# Supplementary material for: Circulating Tumor Cells Exhibit Metastatic Tropism and Reveal Brain Metastasis Drivers
Source: Oxford University Press journal article supplement (doi:10.1158/2159-8290.cd-19-0384), 2019-10-10
Supplement: 219886_2_supp_5811101_pypzhw.xlsx [file 219886_2_supp_5811101_pypzhw.xlsx]

## Sheet: BM menv versus control
Table S4. List of differentially expressed genes in brain stromal cells after tumor formation.
Ensembl gene id	Gene symbol	log2FoldChange	pvalue	padj
ENSMUSG00000026519	Tmem63a	1.54172630438397	5.7323653697338E-09	4.42216160991401E-06
ENSMUSG00000030341	Tnfrsf1a	2.03900887248559	7.10644045878039E-09	0.0000051596937989839
ENSMUSG00000060591	Ifitm2	2.57281611013235	2.24032886411871E-08	0.0000153624328721207
ENSMUSG00000007041	Clic1	2.83907799478012	5.93697675055437E-08	0.0000366400520160463
ENSMUSG00000052837	Junb	1.97263714047809	6.37961510747052E-08	0.000037496947272147
ENSMUSG00000005823	Gpr108	1.24461589779419	1.97916463452092E-07	0.000111040132199508
ENSMUSG00000040152	Thbs1	4.25248839888434	2.31617148260058E-07	0.0001242978461293
ENSMUSG00000035493	Tgfbi	3.53686458415808	2.67393072649924E-07	0.00013751802898825
ENSMUSG00000021281	Tnfaip2	2.71837619839306	4.31316913545987E-07	0.000204759410149927
ENSMUSG00000025492	Ifitm3	2.86686851145678	4.21419231424203E-07	0.000204759410149927
ENSMUSG00000064215	Ifi27	1.84345900977212	4.86685878252375E-07	0.000214541564116752
ENSMUSG00000001348	Acp5	3.97309947356202	4.72928572892384E-07	0.000214541564116752
ENSMUSG00000022952	Runx1	1.97691443049998	5.48653744888406E-07	0.000233518385281296
ENSMUSG00000026547	Tagln2	2.10910547175571	7.11856972929822E-07	0.000292881687229093
ENSMUSG00000032000	Birc3	2.57274233411365	9.94694794532227E-07	0.000396048962868106
ENSMUSG00000073411	H2-D1	2.52763377773032	1.05529633369642E-06	0.000407047582712966
ENSMUSG00000050335	Lgals3	3.39328164396238	1.09806176790181E-06	0.000410708375794305
ENSMUSG00000024659	Anxa1	4.2406602677833	1.76059069728885E-06	0.00060363808268434
ENSMUSG00000001123	Lgals9	2.49958358230315	2.42608519459233E-06	0.000788030777811926
ENSMUSG00000062031	Athl1	1.78925232638404	2.72727225262548E-06	0.000863146702927085
ENSMUSG00000032508	Myd88	1.6751455525887	2.97168076654487E-06	0.000916986392536585
ENSMUSG00000028868	Wasf2	1.19252396200174	3.40784941230491E-06	0.00102592890966048
ENSMUSG00000024048	Myl12a	1.3891700236186	4.82258297066501E-06	0.00138430561876554
ENSMUSG00000020806	Rhbdf2	2.26742559020559	5.03547514937308E-06	0.00141256522201618
ENSMUSG00000046718	Bst2	3.41491718246883	5.68783707241938E-06	0.00156011051077494
ENSMUSG00000042677	Zc3h12a	2.22868822112427	6.32579590445182E-06	0.00169737606192715
ENSMUSG00000035778	Ggta1	1.68052721701897	6.49151822504249E-06	0.00169769846066501
ENSMUSG00000024529	Lox	5.20483740922743	6.60208426735157E-06	0.00169769846066501
ENSMUSG00000024610	Cd74	3.96860326297458	7.08919494849439E-06	0.00178575373978094
ENSMUSG00000006498	Ptbp1	1.01570956282686	8.83386237925498E-06	0.00213796790876753
ENSMUSG00000018819	Lsp1	3.0909393680334	8.71647649849504E-06	0.00213796790876753
ENSMUSG00000003812	Dnase2a	1.85725602296103	0.0000090710215417822	0.00215314651711957
ENSMUSG00000021822	Plau	2.55899300933362	0.0000101231783918302	0.00235755454510113
ENSMUSG00000053175	Bcl3	2.80396439695124	0.0000111995181056162	0.00255991948106705
ENSMUSG00000026483	Fam129a	2.14113344057699	0.0000139235753265813	0.00312470345919988
ENSMUSG00000025366	Esyt1	1.22197435480417	0.0000142238518687523	0.00313508935028589
ENSMUSG00000009772	Nuak2	2.48872933735439	0.0000151116082830284	0.00327232598311262
ENSMUSG00000032231	Anxa2	2.42323066377293	0.0000169367897614939	0.00356571193996836
ENSMUSG00000044786	Zfp36	1.99856164227274	0.0000189180923964612	0.00380186842284579
ENSMUSG00000032515	Csrnp1	2.00751723691505	0.0000193473022711965	0.00380186842284579
ENSMUSG00000034708	Grn	2.20182584120262	0.0000194475405350222	0.00380186842284579
ENSMUSG00000052688	5430435G22Rik	2.86730998588814	0.0000197131636605469	0.00380186842284579
ENSMUSG00000056501	Cebpb	2.90062763732369	0.0000185311599871067	0.00380186842284579
ENSMUSG00000030342	Cd9	1.85474128916953	0.0000205955591526515	0.00385168161547239
ENSMUSG00000016256	Ctsz	2.23818723458986	0.0000224861439137429	0.00414248469145266
ENSMUSG00000020660	Pomc	5.832484879935	0.0000229794360976184	0.00417110558460153
ENSMUSG00000039899	Fgl2	2.81699769064187	0.0000237972838949485	0.00418789384026005
ENSMUSG00000002603	Tgfb1	1.83296606768714	0.0000250638329699955	0.00429670681039797
ENSMUSG00000007891	Ctsd	1.93332187595748	0.0000278553780164986	0.00464537054982512
ENSMUSG00000023243	Kcnk5	3.54117725053216	0.0000282267512952186	0.00464537054982512
ENSMUSG00000024190	Dusp1	1.61073976501293	0.00002922313598945	0.00471099319642427
ENSMUSG00000031207	Msn	1.76362568724243	0.0000293888419448002	0.00471099319642427
ENSMUSG00000028413	B4galt1	1.68864804710016	0.0000326104058113386	0.00516038767858145
ENSMUSG00000033114	Slc35d2	3.06041472398025	0.0000425758047257204	0.00665206528771603
ENSMUSG00000069793	Slfn9	3.32114738013825	0.0000449428182495853	0.0069341150706829
ENSMUSG00000042622	Maff	2.66779956777107	0.000046206578410769	0.00704108391758175
ENSMUSG00000021585	Cast	1.24072559181416	0.0000481999211146705	0.00725526373558998
ENSMUSG00000031838	Ifi30	2.64386394103757	0.0000560956018750456	0.00834202426438178
ENSMUSG00000020424	Gatsl3	2.60376865340112	0.000057300087615011	0.00841970215990573
ENSMUSG00000030339	Ltbr	1.19911678552909	0.0000606565119226074	0.00878265595117378
ENSMUSG00000056737	Capg	2.81272417555694	0.0000611932602933602	0.00878265595117378
ENSMUSG00000037820	Tgm2	1.48966276992929	0.0000624725867448353	0.0088632084849598
ENSMUSG00000054520	Sh3bp2	1.96221476463768	0.0000663498937675043	0.00909951931969229
ENSMUSG00000040751	Lat2	2.61354791037779	0.0000661922423060637	0.00909951931969229
ENSMUSG00000012296	Tjap1	0.914509472130151	0.000068316751403863	0.00926630398437231
ENSMUSG00000027947	Il6ra	1.92853011982286	0.0000707873483083684	0.00949704608880643
ENSMUSG00000022175	Lrp10	1.31376887855115	0.0000727942155602765	0.00955850002830311
ENSMUSG00000042626	Shc1	1.25344095126381	0.0000945563981998151	0.0116710962298032
ENSMUSG00000071637	Cebpd	2.37082867816521	0.0000935598272681328	0.0116710962298032
ENSMUSG00000034947	Tmem106a	2.58675376363346	0.0000909937357187384	0.0116710962298032
ENSMUSG00000034855	Cxcl10	3.60237284660912	0.0000916786782735724	0.0116710962298032
ENSMUSG00000024164	C3	4.41733894812286	0.000100155599194053	0.0122398075331901
ENSMUSG00000054342	Kcnn4	3.67500004915817	0.000102012069299448	0.0123444605035597
ENSMUSG00000031145	Prickle3	1.9171182664102	0.000107722775250197	0.0126717322696052
ENSMUSG00000029622	Arpc1b	2.26405037048848	0.000107796474788022	0.0126717322696052
ENSMUSG00000039377	Hlx	2.99171727928778	0.000109370792775931	0.0127355065588049
ENSMUSG00000022453	Naga	1.32820032724296	0.000112801530836391	0.0130122364029307
ENSMUSG00000071713	Csf2rb	2.69418346383576	0.000114197902045351	0.013051339860609
ENSMUSG00000037824	Tspan14	1.10107381218334	0.000121035276178112	0.0135812583078766
ENSMUSG00000040322	Slc25a24	2.80765916708574	0.00012018898355381	0.0135812583078766
ENSMUSG00000048277	Syngr2	2.51477728096945	0.000123496856442046	0.0137326279194971
ENSMUSG00000003458	Ncstn	0.903924009141646	0.000140349068165614	0.0145573827593964
ENSMUSG00000101191	Gm28809	2.961867884753	0.000134789963162289	0.0145573827593964
ENSMUSG00000015957	Wnt11	3.0927168161983	0.000138101888285173	0.0145573827593964
ENSMUSG00000077714	Snord17	3.95702037290149	0.000136440888649613	0.0145573827593964
ENSMUSG00000040613	Apobec1	2.86053175710705	0.000158110360195958	0.0162057892282713
ENSMUSG00000025044	Msr1	3.98010206136198	0.000170843472647637	0.0172845982204081
ENSMUSG00000030218	Mgp	3.59118618812757	0.000173624936141683	0.0174231917625755
ENSMUSG00000060802	B2m	2.18801173728893	0.000176482893789542	0.0174266268643545
ENSMUSG00000031146	Plp2	2.64032895397993	0.000178873624757159	0.017522517066489
ENSMUSG00000032690	Oas2	2.89908451621825	0.000186201027798793	0.0179553069228164
ENSMUSG00000032860	P2ry2	2.97228903731743	0.0001884910934786	0.0180352369519873
ENSMUSG00000038650	Rnh1	1.29400314960391	0.000193672052144504	0.0182480468673253
ENSMUSG00000001506	Col1a1	4.01911703125557	0.000196046379162373	0.018331821651524
ENSMUSG00000027368	Dusp2	2.55045134408655	0.000203440846498176	0.0188802283332856
ENSMUSG00000031103	Elf4	2.13414677434642	0.00021843146889689	0.0198242619161347
ENSMUSG00000031504	Rab20	3.24568015759342	0.000216986547673356	0.0198242619161347
ENSMUSG00000056569	Mpz	4.79414581129742	0.000223614128137847	0.0200801170988517
ENSMUSG00000028195	Cyr61	3.03629775099844	0.000237883470453143	0.0211237098978644
ENSMUSG00000024927	Rela	1.16172801382762	0.000245282103743446	0.0214717518191869
ENSMUSG00000035678	Tnfsf9	2.4950252632739	0.000248346112193054	0.0215868736816821
ENSMUSG00000025498	Irf7	3.59459733997442	0.000253057012731734	0.0216908521399152
ENSMUSG00000002325	Irf9	1.31819847034229	0.000261197994380286	0.0221888494826658
ENSMUSG00000029304	Spp1	3.00701182738968	0.000264259975204721	0.0221888494826658
ENSMUSG00000000031	H19	4.06049399485006	0.000272020356363996	0.0225377971909312
ENSMUSG00000021025	Nfkbia	1.74345645924486	0.000281002579581208	0.0231227655984724
ENSMUSG00000029468	P2rx7	1.63117490397011	0.000283639784756388	0.0231852043923715
ENSMUSG00000066026	Dhrs3	1.53593343573868	0.000292008547456872	0.0235572647141188
ENSMUSG00000036461	Elf1	1.53790644142775	0.000290603538501337	0.0235572647141188
ENSMUSG00000030208	Emp1	2.83519730781459	0.000294022661131177	0.0235657253658579
ENSMUSG00000053113	Socs3	2.0730175885213	0.000301762567685667	0.0240300346641561
ENSMUSG00000029163	Emilin1	3.0641182675398	0.000305425391432692	0.0240382173090479
ENSMUSG00000018381	Abi3	2.1135015405316	0.000313222405303947	0.0244690135991558
ENSMUSG00000031156	Slc35a2	1.08597794375805	0.000321263156889185	0.0249393153803976
ENSMUSG00000023990	Tfeb	1.20719515104616	0.000326380776643989	0.0251782370382297
ENSMUSG00000068114	Ccdc134	1.50508575141848	0.000343737222600505	0.0257136275064123
ENSMUSG00000069893	9930111J21Rik1	2.30245975089597	0.000342874486488737	0.0257136275064123
ENSMUSG00000020017	Hal	3.22577839607514	0.000342099150510816	0.0257136275064123
ENSMUSG00000026043	Col3a1	4.39539062828706	0.000342012743768382	0.0257136275064123
ENSMUSG00000026822	Lcn2	6.80357381892999	0.000339859435850081	0.0257136275064123
ENSMUSG00000037344	Slc12a9	1.0070036749621	0.000376746200161261	0.0278453793328769
ENSMUSG00000001750	Tcirg1	1.85351692480193	0.000380176514396016	0.027931659030893
ENSMUSG00000078921	Tgtp2	3.52696570208249	0.000382503207639245	0.0279363141532024
ENSMUSG00000041515	Irf8	2.52757920367434	0.000387204377451978	0.0281133154758221
ENSMUSG00000035692	Isg15	3.62966547141848	0.000398988144221758	0.0287994775680068
ENSMUSG00000025225	Nfkb2	2.0669010939186	0.000405871326429513	0.0289576287983785
ENSMUSG00000033880	Lgals3bp	2.6258639466808	0.000405529419319098	0.0289576287983785
ENSMUSG00000089672	Gp49a	3.99563950340862	0.000414082590886445	0.0293736863178815
ENSMUSG00000024732	Ccdc86	1.33963106846375	0.000417881403494629	0.0294737723619097
ENSMUSG00000017760	Ctsa	1.48979443995033	0.000446978336980568	0.0307094449345885
ENSMUSG00000010358	Ifi35	2.04847068433693	0.00044784088861913	0.0307094449345885
ENSMUSG00000070327	Rnf213	1.97936806150894	0.000451430381020238	0.0307845590769768
ENSMUSG00000027642	Rpn2	1.10901507148919	0.000473520827010336	0.0317592561777983
ENSMUSG00000001025	S100a6	2.40079175770694	0.000486307981657933	0.0317592561777983
ENSMUSG00000040212	Emp3	2.51692623427897	0.000483355606204632	0.0317592561777983
ENSMUSG00000028459	Cd72	4.17041830074957	0.000480183050883137	0.0317592561777983
ENSMUSG00000042613	Pbxip1	1.30831438711453	0.000512443112470938	0.0332899228275199
ENSMUSG00000074825	Itpripl1	1.80245568587542	0.000527703568043403	0.0341018070175902
ENSMUSG00000032496	Ltf	7.53557501135641	0.000541701048712959	0.0348240418972086
ENSMUSG00000045817	Zfp36l2	1.47063260028732	0.000557749697130516	0.0354408362222584
ENSMUSG00000079111	Kdelr2	1.71384900283574	0.000562780839306703	0.0354408362222584
ENSMUSG00000022221	Ripk3	2.97932857335136	0.000562718156618242	0.0354408362222584
ENSMUSG00000068220	Lgals1	2.76818190564638	0.000579846929261199	0.0361754390583416
ENSMUSG00000036687	Tmem184a	2.9137200168866	0.000580307618370869	0.0361754390583416
ENSMUSG00000034422	Parp14	1.8059649728612	0.000588781416387547	0.0363366451123575
ENSMUSG00000001918	Slc1a5	2.04868955594168	0.000586447455528774	0.0363366451123575
ENSMUSG00000015839	Nfe2l2	1.69890279395254	0.000598842802123397	0.0364252636043379
ENSMUSG00000001751	Naglu	1.89194791142422	0.000599070607768014	0.0364252636043379
ENSMUSG00000050370	Ch25h	3.43906172472902	0.000595442969832306	0.0364252636043379
ENSMUSG00000028962	Slc4a2	0.984615132518625	0.000615653351411012	0.0370477059494573
ENSMUSG00000040435	Ppp1r15a	1.49479631183328	0.000618312195219007	0.0370477059494573
ENSMUSG00000016087	Fli1	1.60543551794487	0.000621709135904758	0.037071284369432
ENSMUSG00000089255	Snora78	3.59420914221167	0.000626536292228325	0.0371795069950684
ENSMUSG00000026193	Fn1	2.760974470515	0.000638552143641594	0.0375729211857504
ENSMUSG00000027322	Siglec1	3.50680055810431	0.000651068634792528	0.0380859723186928
ENSMUSG00000005087	Cd44	2.23132584583301	0.000687944434345284	0.0398652495451823
ENSMUSG00000029605	Oas1b	2.64647431769711	0.000735993473725224	0.0420572566953261
ENSMUSG00000027580	Helz2	1.73707781692299	0.000742656296003427	0.0422424270118447
ENSMUSG00000026728	Vim	2.12262980684718	0.000753435967426432	0.042658991495158
ENSMUSG00000047407	Tgif1	1.77064225903668	0.000762522223526929	0.0429763096118397
ENSMUSG00000027907	S100a11	3.2992481762724	0.000786580096915692	0.0437331447577945
ENSMUSG00000000204	Slfn4	5.4070998927591	0.000784624401212246	0.0437331447577945
ENSMUSG00000023034	Nr4a1	1.96063468962527	0.000792545702363776	0.0437409691096992
ENSMUSG00000009687	Fxyd5	2.29255444626413	0.000805906244567425	0.0442102256742032
ENSMUSG00000034210	Efcab14	0.672781471423695	0.000820164445052588	0.0445959900673308
ENSMUSG00000027074	Slc43a3	2.68985800368193	0.000816972708812077	0.0445959900673308
ENSMUSG00000037321	Tap1	2.89569950889626	0.000855800369341239	0.0463295787665742
ENSMUSG00000070808	Gltscr1	0.881981632628094	0.000877169244971687	0.0470508648278747
ENSMUSG00000003541	Ier3	2.48444945852502	0.000880559813273844	0.0470508648278747
ENSMUSG00000046410	Kcnk6	1.4562899095724	0.000888604229834544	0.0470731416688746
ENSMUSG00000043091	Tuba1c	2.62973120519527	0.000884802583541345	0.0470731416688746
ENSMUSG00000095115	Itpripl2	1.37529400804751	0.000909006827640584	0.0479481678357595
ENSMUSG00000066306	Numa1	0.483577852129113	0.000919144170285301	0.0480720190416588
ENSMUSG00000022512	Cldn1	2.61504794157173	0.00091608738308914	0.0480720190416588
ENSMUSG00000017721	Pigt	0.979024450928319	0.000933197342330944	0.0484336151281342
ENSMUSG00000086513	9130208D14Rik	2.32532311192617	0.000949601787329537	0.0484336151281342
ENSMUSG00000037095	Lrg1	3.34792349146089	0.00094698190163657	0.0484336151281342
ENSMUSG00000056973	Ces1d	3.87333003024111	0.000948345768503765	0.0484336151281342
ENSMUSG00000027514	Zbp1	3.87667208143179	0.000949577869068944	0.0484336151281342
ENSMUSG00000034957	Cebpa	1.76245352125334	0.000964883791824913	0.0490105376234358
ENSMUSG00000028068	Iqgap3	3.8721059084534	0.000979265637787974	0.0493350031314978
ENSMUSG00000049606	Zfp644	-1.010104365	0.00000121	0.000440092784
ENSMUSG00000025326	Ube3a	-1.178522874	0.00000147	0.0005181633623
ENSMUSG00000034636	Zyg11b	-1.077963634	0.00000465	0.001366071146
ENSMUSG00000046785	Epm2aip1	-1.188245975	0.00002	0.00380238152
ENSMUSG00000085438	1700020I14Rik	-1.166149607	0.0000234	0.00418789384
ENSMUSG00000046138	9930021J03Rik	-0.9077768554	0.000027	0.004572472076
ENSMUSG00000021772	Nkiras1	-1.343624379	0.0000635	0.008900923316
ENSMUSG00000075376	Rc3h2	-1.052677147	0.0000933	0.01167109623
ENSMUSG00000024083	Pja2	-1.04822243	0.0000942	0.01167109623
ENSMUSG00000042444	Fam63b	-0.9574595875	0.0001281376778	0.01412145854
ENSMUSG00000027104	Atf2	-0.8662917466	0.0001370882951	0.01455738276
ENSMUSG00000026361	Cdc73	-0.805273056	0.00013972135	0.01455738276
ENSMUSG00000026516	Nvl	-0.7323098733	0.000134359991	0.01455738276
ENSMUSG00000074781	Ube2n	-1.071690558	0.0001588674145	0.01620578923
ENSMUSG00000031010	Usp9x	-0.7700596528	0.0001753429844	0.01742662686
ENSMUSG00000032393	Dpp8	-0.679402203	0.0002112835683	0.01946173943
ENSMUSG00000078185	Chml	-1.411381216	0.0002245042664	0.0200801171
ENSMUSG00000056342	Usp34	-0.7949904502	0.0002506279189	0.02163286995
ENSMUSG00000090935	Synj2bp	-1.264218027	0.0002637306873	0.02218884948
ENSMUSG00000045767	B230219D22Rik	-0.7632908035	0.000272067713	0.02253779719
ENSMUSG00000025894	Aasdhppt	-1.112372413	0.0003729287082	0.02772927136
ENSMUSG00000026024	Als2	-0.8818183632	0.0004248265054	0.02979337248
ENSMUSG00000034021	Pds5b	-1.050817221	0.0004272892764	0.02979678835
ENSMUSG00000030870	Ubfd1	-0.9368538105	0.0004384957185	0.03040647558
ENSMUSG00000047879	Usp14	-1.158092007	0.0004841239637	0.03175925618
ENSMUSG00000017291	Taok1	-0.904718148	0.0004731252531	0.03175925618
ENSMUSG00000021096	Ppm1a	-0.743494781	0.000476025323	0.03175925618
ENSMUSG00000036941	Elac1	-0.9570073431	0.0005528649724	0.03535757697
ENSMUSG00000022772	Senp5	-0.7260865997	0.0006154492612	0.03704770595
ENSMUSG00000037286	Stag1	-0.7485836221	0.0006392541075	0.03757292119
ENSMUSG00000059920	4930453N24Rik	-0.8426824286	0.0006686611433	0.03893058723
ENSMUSG00000042208	0610010F05Rik	-1.002809822	0.00070738101	0.04080001779
ENSMUSG00000036819	Jmjd4	-0.9482359559	0.0007313630183	0.04198704063
ENSMUSG00000026771	Spopl	-0.8393897499	0.0007938083999	0.04374096911
ENSMUSG00000022016	Akap11	-1.047964893	0.0008753575482	0.04705086483
ENSMUSG00000025266	Gnl3l	-0.8742777769	0.0009447404102	0.04843361513
ENSMUSG00000020580	Rock2	-1.013349697	0.0009727191851	0.04920603648
