# Supplementary material for: Circulating Tumor Cells Exhibit Metastatic Tropism and Reveal Brain Metastasis Drivers
Source: Oxford University Press journal article supplement (doi:10.1158/2159-8290.cd-19-0384), 2019-10-10
Supplement: 219886_2_supp_5811102_pypzhw.xlsx [file 219886_2_supp_5811102_pypzhw.xlsx]

## Sheet: Braintropic-vs-nonbraintropic
Table S8. List of upregulated genes associated with brain tropism in CTCs. Gene list was generated by a comparison between parental CTCs and brain metastatic variants.
Ensembl gene id	Gene symbol	log2FoldChange	pvalue	padj
ENSG00000141424	SLC39A6	4.55925809173536	8.10606593071139E-46	2.74019768740605E-42
ENSG00000134759	ELP2	3.3783399724283	1.18807176039496E-40	2.8113342066226E-37
ENSG00000198876	DCAF12	1.35307847818703	8.0570198285967E-39	1.73321145640076E-35
ENSG00000134440	NARS	1.7834623221508	4.55001977069243E-35	8.28208598722268E-32
ENSG00000090054	SPTLC1	1.89495182215077	1.62519573407731E-34	2.74692904681938E-31
ENSG00000176454	LPCAT4	4.4848119647255	2.04036907611058E-29	2.29910730704784E-26
ENSG00000135018	UBQLN1	1.56657575759805	3.99187572640574E-26	2.95186735356059E-23
ENSG00000150990	DHX37	1.9965818886735	2.62120043566925E-25	1.67636394349301E-22
ENSG00000176834	VSIG10	3.04809546593394	2.80759118618311E-25	1.74831658522766E-22
ENSG00000070087	PFN2	3.83797554835755	1.19852220311976E-24	6.9172270469324E-22
ENSG00000118680	MYL12B	2.40669515110081	2.77852612383731E-24	1.52902938763633E-21
ENSG00000116791	CRYZ	2.71150501367075	2.92048172408299E-24	1.5706217962949E-21
ENSG00000188488	SERPINA5	5.18913920168372	6.24864228964791E-24	3.21438309782475E-21
ENSG00000155827	RNF20	1.91640521021773	9.97997026792152E-24	4.91991742603806E-21
ENSG00000025800	KPNA6	1.55648472575892	1.80357420393668E-23	8.53559527755075E-21
ENSG00000134779	TPGS2	2.11836816915105	2.03948031566179E-23	9.46278876656959E-21
ENSG00000114021	NIT2	1.6981876046133	9.8194373596118E-22	4.00616114207748E-19
ENSG00000116005	PCYOX1	1.42764933620469	1.59293694638645E-20	5.98312174005436E-18
ENSG00000186153	WWOX	3.08870957491437	3.29901202677903E-20	1.1827957816617E-17
ENSG00000082212	ME2	2.39337645876354	7.05512701508391E-20	2.41949957330334E-17
ENSG00000165060	FXN	2.96684705925973	7.31131147052068E-20	2.43672624404128E-17
ENSG00000198162	MAN1A2	1.50664655020691	1.06348676389758E-19	3.44729962932992E-17
ENSG00000164695	CHMP4C	2.83125543387175	1.76955828870074E-19	5.65852132236833E-17
ENSG00000172775	FAM192A	1.24377054624867	2.01810279813666E-19	6.12235468106511E-17
ENSG00000125505	MBOAT7	2.06778735241958	2.30060676408868E-19	6.89104529856083E-17
ENSG00000017797	RALBP1	1.79243892437499	2.79296741869729E-19	8.15925778131283E-17
ENSG00000140836	ZFHX3	1.9504367952037	2.77319923019315E-19	8.15925778131283E-17
ENSG00000070770	CSNK2A2	1.33563533474259	3.12531195681449E-19	8.80407819453587E-17
ENSG00000107537	PHYH	2.47632869373965	6.24608247516202E-19	1.67955738192908E-16
ENSG00000134490	TMEM241	1.45124256412752	6.57074736140446E-19	1.74700668329117E-16
ENSG00000124313	IQSEC2	2.51274082930828	1.43713374362522E-18	3.69640171471778E-16
ENSG00000135063	FAM189A2	5.5258936246576	1.64228210173768E-18	4.13418312483179E-16
ENSG00000116478	HDAC1	1.13900158906359	2.79033091015582E-18	6.80696910587807E-16
ENSG00000103042	SLC38A7	2.14992114818321	4.48459849365869E-18	1.06119054155446E-15
ENSG00000185651	UBE2L3	1.24927805971937	5.22292735365328E-18	1.22366465316334E-15
ENSG00000131100	ATP6V1E1	1.59508943713229	6.34559840848964E-18	1.45782422466107E-15
ENSG00000046604	DSG2	2.08031812359974	7.06491256766128E-18	1.60747140469778E-15
ENSG00000197563	PIGN	1.90833622078145	7.57761765427734E-18	1.70770634812538E-15
ENSG00000177570	SAMD12	3.1537650305425	8.69974279910553E-18	1.9420944703324E-15
ENSG00000081377	CDC14B	3.30519683480004	1.19065143416591E-17	2.60873934135813E-15
ENSG00000162636	FAM102B	3.46520751527197	1.53597593762262E-17	3.27439627134812E-15
ENSG00000111707	SUDS3	1.11208474379825	2.12453057646347E-17	4.37154495920479E-15
ENSG00000151465	CDC123	1.14428887036332	3.13269266909016E-17	6.30173070789854E-15
ENSG00000089220	PEBP1	1.24127345258846	3.28618836391779E-17	6.53454413910812E-15
ENSG00000066926	FECH	2.71335802145583	4.45699801806904E-17	8.64474951652194E-15
ENSG00000102572	STK24	1.3323426223488	5.41770571647595E-17	1.00944228636985E-14
ENSG00000122497		2.17410566391787	6.71763777094467E-17	1.24187080135831E-14
ENSG00000100439	ABHD4	1.68566368859047	7.36722355599164E-17	1.35140008531341E-14
ENSG00000196116	TDRD7	2.68131095103525	1.01553284562429E-16	1.80329610827128E-14
ENSG00000075643	MOCOS	3.86939221759037	1.24447086262912E-16	2.16528779576419E-14
ENSG00000161179	YDJC	2.44524671190645	1.48545451590118E-16	2.52879929566687E-14
ENSG00000136997	MYC	4.89720751305378	1.56343867113714E-16	2.64254637679415E-14
ENSG00000141380	SS18	1.55226081167823	2.40461375400425E-16	3.897285976781E-14
ENSG00000198892	SHISA4	3.55403098287647	2.85006548788074E-16	4.55683105673796E-14
ENSG00000165118	C9orf64	1.75757922262457	3.12856379419317E-16	4.93541367079954E-14
ENSG00000160094	ZNF362	1.96682345127806	3.47157636442772E-16	5.40446786259561E-14
ENSG00000168646	AXIN2	5.54013529253946	4.67557632926788E-16	7.17176942801673E-14
ENSG00000159596	TMEM69	1.7804362624175	6.23033069541017E-16	9.39033855066821E-14
ENSG00000174891	RSRC1	1.55539458235229	6.54473585278207E-16	9.80177749901153E-14
ENSG00000145808	ADAMTS19	6.11147011337939	7.19803883123502E-16	1.07124020668877E-13
ENSG00000070214	SLC44A1	1.40869634325763	7.85564400547882E-16	1.16180065063528E-13
ENSG00000129675	ARHGEF6	4.24662727875686	1.19535373164736E-15	1.71428214254373E-13
ENSG00000162521	RBBP4	1.07528177223889	1.40353009096477E-15	2.00070677966864E-13
ENSG00000188938	FAM120AOS	1.33549552433541	1.73302114758438E-15	2.41226349501701E-13
ENSG00000068697	LAPTM4A	2.03583403996611	1.76034006978261E-15	2.43596064744246E-13
ENSG00000103502	CDIPT	1.92430030966714	2.2350368660193E-15	3.05709117691414E-13
ENSG00000181817	LSM10	2.37444238843476	4.476593391492E-15	5.98472482615114E-13
ENSG00000133460	SLC2A11	1.80874837185424	4.85780915650657E-15	6.45788416125927E-13
ENSG00000163785	RYK	1.21960672024901	5.07452380131497E-15	6.70829367097855E-13
ENSG00000135677	GNS	1.48751218521386	6.14418371663209E-15	8.03258670092073E-13
ENSG00000253719	ATXN7L3B	1.27165012954428	6.24288821971274E-15	8.11678373313531E-13
ENSG00000054116	TRAPPC3	1.3372718145003	8.53551625190824E-15	1.09176173550759E-12
ENSG00000184058	TBX1	4.21886210094324	9.35614557332797E-15	1.1839276615062E-12
ENSG00000115207	GTF3C2	1.13585324369267	1.12241982928897E-14	1.39788528528762E-12
ENSG00000141428	C18orf21	2.14110343539466	1.13097051271089E-14	1.40115996032868E-12
ENSG00000101210	EEF1A2	3.69128832047667	1.14252416314525E-14	1.40810152460969E-12
ENSG00000125037	EMC3	1.33625623366495	3.04018590150117E-14	3.47374571140887E-12
ENSG00000135148	TRAFD1	1.82838071780601	3.47201197747122E-14	3.91229616299531E-12
ENSG00000120071	KANSL1	1.22397543628576	5.11043964579265E-14	5.62457364364612E-12
ENSG00000007944	MYLIP	3.39293897250393	5.33556569382147E-14	5.80099442874057E-12
ENSG00000130513	GDF15	7.83305012383031	6.43583449654297E-14	6.92232507689529E-12
ENSG00000110906	KCTD10	1.38824699120731	6.48746985127464E-14	6.94628955161592E-12
ENSG00000136048	DRAM1	2.85526682448841	6.73075553689121E-14	7.11487590691099E-12
ENSG00000113845	TIMMDC1	1.07927176077117	9.26665646771815E-14	9.7025173449387E-12
ENSG00000175970	UNC119B	1.42995149681522	1.1252484485496E-13	1.15768495817519E-11
ENSG00000168591	TMUB2	1.47747883686118	1.14982908184389E-13	1.17277610188241E-11
ENSG00000173175	ADCY5	6.4948963636469	1.16632197452447E-13	1.18449257009324E-11
ENSG00000136045	PWP1	1.12813492913062	1.30369421176011E-13	1.31273685671827E-11
ENSG00000237190	CDKN2AIPNL	1.50475873831407	1.45365884080335E-13	1.45138941560885E-11
ENSG00000039560	RAI14	1.9457473281144	1.51919301448974E-13	1.51044807991054E-11
ENSG00000135040	NAA35	1.23446619018549	1.9911076691375E-13	1.96314919895003E-11
ENSG00000116288	PARK7	1.70935931512995	2.42514336229325E-13	2.37132923065889E-11
ENSG00000187764	SEMA4D	1.80161118156203	2.45393464534924E-13	2.38960722275305E-11
ENSG00000176393	RNPEP	1.35026856543866	2.81059906213071E-13	2.714579820702E-11
ENSG00000066136	NFYC	1.06340872366727	3.10171251219705E-13	2.97149081684691E-11
ENSG00000037042	TUBG2	2.44193398909966	3.30852905156868E-13	3.14416558021164E-11
ENSG00000113732	ATP6V0E1	1.57809505252415	3.84220615712463E-13	3.60786207523968E-11
ENSG00000183431	SF3A3	1.18245841962229	4.25963018748655E-13	3.95276976966644E-11
ENSG00000167085	PHB	1.63636235127527	4.49594644522471E-13	4.15576487239657E-11
ENSG00000099940	SNAP29	1.1867124370355	4.84185025320999E-13	4.4580818109614E-11
ENSG00000130958	SLC35D2	1.71896294121269	6.04116340652126E-13	5.39441696937783E-11
ENSG00000135047	CTSL	2.90764337830354	6.2088472058715E-13	5.52330644483223E-11
ENSG00000025772	TOMM34	1.65839552075021	6.57842595048911E-13	5.80840646516507E-11
ENSG00000084112	SSH1	1.70989851670546	7.58716874345401E-13	6.67417003629562E-11
ENSG00000198000	NOL8	1.73935744714445	7.67926917958776E-13	6.70533382275222E-11
ENSG00000088448	ANKRD10	1.48616577479281	1.1531808988093E-12	9.85116231354676E-11
ENSG00000047579	DTNBP1	1.10019759076936	1.3509339280387E-12	1.14577596914623E-10
ENSG00000167216	KATNAL2	2.35412509985424	1.37480947574582E-12	1.16186130802047E-10
ENSG00000113580	NR3C1	3.96936309641027	1.53347282502478E-12	1.28221086426012E-10
ENSG00000090238	YPEL3	1.79291991088758	1.57765557469321E-12	1.3145092909847E-10
ENSG00000164054	SHISA5	1.99630554071829	1.96577272186739E-12	1.60955293832346E-10
ENSG00000134996	OSTF1	1.37698887027028	2.05028153613939E-12	1.67295903412643E-10
ENSG00000108448	TRIM16L	1.76279765407263	2.08098591705353E-12	1.69217765481917E-10
ENSG00000015171	ZMYND11	0.955132596889887	2.12109991252063E-12	1.71888997362931E-10
ENSG00000183597	TANGO2	1.6144394138285	2.36924879715761E-12	1.8940383205115E-10
ENSG00000079134	THOC1	1.90595314990044	2.56736712154596E-12	2.0386445703739E-10
ENSG00000130939	UBE4B	1.28217848076846	2.74057040917281E-12	2.15448895655337E-10
ENSG00000167191	GPRC5B	3.78597423693711	2.86381522594061E-12	2.24392250633883E-10
ENSG00000111684	LPCAT3	1.27406494404822	3.01207241045227E-12	2.33687440814859E-10
ENSG00000133313	CNDP2	1.78232373815741	3.83695628284113E-12	2.91754992141016E-10
ENSG00000139433	GLTP	1.93910951389153	3.84683081384427E-12	2.91754992141016E-10
ENSG00000111879	FAM184A	3.39638549350801	3.83152143734074E-12	2.91754992141016E-10
ENSG00000185963	BICD2	1.24277081931285	3.97481187693131E-12	3.00498317711903E-10
ENSG00000138413	IDH1	2.3472734866964	4.2673057980403E-12	3.21583621334483E-10
ENSG00000164172	MOCS2	1.75394334181516	4.29216887970651E-12	3.22430451430144E-10
ENSG00000159658	EFCAB14	0.969616472445011	4.37229064278896E-12	3.27409852785807E-10
ENSG00000111670	GNPTAB	1.9157376591301	4.49034750692431E-12	3.34135512755818E-10
ENSG00000106771	TMEM245	1.47297633070641	4.75912371006099E-12	3.51922326097417E-10
ENSG00000111786	SRSF9	1.22979530096966	4.93256054713107E-12	3.636111533544E-10
ENSG00000178057	NDUFAF3	1.55757107972536	4.95713722301583E-12	3.64288006547278E-10
ENSG00000197724	PHF2	1.28911416120672	6.66500655974772E-12	4.85274000687109E-10
ENSG00000172172	MRPL13	1.53269545726914	7.29095071317509E-12	5.22736037640522E-10
ENSG00000128604	IRF5	2.7753711172211	8.2101357121502E-12	5.81665992085659E-10
ENSG00000249859	PVT1	2.34980508741067	8.41087134365694E-12	5.92340620848078E-10
ENSG00000134504	KCTD1	0.924299869333859	9.6259421983035E-12	6.70326846250542E-10
ENSG00000160072	ATAD3B	2.14548349377309	9.63153986076086E-12	6.70326846250542E-10
ENSG00000148110	MFSD14B	1.4062488924605	9.80424297524404E-12	6.7923676598349E-10
ENSG00000119537	KDSR	1.65733428304995	9.81697054331038E-12	6.7923676598349E-10
ENSG00000135090	TAOK3	1.38044500517882	1.08967621067626E-11	7.51749509423681E-10
ENSG00000122971	ACADS	2.61467462455021	1.15169992446372E-11	7.92228933505379E-10
ENSG00000203813		3.46111083248826	1.47936817733623E-11	1.00304553525236E-09
ENSG00000124523	SIRT5	1.69423666000188	1.60497598998271E-11	1.07893599008412E-09
ENSG00000146007	ZMAT2	1.63477368132561	1.72735437425357E-11	1.15378751526309E-09
ENSG00000168280	KIF5C	5.33877343682551	1.73582536209973E-11	1.15378751526309E-09
ENSG00000198744	MTCO3P12	3.32122741086139	1.75429585176231E-11	1.16279839608548E-09
ENSG00000177337	DLGAP1-AS1	3.31594492348732	1.85233452243455E-11	1.22094127588771E-09
ENSG00000134444	KIAA1468	1.4245042551642	2.09188715816171E-11	1.37120016131802E-09
ENSG00000212864	RNF208	1.95266950174215	2.20419783939524E-11	1.42898447872903E-09
ENSG00000146197	SCUBE3	3.60864077067889	2.21903833248637E-11	1.43467497436134E-09
ENSG00000085719	CPNE3	1.14258847998856	2.30465911073155E-11	1.48597134978858E-09
ENSG00000101608	MYL12A	1.8627744716564	2.38337591016405E-11	1.53254956962532E-09
ENSG00000100028	SNRPD3	1.29126144258817	2.53901466395863E-11	1.62820336025076E-09
ENSG00000165140	FBP1	1.95979147620371	2.57389413014622E-11	1.64167269007143E-09
ENSG00000117472	TSPAN1	3.29666613751635	2.59853041232923E-11	1.6484993336983E-09
ENSG00000141759	TXNL4A	1.68730208296927	2.92057385349397E-11	1.84292104253941E-09
ENSG00000198492	YTHDF2	1.16087238098108	3.8104330619716E-11	2.36037375773388E-09
ENSG00000142178	SIK1	3.56468673514011	4.09611968003155E-11	2.51104870436753E-09
ENSG00000116096	SPR	2.06540706977727	4.23063496186404E-11	2.5801421418193E-09
ENSG00000233276	GPX1	3.75350588970323	4.30902730024705E-11	2.61447469245502E-09
ENSG00000103044	HAS3	3.70346004301458	4.75122369362724E-11	2.84628370284307E-09
ENSG00000198478	SH3BGRL2	4.06830446262769	5.42570393632684E-11	3.20971080613255E-09
ENSG00000125247	TMTC4	2.00158239583223	5.59725528775221E-11	3.29472268343484E-09
ENSG00000075856	SART3	0.866270982855271	5.69318663179068E-11	3.32636729056946E-09
ENSG00000225733	FGD5-AS1	1.20875387709802	5.67975505621079E-11	3.32636729056946E-09
ENSG00000076604	TRAF4	1.69025457755907	5.97402615808383E-11	3.47330174394933E-09
ENSG00000166479	TMX3	1.53161407656466	6.08449172499396E-11	3.52685571018893E-09
ENSG00000102606	ARHGEF7	1.16763408643444	6.49080926847767E-11	3.74614682243871E-09
ENSG00000162522	KIAA1522	1.13935390206807	6.5554655696695E-11	3.74690777234515E-09
ENSG00000141279	NPEPPS	1.53754670174565	6.52694640369658E-11	3.74690777234515E-09
ENSG00000188042	ARL4C	4.79282777896049	7.240988073357E-11	4.06991688313175E-09
ENSG00000141349	G6PC3	1.93419065197734	7.37492245852449E-11	4.1353741738404E-09
ENSG00000111144	LTA4H	1.64217313068649	8.56627821814666E-11	4.74716256384085E-09
ENSG00000152217	SETBP1	1.86422980639137	8.81478126209003E-11	4.86210184160458E-09
ENSG00000120709	FAM53C	1.34768962238155	8.85765996864639E-11	4.87439087995534E-09
ENSG00000141425	RPRD1A	1.53018222362409	9.47070359415611E-11	5.17564108888028E-09
ENSG00000243587		3.20101340637069	9.59059738212986E-11	5.22908538832578E-09
ENSG00000123094	RASSF8	2.79983650095357	9.71697784370449E-11	5.28581256817424E-09
ENSG00000181481	RNF135	1.45294353286657	9.8368527625278E-11	5.33874878256182E-09
ENSG00000040341	STAU2	1.45458772366752	1.00937896703141E-10	5.45318139197812E-09
ENSG00000133083	DCLK1	4.50565521802082	1.0207922098948E-10	5.50227928536231E-09
ENSG00000158079	PTPDC1	1.1913612374475	1.03068725827435E-10	5.54298922557863E-09
ENSG00000023318	ERP44	1.56965349016916	1.03526505699577E-10	5.55498345661926E-09
ENSG00000136874	STX17	1.4609827934787	1.12914160765514E-10	6.00424221616709E-09
ENSG00000101098	RIMS4	4.55077734755386	1.23961878674833E-10	6.56221461987155E-09
ENSG00000108256	NUFIP2	1.33263516109742	1.31478761320196E-10	6.92913569959865E-09
ENSG00000084623	EIF3I	1.05392032545801	1.35756732743143E-10	7.13869237089111E-09
ENSG00000125991	ERGIC3	1.14272467147937	1.39200200053091E-10	7.2873768448148E-09
ENSG00000215513		2.10863885102102	1.40347281148194E-10	7.33120908125763E-09
ENSG00000106723	SPIN1	1.16916650418434	1.41408641436725E-10	7.37038035752691E-09
ENSG00000183317	EPHA10	1.87578766145603	1.44793225479115E-10	7.51368880375504E-09
ENSG00000182195	LDOC1	1.55514046170767	1.51139974903952E-10	7.80878870338914E-09
ENSG00000178163	ZNF518B	1.8273386233655	1.58705756773467E-10	8.181817696145E-09
ENSG00000089248	ERP29	1.77541860038722	1.61360890561614E-10	8.28260900945653E-09
ENSG00000172197	MBOAT1	2.41581792486741	1.63974400436355E-10	8.39854163966549E-09
ENSG00000141576	RNF157	3.29806773562533	1.68185896150716E-10	8.57711823408275E-09
ENSG00000162772	ATF3	3.21161629758307	1.70951185576025E-10	8.64362800061E-09
ENSG00000101079	NDRG3	1.0612030172687	1.81823568501738E-10	9.13480064003532E-09
ENSG00000170085	SIMC1	1.59041513942771	1.87788057593297E-10	9.41446781108088E-09
ENSG00000135002	RFK	2.54205482340893	1.97354676285687E-10	9.87315793857973E-09
ENSG00000141429	GALNT1	1.48251873229345	1.99895486666546E-10	9.9791706771951E-09
ENSG00000066322	ELOVL1	1.530742133597	2.14277481102745E-10	1.06298700950404E-08
ENSG00000196535	MYO18A	1.9412415981237	2.2131772304058E-10	1.09357514272263E-08
ENSG00000136044	APPL2	0.99581007661428	2.36794466518645E-10	1.15769988868403E-08
ENSG00000100997	ABHD12	1.08598825341728	2.43388295600841E-10	1.18748396676344E-08
ENSG00000104341	LAPTM4B	2.22515844137217	2.54035288489903E-10	1.23181086711815E-08
ENSG00000119328	FAM206A	1.15867022391777	2.58425214517012E-10	1.24798282675838E-08
ENSG00000155621	C9orf85	1.69061258375887	2.58384485348256E-10	1.24798282675838E-08
ENSG00000121691	CAT	1.4706285229487	2.66526697334719E-10	1.28448497739948E-08
ENSG00000116353	MECR	1.34411590463399	2.68389062480182E-10	1.28821305993277E-08
ENSG00000108439	PNPO	1.37851679734439	2.72565157797723E-10	1.30560917590436E-08
ENSG00000160049	DFFA	0.898004491070319	3.02515823335309E-10	1.44032835565059E-08
ENSG00000110917	MLEC	1.33005523661774	3.05162942184909E-10	1.4471083568981E-08
ENSG00000151474	FRMD4A	2.31818614932815	3.19569953116035E-10	1.51239676011695E-08
ENSG00000167608	TMC4	2.05440441085306	3.57511934732964E-10	1.68522010190959E-08
ENSG00000071553	ATP6AP1	1.43826480775346	3.58958391226077E-10	1.68867443570232E-08
ENSG00000123472	ATPAF1	1.00114916710413	4.10541145889621E-10	1.90857271811122E-08
ENSG00000145730	PAM	2.98703031968726	4.11368407698983E-10	1.90866875125118E-08
ENSG00000187522	HSPA14	1.05268587154317	4.17336868482994E-10	1.92333953722466E-08
ENSG00000143727	ACP1	1.19872381428539	4.16584623348708E-10	1.92333953722466E-08
ENSG00000048828	FAM120A	1.35775265646009	4.17933668670747E-10	1.92333953722466E-08
ENSG00000134884	ARGLU1	1.41656342031451	4.18594371664921E-10	1.92333953722466E-08
ENSG00000102034	ELF4	1.49867591411396	4.81089466317412E-10	2.18923462335941E-08
ENSG00000122490	PQLC1	1.29914924987723	4.82828564935057E-10	2.19067509395322E-08
ENSG00000163975	MELTF	2.42840468377365	4.83257574713088E-10	2.19067509395322E-08
ENSG00000126067	PSMB2	1.41713213181801	4.96063311302254E-10	2.23587545435147E-08
ENSG00000163866	SMIM12	1.3155689251662	5.0026226043548E-10	2.24624399785289E-08
ENSG00000160145	KALRN	2.04965835457099	5.02751961508106E-10	2.25314766385726E-08
ENSG00000134900	TPP2	1.24681416112759	5.10612934467592E-10	2.28405177094643E-08
ENSG00000176853	FAM91A1	1.07139047307525	5.13299873235108E-10	2.29173866044573E-08
ENSG00000141452	C18orf8	1.40804669992999	5.77857711419769E-10	2.5654497233257E-08
ENSG00000116898	MRPS15	1.24599257503376	5.99714531788916E-10	2.65749905725115E-08
ENSG00000127124	HIVEP3	1.48791722794945	6.60156201621161E-10	2.90029830950469E-08
ENSG00000081913	PHLPP1	1.30266380959694	6.63627888746669E-10	2.9080419872986E-08
ENSG00000148925	BTBD10	1.13847936696534	6.74365331125842E-10	2.94963157678943E-08
ENSG00000126088	UROD	1.43907370168701	6.94295761174082E-10	3.01451754067198E-08
ENSG00000171735	CAMTA1	1.77853715220241	6.93482209660668E-10	3.01451754067198E-08
ENSG00000146555	SDK1	4.12068741497991	7.19799330363762E-10	3.11382295327198E-08
ENSG00000257267	ZNF271P	1.35090678858783	8.12430207285846E-10	3.48270579619655E-08
ENSG00000120526	NUDCD1	1.45005231190724	8.42703634506115E-10	3.59943972984083E-08
ENSG00000170266	GLB1	1.86537371244055	8.59917261001992E-10	3.66634633280903E-08
ENSG00000135070	ISCA1	1.51817317078128	9.34667142530223E-10	3.96362519600227E-08
ENSG00000149658	YTHDF1	0.992743985010728	9.44915079421586E-10	3.9999151206356E-08
ENSG00000166164	BRD7	0.908144179938698	1.01605830356018E-09	4.2781116792072E-08
ENSG00000138029	HADHB	1.1132474661732	1.12004113581904E-09	4.67434451444197E-08
ENSG00000121274	PAPD5	2.30027599349416	1.15523920173949E-09	4.79586407557221E-08
ENSG00000181513	ACBD4	1.98784996960775	1.24507903625391E-09	5.15075266343989E-08
ENSG00000165434	PGM2L1	2.9163879667647	1.2644656175574E-09	5.22182371871914E-08
ENSG00000096384	HSP90AB1	1.18737041355136	1.26856087087115E-09	5.22960903962089E-08
ENSG00000119139	TJP2	1.09964327982238	1.27968849242235E-09	5.25990529373431E-08
ENSG00000075336	TIMM21	1.41933641875052	1.28035559700417E-09	5.25990529373431E-08
ENSG00000187742	SECISBP2	1.02088465249261	1.28492975242293E-09	5.26954813372336E-08
ENSG00000152683	SLC30A6	1.20533603182528	1.39819010242497E-09	5.66530349206883E-08
ENSG00000167566	NCKAP5L	3.31268505996544	1.44884812714706E-09	5.8505278554063E-08
ENSG00000000003	TSPAN6	2.8028330118332	1.56504541653405E-09	6.2982431448036E-08
ENSG00000163755	HPS3	1.46656981756335	1.57962924575878E-09	6.34614038071136E-08
ENSG00000166971	AKTIP	1.45069385761469	1.60121967853859E-09	6.41111019513682E-08
ENSG00000164919	COX6C	3.34013788395617	1.73480144129066E-09	6.88971252168176E-08
ENSG00000136897	MRPL50	1.64199425651842	1.83073053592252E-09	7.23214969474701E-08
ENSG00000030582	GRN	2.18371711623055	1.84096209907509E-09	7.26044769173562E-08
ENSG00000119541	VPS4B	1.1606745309046	1.9887057489652E-09	7.77830481615925E-08
ENSG00000257315	ZBED6	1.26250884887026	2.10113511957427E-09	8.1640657363688E-08
ENSG00000185825	BCAP31	1.46095424171873	2.1609737291744E-09	8.38280677925472E-08
ENSG00000124762	CDKN1A	3.62258593680202	2.25801452901561E-09	8.7306205555713E-08
ENSG00000070761	CFAP20	1.31970684843568	2.29316518258584E-09	8.79467872212785E-08
ENSG00000146463	ZMYM4	1.06142149508314	2.36309424709852E-09	9.01304842770691E-08
ENSG00000119760	SUPT7L	1.08370669490064	2.35986064875991E-09	9.01304842770691E-08
ENSG00000169991	IFFO2	2.44419668338003	2.37102223733208E-09	9.01304842770691E-08
ENSG00000104824	HNRNPL	0.660151517265768	2.40223343271007E-09	9.09504795491494E-08
ENSG00000141644	MBD1	0.810842608689383	2.42592173452146E-09	9.17006166197786E-08
ENSG00000110492	MDK	2.82152861432515	2.56689342616171E-09	9.65666123104365E-08
ENSG00000049245	VAMP3	1.03275930631075	2.67291341149901E-09	1.00077769076426E-07
ENSG00000144659	SLC25A38	1.23418871641952	2.77507150794227E-09	1.03411837940847E-07
ENSG00000124155	PIGT	1.81542372479693	2.81511973118295E-09	1.04739273897771E-07
ENSG00000115216	NRBP1	1.05767305483895	2.91244228635138E-09	1.08020567119017E-07
ENSG00000187566	NHLRC1	2.00312489062884	2.97317813643187E-09	1.10100648266647E-07
ENSG00000111361	EIF2B1	0.856418855702194	2.98324403025205E-09	1.10300786699772E-07
ENSG00000159202	UBE2Z	1.13886203345662	3.25862011914669E-09	1.1966879922994E-07
ENSG00000107362	ABHD17B	2.29713520552122	3.34666188144669E-09	1.2239885641526E-07
ENSG00000101158	NELFCD	0.88531959522486	3.35627504238055E-09	1.22561012851622E-07
ENSG00000159263	SIM2	3.03795459585085	3.40320537581203E-09	1.23892382781292E-07
ENSG00000105649	RAB3A	1.92498334438432	3.57325697078213E-09	1.2928743073336E-07
ENSG00000165105	RASEF	1.76709418217907	3.7396270736033E-09	1.3489450524798E-07
ENSG00000154767	XPC	0.974390743307748	3.79450304499917E-09	1.36271692708449E-07
ENSG00000130309	COLGALT1	1.64318870967754	3.78783144816686E-09	1.36271692708449E-07
ENSG00000156469	MTERF3	1.39108345548084	4.0525552498727E-09	1.44857424286613E-07
ENSG00000107929	LARP4B	0.653372229876279	4.08744058672913E-09	1.45884022026805E-07
ENSG00000148429	USP6NL	0.930341097982841	4.17796713859317E-09	1.48890416265859E-07
ENSG00000118961	LDAH	1.6250829052993	4.22308707917555E-09	1.50272044442904E-07
ENSG00000117450	PRDX1	1.86819496705315	4.28454554963209E-09	1.52001801110861E-07
ENSG00000171865	RNASEH1	1.34751650461852	4.34377142937862E-09	1.53642247135107E-07
ENSG00000164934	DCAF13	1.41318301364573	4.57040225732472E-09	1.6141705763444E-07
ENSG00000163635	ATXN7	1.00214008455214	4.62918352379962E-09	1.63249433269255E-07
ENSG00000114902	SPCS1	1.44146121942619	4.6441654747482E-09	1.63291066313472E-07
ENSG00000143412	ANXA9	1.98053416570538	4.70535616542779E-09	1.65197096353884E-07
ENSG00000178719	GRINA	1.13771248856883	4.74681972121224E-09	1.66405918611919E-07
ENSG00000133835	HSD17B4	1.28090720173794	4.76157769918345E-09	1.66430152283276E-07
ENSG00000101557	USP14	2.15006913154736	4.75455944468488E-09	1.66430152283276E-07
ENSG00000213430	HSPD1P1	2.50603615307796	4.79060429679058E-09	1.6695150143587E-07
ENSG00000206418	RAB12	1.47756583586197	4.82254929679908E-09	1.67817623544348E-07
ENSG00000134453	RBM17	1.04435519441318	4.87739959435377E-09	1.69477102204395E-07
ENSG00000074319	TSG101	0.874038238553491	5.15907925493418E-09	1.79001895028603E-07
ENSG00000159461	AMFR	1.96027459258618	5.27829984952447E-09	1.82870291858415E-07
ENSG00000186834	HEXIM1	1.25034481016572	5.29516855140982E-09	1.83186510865513E-07
ENSG00000150867	PIP4K2A	1.40996318524488	5.93275959552157E-09	2.02578485294123E-07
ENSG00000148450	MSRB2	1.83644760194856	6.296242839902E-09	2.14371214849786E-07
ENSG00000075188	NUP37	1.42089365178273	6.49544826970242E-09	2.20519070883742E-07
ENSG00000204463	BAG6	0.953715836603697	6.93114246786613E-09	2.33634792332074E-07
ENSG00000112304	ACOT13	0.869556026664443	6.95820100502847E-09	2.3388055451987E-07
ENSG00000143870	PDIA6	1.42846441251024	7.19557097032816E-09	2.41173931828435E-07
ENSG00000181751	C5orf30	1.43183587415598	7.33568344976771E-09	2.45175533152335E-07
ENSG00000141101	NOB1	1.57374568289437	7.4672981647923E-09	2.49222392769366E-07
ENSG00000104368	PLAT	5.74931873025336	7.81429037603037E-09	2.58976965221298E-07
ENSG00000197077	KIAA1671	1.25938938568936	8.36351937008966E-09	2.76404970467083E-07
ENSG00000154832	CXXC1	1.38061680305123	8.44479383022821E-09	2.77926504039903E-07
ENSG00000165629	ATP5C1	0.983421370342986	9.25578845085576E-09	3.00851266638187E-07
ENSG00000148735	PLEKHS1	4.47008628851778	1.03342349139963E-08	3.34526676839801E-07
ENSG00000078070	MCCC1	1.07435849093061	1.04007674423504E-08	3.35304305161223E-07
ENSG00000112149	CD83	2.34610506774119	1.04198714923589E-08	3.35463155270324E-07
ENSG00000235655	H3F3AP4	2.21523493453789	1.04647461538401E-08	3.36450119889018E-07
ENSG00000065183	WDR3	1.42996311777889	1.08485346446924E-08	3.4737330892741E-07
ENSG00000167182	SP2	1.06977905005776	1.08973347425684E-08	3.4846436758567E-07
ENSG00000118705	RPN2	1.40705896040195	1.09915161668156E-08	3.50528634845497E-07
ENSG00000197601	FAR1	1.98641459782643	1.10524356634185E-08	3.51997018981793E-07
ENSG00000139350	NEDD1	1.67097351035554	1.12093179561738E-08	3.56035021203947E-07
ENSG00000139405	RITA1	1.21016654368623	1.13410150932926E-08	3.59253601275211E-07
ENSG00000123684	LPGAT1	1.04657041270016	1.1408135403112E-08	3.60896668507806E-07
ENSG00000168256	NKIRAS2	1.36307723698054	1.17298685866795E-08	3.70085173822128E-07
ENSG00000102547	CAB39L	2.23371715519582	1.17585163552463E-08	3.70495036636743E-07
ENSG00000106868	SUSD1	1.72616211399735	1.1845649828229E-08	3.72744164741201E-07
ENSG00000125863	MKKS	1.16688886804532	1.33825572646857E-08	4.17221940124188E-07
ENSG00000188706	ZDHHC9	1.30668892658847	1.34846777789746E-08	4.19852539847205E-07
ENSG00000125848	FLRT3	4.73643628656626	1.40594771779781E-08	4.36600273572829E-07
ENSG00000063015	SEZ6	1.91268600374363	1.41565311625646E-08	4.39038003800481E-07
ENSG00000101407	TTI1	0.907429949407511	1.46383204321183E-08	4.52201796847539E-07
ENSG00000152684	PELO	1.39732151828112	1.67004932377525E-08	5.11896077053027E-07
ENSG00000089234	BRAP	0.918659979668537	1.67529871252933E-08	5.1284079475526E-07
ENSG00000187079	TEAD1	1.47149196973961	1.7046636485341E-08	5.20597864724361E-07
ENSG00000081041	CXCL2	5.16489246566585	1.70503885881494E-08	5.20597864724361E-07
ENSG00000144231	POLR2D	0.858095268148346	1.71627828587584E-08	5.23354292251031E-07
ENSG00000111725	PRKAB1	1.2473578966357	1.77301061855369E-08	5.38571890460025E-07
ENSG00000152234	ATP5A1	1.17678776409759	1.8490693110108E-08	5.59520806987833E-07
ENSG00000132128	LRRC41	1.06949167998793	1.92953678457299E-08	5.80898586938304E-07
ENSG00000155100	OTUD6B	1.76221647709694	1.93488867209715E-08	5.8103135339892E-07
ENSG00000160058	BSDC1	1.0890482786841	1.98213493479315E-08	5.92212865681947E-07
ENSG00000108379	WNT3	2.9026221017197	2.08092913134476E-08	6.19383975283158E-07
ENSG00000123066	MED13L	1.38552611823786	2.15109659887694E-08	6.37063815009076E-07
ENSG00000114354	TFG	1.05374660095362	2.38373446893923E-08	6.98097880427092E-07
ENSG00000136754	ABI1	1.36863323641491	2.38298507361294E-08	6.98097880427092E-07
ENSG00000114270	COL7A1	2.92720210780789	2.3943171891695E-08	7.00330378829639E-07
ENSG00000132589	FLOT2	1.45925321152183	2.4076118734425E-08	7.03349626682344E-07
ENSG00000170142	UBE2E1	1.49681492259324	2.46488109373185E-08	7.17422894476958E-07
ENSG00000196935	SRGAP1	1.21334094111398	2.49054786666544E-08	7.22228359913043E-07
ENSG00000159111	MRPL10	1.30331050633498	2.49018258800888E-08	7.22228359913043E-07
ENSG00000173598	NUDT4	2.37910375573958	2.5222236195072E-08	7.3051869655323E-07
ENSG00000121964	GTDC1	1.76823928303703	2.5307915048851E-08	7.3210414890093E-07
ENSG00000117153	KLHL12	1.21814903920151	2.62781570031726E-08	7.55568433616096E-07
ENSG00000198948	MFAP3L	3.84544967225555	2.62786975812892E-08	7.55568433616096E-07
ENSG00000004139	SARM1	1.89420312939676	2.6963470556332E-08	7.73377701544828E-07
ENSG00000165238	WNK2	3.02460507676414	2.7317969686392E-08	7.8259699357033E-07
ENSG00000163527	STT3B	1.57775382468374	2.75930452335773E-08	7.89521438164618E-07
ENSG00000102226	USP11	1.43869724580339	2.78632183369712E-08	7.9628905254559E-07
ENSG00000244005	NFS1	0.837719705917192	2.79901912871467E-08	7.97998609157733E-07
ENSG00000164961	KIAA0196	1.32513160691519	2.9009502162746E-08	8.25062319323388E-07
ENSG00000070371	CLTCL1	3.3643225017246	2.90901272788001E-08	8.26362163023105E-07
ENSG00000083223	ZCCHC6	1.19058990422315	2.92279132138852E-08	8.29280707889888E-07
ENSG00000101577	LPIN2	1.40593822464602	2.97109163887652E-08	8.41975346715391E-07
ENSG00000068885	IFT80	1.87920671641229	3.06480353527794E-08	8.66456942118063E-07
ENSG00000106211	HSPB1	2.54877056226674	3.07335702220312E-08	8.67838272271987E-07
ENSG00000128791	TWSG1	1.69409344251557	3.16893878552807E-08	8.92697600975605E-07
ENSG00000134686	PHC2	1.197349674493	3.21661201920712E-08	9.03974943117555E-07
ENSG00000065150	IPO5	1.37976868968466	3.23568124201419E-08	9.07179208883669E-07
ENSG00000117859	OSBPL9	1.82234186760654	3.33421635276771E-08	9.31494233241349E-07
ENSG00000144455	SUMF1	1.13403853195987	3.39373960059118E-08	9.45889990209531E-07
ENSG00000084652	TXLNA	0.954874412143972	3.46192188091031E-08	9.62625822185436E-07
ENSG00000072274	TFRC	1.86272210664406	3.57930758082383E-08	9.92932652814001E-07
ENSG00000138085	ATRAID	1.56274734725685	3.70699376275014E-08	1.02714980571378E-06
ENSG00000109118	PHF12	1.13086472924462	3.73580733758117E-08	1.03392291262203E-06
ENSG00000065978	YBX1	1.46906477797941	3.81713560694468E-08	1.05273752758895E-06
ENSG00000144115	THNSL2	1.01884171062953	3.84129502683575E-08	1.05693679325598E-06
ENSG00000152223	EPG5	1.16740265657775	4.01060450071987E-08	1.09968637659947E-06
ENSG00000105926	MPP6	4.32819641333134	4.06231250143891E-08	1.11128902568265E-06
ENSG00000115758	ODC1	2.83653193220554	4.28799521170361E-08	0.0000011716724098677
ENSG00000125686	MED1	0.802958310448936	4.5129447183784E-08	1.22465379439207E-06
ENSG00000119318	RAD23B	1.09222910099866	4.61632036916118E-08	1.24983968987942E-06
ENSG00000169016	E2F6	1.43559209896363	4.72200711437821E-08	1.27553486698095E-06
ENSG00000123975	CKS2	2.57406702224001	4.87461352195053E-08	1.30928467389234E-06
ENSG00000131669	NINJ1	1.68812240322672	4.88603836928249E-08	1.31086537338244E-06
ENSG00000131236	CAP1	1.17065176671814	4.97031221449952E-08	0.0000013319648689887
ENSG00000165119	HNRNPK	1.1980087118064	5.07667926214781E-08	1.35433440112969E-06
ENSG00000104231	ZFAND1	1.13949433638161	5.22917015035003E-08	1.39256371725909E-06
ENSG00000167653	PSCA	5.0056632855203	5.2317506006987E-08	1.39256371725909E-06
ENSG00000156983	BRPF1	0.93541986408624	5.24819425668452E-08	1.39537101905535E-06
ENSG00000163879	DNALI1	2.52428338231108	5.3229491696797E-08	1.41207338791626E-06
ENSG00000139372	TDG	1.19983740010642	5.36794401468116E-08	1.42082392862864E-06
ENSG00000087460	GNAS	1.05013759519827	5.52112981676211E-08	0.000001458108201496
ENSG00000117419	ERI3	1.17728274257729	5.68493735549939E-08	1.49469636270202E-06
ENSG00000143333	RGS16	3.86751432197383	5.69495773869624E-08	1.49566908957568E-06
ENSG00000073060	SCARB1	1.94301155981029	5.8367538848916E-08	1.52951392223909E-06
ENSG00000085998	POMGNT1	1.36807320272068	5.91374242492736E-08	1.54626394476305E-06
ENSG00000154059	IMPACT	1.15178841020911	6.03228052158968E-08	1.57378008800856E-06
ENSG00000048540	LMO3	4.18089826768259	6.15450663528739E-08	0.0000016019991230212
ENSG00000116525	TRIM62	1.65351418484604	6.18682707393807E-08	1.60610406705936E-06
ENSG00000138074	SLC5A6	1.91860891869862	6.23834571319013E-08	1.61507630865665E-06
ENSG00000004897	CDC27	1.20593659321806	6.41805957873695E-08	1.65978736406177E-06
ENSG00000130826	DKC1	1.36631259865102	6.50602921140102E-08	1.67886771242511E-06
ENSG00000132773	TOE1	1.46525734551054	6.62386609602554E-08	1.70741332712693E-06
ENSG00000188647	PTAR1	1.29291490535672	6.65713020334212E-08	1.71412047879962E-06
ENSG00000003056	M6PR	0.995434099387931	6.71172727790576E-08	1.72630002801178E-06
ENSG00000163444	TMEM183A	0.927097706964769	6.80190321175315E-08	1.74380753737502E-06
ENSG00000254999	BRK1	1.21413335572046	6.9151661669498E-08	1.77092615810101E-06
ENSG00000153292	ADGRF1	4.97903734232069	6.92931069798073E-08	1.77263004374398E-06
ENSG00000084693	AGBL5	1.41429169820192	7.29993563831247E-08	1.86171757063996E-06
ENSG00000140391	TSPAN3	2.41780489555232	7.39905488104394E-08	1.88262188871121E-06
ENSG00000213995	NAXD	1.17230512131092	7.46383989331269E-08	1.89706598706185E-06
ENSG00000117481	NSUN4	0.896025804157243	7.55951532771759E-08	1.91932200858134E-06
ENSG00000182117	NOP10	1.76946499517318	7.60707239812321E-08	1.92932641111243E-06
ENSG00000197409	HIST1H3D	3.37025332279725	8.30805620976364E-08	2.09811669254682E-06
ENSG00000093010	COMT	1.09888464860195	8.42873940026484E-08	2.12632473804336E-06
ENSG00000104413	ESRP1	0.68869034222492	8.81915936618014E-08	2.21536908791848E-06
ENSG00000163486		1.47503533784797	9.16954835966768E-08	2.29850659782644E-06
ENSG00000135679	MDM2	1.75260679800153	9.29267355734256E-08	2.32690512579256E-06
ENSG00000198720	ANKRD13B	2.53441984824844	1.02907276563277E-07	2.54983757624797E-06
ENSG00000186564	FOXD2	1.88720830334282	1.03633966642007E-07	2.56247706650974E-06
ENSG00000172403	SYNPO2	5.73971466446413	1.07474554345526E-07	2.64913581195644E-06
ENSG00000127080	IPPK	1.25351763121188	1.09631459247044E-07	2.69108840265852E-06
ENSG00000115844	DLX2	4.59233172619628	1.10472022505779E-07	0.0000027061071103046
ENSG00000138279	ANXA7	0.892260006255506	1.12479121683465E-07	0.0000027524234295717
ENSG00000172301	COPRS	1.25422410661027	1.16588739127321E-07	0.0000028353949989412
ENSG00000078043	PIAS2	1.72968136239918	1.18975785548193E-07	0.0000028845532924456
ENSG00000180182	MED14	0.814490730527422	1.20767018244542E-07	2.92199381668772E-06
ENSG00000266208	CTD-2267D19.3	2.2502460391359	1.23151496088577E-07	2.96754974739715E-06
ENSG00000111145	ELK3	1.38392182968444	1.25026496346554E-07	0.0000030035553127396
ENSG00000166166	TRMT61A	1.22335127603246	1.28687725480334E-07	3.08212312554773E-06
ENSG00000152492	CCDC50	1.06081590016529	1.28901772200959E-07	3.08412804407614E-06
ENSG00000069345	DNAJA2	1.04465128966591	1.30536250772131E-07	3.12008010305145E-06
ENSG00000101224	CDC25B	1.92229661030088	1.31945788443667E-07	3.15058848833752E-06
ENSG00000158089	GALNT14	2.56969270604941	1.40234148723815E-07	3.32834569834668E-06
ENSG00000134463	ECHDC3	2.07786382544699	1.4075483848898E-07	3.33735645607689E-06
ENSG00000120800	UTP20	2.29167642621774	1.41779571023556E-07	3.35828827740781E-06
ENSG00000142149	HUNK	3.03874576589995	1.44309099572167E-07	3.40797028261096E-06
ENSG00000170892	TSEN34	1.20951297125376	1.49769580424969E-07	3.52636575283189E-06
ENSG00000172992	DCAKD	1.18643769975598	1.5387090985338E-07	3.61215013875052E-06
ENSG00000141627	DYM	0.901537980282904	1.58893361336553E-07	3.71898477676246E-06
ENSG00000203879	GDI1	1.00010322002666	1.61687312704645E-07	3.77318232793888E-06
ENSG00000145996	CDKAL1	0.748455851825986	1.67923149221327E-07	3.91484283746232E-06
ENSG00000197763	TXNRD3	1.26041081756346	1.7044293896271E-07	3.96187747021081E-06
ENSG00000102893	PHKB	1.40936492843696	1.73912314868021E-07	4.03855456989401E-06
ENSG00000099822	HCN2	2.45268131538461	1.76930116137792E-07	0.000004100585052075
ENSG00000102174	PHEX	2.8232751840918	1.85224873383987E-07	4.27968002402859E-06
ENSG00000196374		3.23124870333355	1.85381060078152E-07	4.27968002402859E-06
ENSG00000117592	PRDX6	0.808467745808974	1.85892309191993E-07	4.28326280681362E-06
ENSG00000126247	CAPNS1	1.24855887229238	1.88532112372469E-07	4.33129648065023E-06
ENSG00000161326		2.06923057989738	1.95681671451575E-07	4.48683661972735E-06
ENSG00000204272	LINC01420	1.72941508922465	1.99451924450688E-07	0.0000045556282705373
ENSG00000221926	TRIM16	1.3339790069917	1.99935328180357E-07	0.0000045622658348426
ENSG00000134533	RERG	2.04294933824944	2.01108955039259E-07	4.58462543650672E-06
ENSG00000184752	NDUFA12	1.78723961891064	2.06313395710627E-07	4.69422488721208E-06
ENSG00000176749	CDK5R1	1.73411510712727	2.20695622436198E-07	4.99265823490225E-06
ENSG00000065665	SEC61A2	1.39904283621138	2.23103708855375E-07	5.03270072702072E-06
ENSG00000180777	ANKRD30B	5.1289894822848	2.23066671064751E-07	5.03270072702072E-06
ENSG00000176261	ZBTB8OS	1.17732122555833	2.25520888475974E-07	5.07067234623487E-06
ENSG00000172458	IL17D	1.69323976481354	2.26081081894082E-07	5.07567043724825E-06
ENSG00000198585	NUDT16	1.40817405013688	2.27534781098076E-07	5.10346495272396E-06
ENSG00000115204	MPV17	1.22481262560419	2.2838541241144E-07	0.0000051176931949734
ENSG00000049759	NEDD4L	1.28481681501457	2.29410544077253E-07	5.13580104493855E-06
ENSG00000116922	C1orf109	0.777565722545951	2.30837014337118E-07	0.0000051628509170692
ENSG00000168090	COPS6	1.07840437647145	2.32101435193023E-07	5.18133609525707E-06
ENSG00000204525	HLA-C	3.09905928092486	2.3265416699275E-07	5.18877997507016E-06
ENSG00000228474	OST4	1.58064529320956	2.36382796412855E-07	5.26201891958361E-06
ENSG00000070061	IKBKAP	0.8245974571006	2.37445470890752E-07	5.27574852365057E-06
ENSG00000071462	WBSCR22	1.07985548597146	2.40135701280208E-07	5.32552118031261E-06
ENSG00000141179	PCTP	1.67629748882815	2.42797467435926E-07	5.36945464666946E-06
ENSG00000167306	MYO5B	1.34433652696513	2.44967878942957E-07	5.39727646129162E-06
ENSG00000101443	WFDC2	3.92216826856311	2.44790948937807E-07	5.39727646129162E-06
ENSG00000126858	RHOT1	0.996417101619233	2.53449758277788E-07	5.56859947087029E-06
ENSG00000116133	DHCR24	1.5628910341254	2.54889757145722E-07	5.58468178086965E-06
ENSG00000067177	PHKA1	1.64393635144682	2.64648640369583E-07	0.0000057877826035725
ENSG00000213160	KLHL23	1.80062509438694	2.64898884992568E-07	5.78790610856799E-06
ENSG00000124217	MOCS3	0.962989726084059	2.65236318620778E-07	5.78993266376704E-06
ENSG00000157350	ST3GAL2	1.94559781758285	2.72465148509243E-07	5.92586655254984E-06
ENSG00000087152	ATXN7L3	1.2421140060851	2.7282910782852E-07	5.92833349728767E-06
ENSG00000141698	NT5C3B	1.38568955920177	2.75322902201751E-07	5.97703287596334E-06
ENSG00000115241	PPM1G	1.37275631340874	2.7961683709812E-07	0.0000060591329819165
ENSG00000196950	SLC39A10	1.42518482692661	2.81364191416425E-07	6.08687176568519E-06
ENSG00000112312	GMNN	2.84765480602148	2.81411389581186E-07	6.08687176568519E-06
ENSG00000120860	CCDC53	1.44528520169413	2.84427404722531E-07	6.13528320688172E-06
ENSG00000033030	ZCCHC8	0.886911438925744	2.93688701613789E-07	6.30631192948012E-06
ENSG00000168036	CTNNB1	0.788674656576628	3.0131499785194E-07	6.44666979581415E-06
ENSG00000119401	TRIM32	1.14467187747959	3.01646267376906E-07	6.44792739380283E-06
ENSG00000130429	ARPC1B	1.80443609720815	3.05236264825161E-07	6.51877773877057E-06
ENSG00000156795	WDYHV1	1.24167549187344	3.09105778217146E-07	6.58952254950659E-06
ENSG00000084764	MAPRE3	1.61270517797138	3.09710324501602E-07	6.59646751456472E-06
ENSG00000169189	NSMCE1	1.26359791842012	3.19903899194194E-07	6.77697937925893E-06
ENSG00000196449	YRDC	1.38164640798464	3.22217706529868E-07	0.0000068137958799073
ENSG00000198794	SCAMP5	2.57502566368009	3.22910533090926E-07	6.81626400047331E-06
ENSG00000067596	DHX8	1.0364429472497	3.2694774460459E-07	6.88919366035477E-06
ENSG00000119509	INVS	1.6058204086398	3.27633259256295E-07	0.0000068974962756065
ENSG00000105254	TBCB	1.17887919219273	3.30117026831759E-07	6.93744156831252E-06
ENSG00000107959	PITRM1	0.905934219198308	3.33205248785215E-07	6.98992535638702E-06
ENSG00000108262	GIT1	1.16797416510979	3.37238497457639E-07	7.05576884645456E-06
ENSG00000134308	YWHAQ	0.921707903925504	3.41082509234404E-07	7.12398736162517E-06
ENSG00000165113	GKAP1	1.39775699106625	3.41101199371226E-07	7.12398736162517E-06
ENSG00000147164	SNX12	0.707296632195425	3.44266187022754E-07	7.17110104183047E-06
ENSG00000104381	GDAP1	2.58009544418291	3.51372649739969E-07	7.30626626607812E-06
ENSG00000151176	PLBD2	1.51294456467093	3.78127926766171E-07	7.81920375601216E-06
ENSG00000139197	PEX5	0.965527966354676	3.84855066641072E-07	7.93277477519834E-06
ENSG00000114054	PCCB	1.03506853724901	3.91779113177377E-07	8.06145143923155E-06
ENSG00000173065	FAM222B	1.02908980064667	3.95339751688862E-07	8.12059422240758E-06
ENSG00000198231	DDX42	0.553557860604316	4.06843001161995E-07	8.34963220858307E-06
ENSG00000086598	TMED2	1.09419097994397	4.1294870685226E-07	8.46759553747402E-06
ENSG00000164620	RELL2	2.3685598999997	4.14789341018817E-07	8.49797417881236E-06
ENSG00000028203	VEZT	0.944981472579904	4.22736366951411E-07	8.64581733031221E-06
ENSG00000150667	FSIP1	5.35949805823778	4.23841131098801E-07	8.66092632572619E-06
ENSG00000168488	ATXN2L	0.940607938449687	4.24775986862281E-07	8.67031622248945E-06
ENSG00000111596	CNOT2	0.876083099395715	4.26210722109374E-07	8.68684265053756E-06
ENSG00000176624	MEX3C	0.853974013881603	4.34985257469756E-07	8.85805176205408E-06
ENSG00000144524	COPS7B	0.734986257644101	4.39433507456312E-07	8.94094160527834E-06
ENSG00000131462	TUBG1	1.59941002796286	4.41091222125962E-07	8.96696012815003E-06
ENSG00000136003	ISCU	1.16268257121974	4.45019255918228E-07	9.02355668619797E-06
ENSG00000004455	AK2	0.923911962026312	4.48495917330985E-07	9.07073409555821E-06
ENSG00000079785	DDX1	0.934697396959899	4.61861208251649E-07	9.33306726802628E-06
ENSG00000101004	NINL	1.00544166933081	4.83205912869007E-07	9.73115022656963E-06
ENSG00000106733	NMRK1	1.53571297589326	5.06263913860844E-07	0.0000101523076217705
ENSG00000215193	PEX26	0.946831531279316	5.18037245867822E-07	0.0000103708251683336
ENSG00000086475	SEPHS1	1.09687000773099	5.22814447871751E-07	0.0000104576147759842
ENSG00000156471	PTDSS1	1.64864209986979	5.27894305096673E-07	0.0000105414033261625
ENSG00000163811	WDR43	1.31768512782423	5.32907249569898E-07	0.0000106146332041856
ENSG00000126581	BECN1	1.09876784836879	5.3788025027865E-07	0.0000107046765032327
ENSG00000230989	HSBP1	1.31623974663816	5.38878883964374E-07	0.0000107155386817218
ENSG00000119185	ITGB1BP1	1.03201545557291	5.41333149806164E-07	0.0000107462804730396
ENSG00000119421	NDUFA8	1.00726397243706	5.42525283222817E-07	0.0000107609185053659
ENSG00000119471	HSDL2	1.34790843331254	5.43898437345766E-07	0.0000107791195334279
ENSG00000163704	PRRT3	1.47894876222008	5.54730462295783E-07	0.000010975407131526
ENSG00000114770	ABCC5	2.21829097279862	5.73448706110328E-07	0.0000113079306105739
ENSG00000084754	HADHA	0.915989351828991	5.79334596603616E-07	0.0000113955066994442
ENSG00000100030	MAPK1	0.907308676949066	5.86717537079646E-07	0.00001151202079595
ENSG00000136937	NCBP1	1.34444090945974	5.86276199461724E-07	0.00001151202079595
ENSG00000187244	BCAM	1.36061611899625	5.89823580846965E-07	0.0000115538041337597
ENSG00000115884	SDC1	2.49888097533064	5.92692639180512E-07	0.0000116004019197092
ENSG00000108883	EFTUD2	1.03935762542736	5.98860151809288E-07	0.0000117114279109613
ENSG00000173226	IQCB1	1.11993492426623	6.08023471357266E-07	0.0000118514492608954
ENSG00000206503	HLA-A	3.20814260143698	6.16107993802936E-07	0.0000119991468784847
ENSG00000141391	PRELID3A	2.19515770209531	6.3744687827863E-07	0.0000123638569513994
ENSG00000130508	PXDN	2.19200558675771	6.52276253567223E-07	0.000012610141330197
ENSG00000173660	UQCRH	1.63578368884999	6.63773942254031E-07	0.0000127906211690205
ENSG00000197969	VPS13A	1.78950314001932	6.7654023373817E-07	0.0000130154240251596
ENSG00000127334	DYRK2	1.03099582180163	0.0000006933717886716	0.000013301130999192
ENSG00000081760	AACS	1.28597888855417	6.9363967599218E-07	0.000013301130999192
ENSG00000158966	CACHD1	2.55271956491257	6.9479812876995E-07	0.0000133125571830634
ENSG00000103479	RBL2	1.36156486597445	7.06944191493905E-07	0.0000135124558992894
ENSG00000182165	TP53TG1	1.72941446910133	7.24177742561849E-07	0.0000137972769100169
ENSG00000136243	NUPL2	0.904554876876573	7.51058108600651E-07	0.0000142749301396122
ENSG00000239467	AC007405.6	2.95017547226129	7.5420164375235E-07	0.0000143231729503305
ENSG00000060069	CTDP1	1.24093519470473	7.61585627158247E-07	0.0000144286634871462
ENSG00000128789	PSMG2	1.33865750232833	7.66902912748933E-07	0.0000145022757454046
ENSG00000150556	LYPD6B	2.66307118995127	7.67309691638701E-07	0.0000145022757454046
ENSG00000033867	SLC4A7	2.02598120156131	7.87522530112274E-07	0.0000148528934285136
ENSG00000114631	PODXL2	1.58655521360363	8.28616897742642E-07	0.000015500048736193
ENSG00000155097	ATP6V1C1	1.20975398545306	8.44629736490332E-07	0.0000157622030398823
ENSG00000089356	FXYD3	1.69278637112198	8.55013458788003E-07	0.0000159308531301579
ENSG00000134755	DSC2	1.36746237618924	8.72511390713627E-07	0.0000161804365505145
ENSG00000233198	RNF224	2.25866220440586	8.89565633260048E-07	0.0000164580074900958
ENSG00000116044	NFE2L2	1.26968391654412	8.93365534713579E-07	0.0000165153973811933
ENSG00000106397	PLOD3	1.47680388825397	9.00506175834859E-07	0.0000166084782843182
ENSG00000198015	MRPL42	1.30944868847187	9.01665615941494E-07	0.000016616910802199
ENSG00000163864	NMNAT3	2.28446146681312	9.06950498783188E-07	0.0000167012993406277
ENSG00000145912	NHP2	1.18774134223768	9.12803034188422E-07	0.0000167960017091762
ENSG00000198522	GPN1	1.09936637415636	9.14918505591919E-07	0.000016821846618354
ENSG00000164181	ELOVL7	2.63342264947305	9.40209655998979E-07	0.0000172600318773498
ENSG00000114026	OGG1	0.845743311729345	9.48510106346373E-07	0.0000173719772805528
ENSG00000133193	FAM104A	0.96727427059267	9.91021896501643E-07	0.0000181085336964621
ENSG00000186260	MKL2	0.85294163246867	9.94283162411218E-07	0.0000181392831624403
ENSG00000110880	CORO1C	1.16946969517283	9.95004418072412E-07	0.0000181392831624403
ENSG00000151276	MAGI1	0.960317972078007	9.97433060909024E-07	0.0000181695600618093
ENSG00000197903	HIST1H2BK	1.73465447228006	1.00731797583121E-06	0.0000183355117400722
ENSG00000104870	FCGRT	1.83545089242583	1.03064504525432E-06	0.0000187025718603167
ENSG00000165030	NFIL3	2.05198432215845	1.03179526999472E-06	0.0000187090969148544
ENSG00000129559	NEDD8	1.28752348243133	1.07268775273134E-06	0.0000193763437350241
ENSG00000151136	BTBD11	3.03652087839028	1.07861408198511E-06	0.0000194536928521446
ENSG00000147642	SYBU	1.94497224836946	1.08972499157153E-06	0.0000196391184124579
ENSG00000070756	PABPC1	1.40107147714018	1.09410576685249E-06	0.0000197030629840415
ENSG00000179862	CITED4	3.4875642936773	1.10108504716516E-06	0.0000198136695597485
ENSG00000253313	C1orf210	1.23676616103978	1.10602799372822E-06	0.0000198874927170144
ENSG00000152464	RPP38	1.01768369740562	1.10868927228215E-06	0.0000199202082384302
ENSG00000113583	C5orf15	1.0140137458931	1.11378232438089E-06	0.0000199965334915212
ENSG00000055917	PUM2	0.793884996345185	1.11796446829748E-06	0.0000200564012231413
ENSG00000150510	FAM124A	3.14562130931153	1.19614442773876E-06	0.0000212604626842683
ENSG00000047457	CP	6.22585330675265	1.21796469775434E-06	0.0000216047216214099
ENSG00000165115	KIF27	0.922323385053505	1.26761153711834E-06	0.0000224685331856413
ENSG00000143970	ASXL2	0.86913931299868	1.28705117797836E-06	0.0000227789768320882
ENSG00000179041	RRS1	1.69880392626632	1.29037934932845E-06	0.0000228037688895886
ENSG00000204469	PRRC2A	1.00262323406306	1.31044022014989E-06	0.0000230721331319992
ENSG00000108671	PSMD11	1.35886876406737	1.31425900549112E-06	0.0000231049857703837
ENSG00000090857	PDPR	1.38927655354765	0.0000013153661502268	0.0000231072822663822
ENSG00000240771	ARHGEF25	2.57729150239581	1.32288210408799E-06	0.0000232220765794022
ENSG00000141699	FAM134C	1.05974299505098	1.33757203633308E-06	0.0000234451608116664
ENSG00000128944	KNSTRN	1.33691868869714	1.35729356074867E-06	0.0000237556490591685
ENSG00000213713	PIGCP1	2.06727838771241	1.40915650124844E-06	0.0000245906123075529
ENSG00000132879	FBXO44	1.26122210515706	1.44525206087278E-06	0.0000251833575231463
ENSG00000111726	CMAS	1.0244479714815	0.0000014643697381098	0.000025478956700656
ENSG00000087088	BAX	1.39539046676532	0.0000014710832966332	0.0000255769610934838
ENSG00000114923	SLC4A3	1.27367093528369	1.49045237723532E-06	0.0000258946950091919
ENSG00000084676	NCOA1	1.24767831724733	1.54278313366846E-06	0.0000267102602132296
ENSG00000247746	USP51	2.12273521047483	1.54303874029011E-06	0.0000267102602132296
ENSG00000156504	FAM122B	1.24260401616136	1.55474017425312E-06	0.0000268538808345632
ENSG00000049656	CLPTM1L	0.905467371675672	1.57387949326516E-06	0.0000271448326888728
ENSG00000146109	ABT1	0.947896152010723	1.61419007253893E-06	0.0000278197958386662
ENSG00000125977	EIF2S2	1.11947011089977	1.67885093630345E-06	0.0000287665819737498
ENSG00000148082	SHC3	2.14964552851013	1.73415552125439E-06	0.0000296070145017624
ENSG00000144580	CNOT9	0.79263154051265	1.73736014716156E-06	0.0000296403411407959
ENSG00000132155	RAF1	0.464624619045929	1.75851764861612E-06	0.0000299796852443827
ENSG00000117410	ATP6V0B	1.2876800284879	1.76160078293345E-06	0.0000300106258650498
ENSG00000123358	NR4A1	2.34874928425426	0.0000017668879383709	0.0000300790426515616
ENSG00000088682	COQ9	0.805738567523775	1.79038298235661E-06	0.0000304571046092771
ENSG00000226742	HSBP1L1	1.54235013224877	1.83509127697156E-06	0.0000311058487729068
ENSG00000104312	RIPK2	1.32126006768245	1.86209443873137E-06	0.0000315184125205296
ENSG00000213062	RP1-206D15.6	1.91047980943088	0.0000018755696007348	0.0000316785178174072
ENSG00000200959	SNORA74A	3.9009793544813	1.87432267642359E-06	0.0000316785178174072
ENSG00000174574	AKIRIN1	1.4403933105894	1.93490712643422E-06	0.0000325645144614601
ENSG00000214078	CPNE1	0.905348789661579	1.95865475318076E-06	0.0000329173632276394
ENSG00000078401	EDN1	3.65771153593005	1.98246712429778E-06	0.000033246718329028
ENSG00000132591	ERAL1	0.918732681846539	2.00503393716571E-06	0.0000335167258825613
ENSG00000147677	EIF3H	1.2769666192008	2.00711663336545E-06	0.0000335175729677675
ENSG00000086015	MAST2	1.08010847705041	2.03028003661075E-06	0.0000338566007796478
ENSG00000131773	KHDRBS3	2.99944591321448	2.10243661059162E-06	0.0000348877682443404
ENSG00000147669	POLR2K	1.59383338630993	2.19017825249525E-06	0.0000361662163215598
ENSG00000183624	HMCES	0.795000928755426	2.22181714566027E-06	0.000036561098134742
ENSG00000092847	AGO1	1.71383572533725	2.31830599968758E-06	0.0000380430477604765
ENSG00000124243	BCAS4	1.02827115755469	2.39436432675675E-06	0.0000391824640830187
ENSG00000126267	COX6B1	1.29355009169773	2.40347952463725E-06	0.0000392773038615271
ENSG00000136436	CALCOCO2	0.84887349743045	2.41295520845391E-06	0.0000393712925982168
ENSG00000166377	ATP9B	1.02466051658059	2.41588627192709E-06	0.0000393712925982168
ENSG00000063245	EPN1	1.07368836796415	2.41368221640267E-06	0.0000393712925982168
ENSG00000123908	AGO2	0.74417478590297	0.0000024368701730984	0.0000396313806914278
ENSG00000197448	GSTK1	1.1587434433424	2.44434692697647E-06	0.0000397256739924754
ENSG00000240857	RDH14	1.1790993757732	2.48696704158909E-06	0.0000403076034966594
ENSG00000123124	WWP1	1.3698550002399	2.49616695190702E-06	0.0000404013670198194
ENSG00000218891	ZNF579	1.34744657639519	2.51966475152791E-06	0.0000407259747372984
ENSG00000154582	TCEB1	1.34869837178245	2.53595854792294E-06	0.000040933415497613
ENSG00000136925	TSTD2	1.4051015914222	2.58411766655022E-06	0.0000416823287958949
ENSG00000101146	RAE1	0.803198141398458	2.64981656715909E-06	0.0000426258391765368
ENSG00000162783	IER5	2.59179049522963	2.67069918651083E-06	0.0000429325780233735
ENSG00000182150	ERCC6L2	0.86563331360809	0.0000026985422729604	0.000043293111812195
ENSG00000132541	RIDA	1.62894805652816	2.69861555690266E-06	0.000043293111812195
ENSG00000174206	C12orf66	1.24850873703755	2.76886690519513E-06	0.0000443299712974508
ENSG00000108773	KAT2A	1.44839124461842	2.77811357619105E-06	0.0000444479388461183
ENSG00000137868	STRA6	4.34182996025469	2.79977022487104E-06	0.0000447641640750834
ENSG00000124164	VAPB	0.689070506074393	2.80891153544121E-06	0.00004484971232331
ENSG00000121900	TMEM54	1.46268065865078	2.84534091253244E-06	0.0000454007430972725
ENSG00000180198	RCC1	1.06339458304182	2.87235909307171E-06	0.0000458009657812371
ENSG00000154917	RAB6B	2.55088592436898	2.90426120076229E-06	0.0000462473302783567
ENSG00000132768	DPH2	1.38581850657395	2.96328526228763E-06	0.0000470921552461465
ENSG00000175279	APITD1	2.68696847532827	2.99479607813212E-06	0.0000474972249308581
ENSG00000196505	GDAP2	1.03675416124236	3.00736255107741E-06	0.000047632677407058
ENSG00000101546	RBFA	1.18116539092366	3.08715343434161E-06	0.000048788981409631
ENSG00000152242	C18orf25	1.0664654418185	3.14548714342411E-06	0.0000495880494835742
ENSG00000135720	DYNC1LI2	0.828136729506597	3.24249175748481E-06	0.0000509814501377828
ENSG00000136938	ANP32B	1.5004267149173	3.26641634563316E-06	0.0000512894558637806
ENSG00000160602	NEK8	1.19939021206597	3.27004173523282E-06	0.000051312332613272
ENSG00000141655	TNFRSF11A	3.28520602673921	3.27889270863125E-06	0.0000513830716320141
ENSG00000188313	PLSCR1	3.70268860718676	3.29810317864812E-06	0.0000516499109969228
ENSG00000175387	SMAD2	0.864696651483087	3.30578934421415E-06	0.0000517360405106742
ENSG00000065809	FAM107B	2.14149309483864	3.31220164627474E-06	0.0000518021332159942
ENSG00000203995	ZYG11A	1.53457991756369	3.32119220081521E-06	0.0000518741723088385
ENSG00000179820	MYADM	2.08377526837978	3.42714172912453E-06	0.0000533178532125403
ENSG00000197713	RPE	0.967791033085765	3.46009547461645E-06	0.0000537245664145991
ENSG00000154845	PPP4R1	1.05921967979962	3.47766411414954E-06	0.0000539265831802887
ENSG00000151694	ADAM17	0.986702042705476	3.48281015747868E-06	0.0000539710129380603
ENSG00000165806	CASP7	1.30580846279611	3.54198101244608E-06	0.0000547088098547725
ENSG00000102781	KATNAL1	1.52777229817834	3.59247470140036E-06	0.000055452530240859
ENSG00000136943	CTSV	2.1119752315402	0.0000037013285207254	0.0000568858432165123
ENSG00000213762	ZNF134	1.26189583980369	3.72132130168447E-06	0.0000571431706435818
ENSG00000136891	TEX10	1.05717913075352	3.73439904838811E-06	0.0000573067994046744
ENSG00000079308	TNS1	1.77545423248576	0.0000037560674976161	0.0000575273949489255
ENSG00000152240	HAUS1	1.78435800943334	0.0000037513866937891	0.0000575273949489255
ENSG00000021300	PLEKHB1	3.03395244484151	3.79272737985125E-06	0.0000579762971507882
ENSG00000168056	LTBP3	1.1547942927335	3.87043367532535E-06	0.0000590496918499186
ENSG00000149679	CABLES2	0.933966206450827	3.98356973285634E-06	0.0000607366047606827
ENSG00000160606	TLCD1	1.73404179282072	3.99583719367562E-06	0.0000608844143682848
ENSG00000141664	ZCCHC2	1.51390741078644	0.0000041249877029687	0.0000626505674039462
ENSG00000164970	FAM219A	1.2942996115056	4.15259818216355E-06	0.0000629890581952155
ENSG00000179295	PTPN11	0.869615671341107	4.19553874518857E-06	0.0000635996369810359
ENSG00000164626	KCNK5	4.50076775978851	4.24662144747814E-06	0.0000643327806092671
ENSG00000048392	RRM2B	1.43679769623289	4.36866483719051E-06	0.0000658863709639509
ENSG00000067191	CACNB1	2.05720295989792	4.45083470785029E-06	0.0000670401665766145
ENSG00000171103	TRMT61B	1.08204380826735	4.45700421302539E-06	0.0000670553689627568
ENSG00000164944	KIAA1429	0.868951570498316	4.46591203839266E-06	0.0000671390575377926
ENSG00000169398	PTK2	0.801636702746082	4.52244846783361E-06	0.0000679458400599026
ENSG00000101166	PRELID3B	1.10458085737595	4.52667296214488E-06	0.0000679661562837781
ENSG00000160075	SSU72	0.688087931046504	0.0000046887002005551	0.000070087626560793
ENSG00000134452	FBXO18	0.805586905089381	4.80430643737449E-06	0.0000716347216304931
ENSG00000139112	GABARAPL1	3.67805842871284	0.0000048106017980302	0.0000716834196138468
ENSG00000143147	GPR161	2.77021574077217	4.85391005495923E-06	0.0000721470311749373
ENSG00000128699	ORMDL1	1.09415402521043	4.87566731324306E-06	0.0000724249313454304
ENSG00000004478	FKBP4	1.39045087265196	4.91065271454386E-06	0.0000728988551971464
ENSG00000168792	ABHD15	1.51310684337775	4.91542108150314E-06	0.0000729238928223252
ENSG00000114544	SLC41A3	1.11608739010622	5.02174165800343E-06	0.0000744079354122324
ENSG00000114383	TUSC2	0.895276415013013	5.04189598562286E-06	0.0000746598152113854
ENSG00000158122	AAED1	1.80681886248024	5.08066318141034E-06	0.0000751398330385706
ENSG00000145103	ILDR1	1.4079586570566	5.08589743702813E-06	0.000075170262993377
ENSG00000165609	NUDT5	1.072154737091	5.13805845747848E-06	0.0000758464611848491
ENSG00000001629	ANKIB1	0.95038891271942	5.18728565465476E-06	0.0000765253992806082
ENSG00000148090	AUH	1.16288987809486	5.23160603066499E-06	0.0000771311486003898
ENSG00000107186	MPDZ	1.26898613504782	5.28871588428518E-06	0.0000778760945674177
ENSG00000138696	BMPR1B	6.55323848601948	5.31982770152492E-06	0.0000782368445625756
ENSG00000099968	BCL2L13	0.811300211577591	5.34579431057806E-06	0.0000785698948889494
ENSG00000172466	ZNF24	1.05218674548632	5.57925217139514E-06	0.0000816966857250762
ENSG00000176148	TCP11L1	1.41460036889701	5.57663677618817E-06	0.0000816966857250762
ENSG00000057608	GDI2	0.893454325872214	5.65232801249812E-06	0.0000826644238317324
ENSG00000132341	RAN	1.23290146783356	5.66132953355223E-06	0.0000827449294332591
ENSG00000119013	NDUFB3	1.32997630257026	5.77938442024812E-06	0.0000842966140629026
ENSG00000124160	NCOA5	0.954079642887809	5.89035240406491E-06	0.0000855637869474451
ENSG00000106692	FKTN	1.22585643347257	6.03344435346744E-06	0.000087481246161826
ENSG00000122126	OCRL	0.760513628467561	6.04184211256334E-06	0.0000875493630799671
ENSG00000158470	B4GALT5	1.31481423550215	6.05037943938044E-06	0.0000875658279352045
ENSG00000163781	TOPBP1	1.03908139097807	6.21109645323151E-06	0.0000897820252735597
ENSG00000142949	PTPRF	1.17206164562355	0.0000063055765073215	0.0000909810103004565
ENSG00000178028	DMAP1	0.741239504109746	6.35042752195441E-06	0.0000915723134990903
ENSG00000139436	GIT2	0.877666213244599	6.37721139064044E-06	0.0000919025293159102
ENSG00000125304	TM9SF2	0.842901303764636	6.46602320930546E-06	0.00009301246638407
ENSG00000176731	C8orf59	2.05026518958182	6.64144296486802E-06	0.0000952463423501042
ENSG00000154102	C16orf74	2.42403609536904	6.69107514602615E-06	0.0000958419559203492
ENSG00000196305	IARS	1.23054719031229	6.73048615739498E-06	0.000096231718394222
ENSG00000112893	MAN2A1	1.30773723312224	6.76301644809827E-06	0.0000965801196206091
ENSG00000179981	TSHZ1	1.34036085253249	6.87673863205728E-06	0.0000980266664158864
ENSG00000058673	ZC3H11A	0.781948272404771	6.93342655819605E-06	0.0000987158078499357
ENSG00000185298	CCDC137	1.26786847118347	7.09037398904838E-06	0.000100768480302013
ENSG00000134882	UBAC2	0.842645056377571	7.13972397038564E-06	0.000101408936561366
ENSG00000157837	SPPL3	0.69315196550177	7.23088062264545E-06	0.000102519070205907
ENSG00000185164	NOMO2	1.52767843190813	7.39656632931513E-06	0.000104556310872735
ENSG00000158457	TSPAN33	2.4212878821838	7.39666417618048E-06	0.000104556310872735
ENSG00000170855	TRIAP1	1.55149986397486	7.40227483853869E-06	0.00010457315194289
ENSG00000130956	HABP4	2.02785025892059	0.0000074164960788023	0.000104688226770083
ENSG00000101084	C20orf24	1.56381378112568	7.51026279330822E-06	0.000105909027698482
ENSG00000141219	C17orf80	0.826795614394494	7.69545910177918E-06	0.000108198246420321
ENSG00000167088	SNRPD1	1.61277996078356	7.71265948208223E-06	0.000108375689622632
ENSG00000074695	LMAN1	1.13353859192666	0.0000077249837107573	0.00010845641824064
ENSG00000090861	AARS	1.095932703476	7.86197655448396E-06	0.000110187483567579
ENSG00000139289	PHLDA1	4.44084560271786	7.86488018195668E-06	0.000110187483567579
ENSG00000167702	KIFC2	1.11031216028942	0.0000079395456379182	0.000111101991975197
ENSG00000042286	AIFM2	1.34007380079412	8.25188591775784E-06	0.000114996688145998
ENSG00000117298	ECE1	1.25589428773768	8.28398152406289E-06	0.000115332423605469
ENSG00000083817	ZNF416	1.52089476030365	8.33875557791038E-06	0.00011600233582604
ENSG00000167685	ZNF444	1.09379407586489	8.42137600538982E-06	0.000116890862053742
ENSG00000185115	NSMCE3	1.39427295067635	8.42238599508216E-06	0.000116890862053742
ENSG00000043143	JADE2	1.03943561692559	8.64535154781825E-06	0.000119424958363119
ENSG00000141076	UTP4	1.14232121298956	8.65990736238439E-06	0.00011948652356624
ENSG00000067900	ROCK1	1.14569371412047	8.68630977115232E-06	0.000119701480668346
ENSG00000152454	ZNF256	1.32475451317473	8.73078654413275E-06	0.000120114303484775
ENSG00000183520	UTP11	1.19970480339468	0.0000089916275792354	0.000123559165741839
ENSG00000162972	C2orf47	0.905117076410286	9.24627947272487E-06	0.00012676402732508
ENSG00000099901	RANBP1	1.1162219503384	9.37252880398543E-06	0.000128346151093002
ENSG00000136936	XPA	1.07259574206756	9.57129977379692E-06	0.000130840939657629
ENSG00000182551	ADI1	1.03910545368823	9.79738417975576E-06	0.000133622767634329
ENSG00000185896	LAMP1	1.27878999963437	9.94383641889163E-06	0.00013523046044841
ENSG00000048991	R3HDM1	0.956765601372736	0.0000103272080204913	0.000140121974420232
ENSG00000156831	NSMCE2	1.04435202408484	0.0000104078724381251	0.000141135521778426
ENSG00000178980	SEPW1	0.761226665031443	0.0000104905395490635	0.000142093667629931
ENSG00000204084	INPP5B	1.1522114544329	0.0000105206983631736	0.00014238716641581
ENSG00000170802	FOXN2	1.09722713109795	0.0000105554984982251	0.000142565502833048
ENSG00000121281	ADCY7	3.61852170545272	0.0000106757310812426	0.000144107144652278
ENSG00000101160	CTSZ	1.78257020706787	0.000010764223728365	0.000145053431710878
ENSG00000117016	RIMS3	2.39020722786894	0.000010770802936702	0.000145059482009778
ENSG00000114520	SNX4	0.914840118514499	0.0000108042235292213	0.000145426815342414
ENSG00000168259	DNAJC7	0.929989245884446	0.0000108827054039688	0.000146316737485292
ENSG00000137161	CNPY3	1.05084900936199	0.0000109272478465934	0.000146832178190766
ENSG00000135093	USP30	0.956370725841922	0.0000110909490107223	0.000148778416349616
ENSG00000001036	FUCA2	1.0807058354457	0.0000111335357351378	0.000149180552718328
ENSG00000163719	MTMR14	0.70059822376006	0.0000111630378275822	0.000149491207761221
ENSG00000108433	GOSR2	0.784496141360753	0.0000111958730905612	0.000149806288366953
ENSG00000168906	MAT2A	1.50607789314012	0.0000111992276601082	0.000149806288366953
ENSG00000134318	ROCK2	1.12546232669568	0.0000112360740471718	0.000150214248688264
ENSG00000108788	MLX	0.992012257310104	0.0000112692778321572	0.000150573078115378
ENSG00000170385	SLC30A1	1.95601405387273	0.0000117736911935984	0.000156693394102429
ENSG00000071051	NCK2	1.20645205680289	0.0000119539988052736	0.000158735956076986
ENSG00000116212	LRRC42	0.972954369465073	0.0000119935810877996	0.000159083020897199
ENSG00000182481	KPNA2	1.54435192305705	0.0000120190266478911	0.000159331219926637
ENSG00000170456	DENND5B	1.47602296953804	0.0000121988214754402	0.000161443351551085
ENSG00000150093	ITGB1	1.16236118970224	0.0000123730924306554	0.000163384199880914
ENSG00000174307	PHLDA3	1.77448042480294	0.0000125103439053016	0.000165104443854518
ENSG00000155974	GRIP1	2.84783669508691	0.000012709909315961	0.00016764469573221
ENSG00000113068	PFDN1	0.697160507349626	0.0000130339437159656	0.000171536268159562
ENSG00000131043	AAR2	0.691689733824775	0.0000130838692408678	0.000172097608586245
ENSG00000111237	VPS29	1.12202257314666	0.0000131541601340393	0.000172926050695429
ENSG00000146700	SSC4D	1.60379678619228	0.0000132600428655085	0.000174124525153456
ENSG00000130856	ZNF236	0.972008918094506	0.0000133023904645737	0.000174583730206993
ENSG00000184216	IRAK1	1.74017157492238	0.0000133205450029553	0.000174725086698964
ENSG00000148384	INPP5E	1.19984947455955	0.0000136607207927394	0.000178803577027766
ENSG00000090661	CERS4	1.94117136183738	0.0000136964630266462	0.00017915942763932
ENSG00000112992	NNT	1.3330161978775	0.0000137838668472153	0.000180203116688207
ENSG00000111142	METAP2	1.06916549034375	0.0000142074788858637	0.000185229516736195
ENSG00000119203	CPSF3	0.916986833939456	0.0000144976565483429	0.000188597057121186
ENSG00000148143	ZNF462	3.70744860610534	0.0000147538562928166	0.000191613886639363
ENSG00000065518	NDUFB4	1.82440671436585	0.0000149313099889123	0.000193599774393223
ENSG00000159210	SNF8	0.914105699647525	0.0000152635957807633	0.000197475378327065
ENSG00000136485	DCAF7	0.746731524199863	0.0000153388756270212	0.000198232558144294
ENSG00000163812	ZDHHC3	1.04288516962673	0.0000157683035164697	0.000203006183955507
ENSG00000198925	ATG9A	0.954653785687196	0.000015812179650736	0.0002034603627381
ENSG00000177885	GRB2	0.774111127973956	0.0000161045895484451	0.000206997774299216
ENSG00000114125	RNF7	1.11048726301507	0.0000161942896188309	0.000208037717291203
ENSG00000141741	MIEN1	1.14230799468964	0.0000162237795457795	0.000208190507262354
ENSG00000166595	FAM96B	1.35176307696705	0.0000166728300867637	0.000213374352808594
ENSG00000089063	TMEM230	0.869740842889275	0.0000168679831534303	0.000215664865238853
ENSG00000141385	AFG3L2	1.17731613331579	0.0000169717455777136	0.000216730931249561
ENSG00000106829	TLE4	2.41747177434452	0.0000170374444087248	0.000217421339172082
ENSG00000005893	LAMP2	1.15788738277584	0.0000171315145706692	0.000218299961920164
ENSG00000163931	TKT	1.54859934722571	0.0000172823661827996	0.000219630843707619
ENSG00000008394	MGST1	1.59237517577085	0.0000175864586061175	0.000223135855226037
ENSG00000138867	GUCD1	0.924308527872453	0.0000178567070768273	0.000226322045826976
ENSG00000099246	RAB18	1.44625081975437	0.000017941620448216	0.000227159189928055
ENSG00000017260	ATP2C1	0.870594088708222	0.0000180544644849574	0.000228339280121618
ENSG00000174100		1.16614663832112	0.0000182841191445359	0.000230996856015565
ENSG00000065923	SLC9A7	0.924020020627654	0.0000183199721238123	0.000231326307559109
ENSG00000112079	STK38	1.12754091492273	0.0000183836554226502	0.000232006633741958
ENSG00000171135	JAGN1	0.975059940602404	0.0000187471947570214	0.000236013970626616
ENSG00000226887	ERVMER34-1	2.03379930510878	0.0000187408975319929	0.000236013970626616
ENSG00000197982	C1orf122	1.24454827811647	0.0000188579037505819	0.000237106576222114
ENSG00000116574	RHOU	3.27798800934935	0.000018871188785341	0.000237147605006652
ENSG00000116350	SRSF4	0.781298427754126	0.0000190605337055787	0.000239019294687392
ENSG00000111676	ATN1	0.897758836050973	0.0000195354803785157	0.000244327733719248
ENSG00000172296	SPTLC3	2.81696162485427	0.0000195953994339646	0.000244947668677181
ENSG00000185010	F8	1.70711853527064	0.0000198681665203775	0.000247833644898098
ENSG00000136448	NMT1	0.801667900870037	0.0000201828897331244	0.000251494323199011
ENSG00000177889	UBE2N	1.48278147319362	0.0000204317576045696	0.000254461410629964
ENSG00000139719	VPS33A	1.07101721236479	0.0000204892027957003	0.000255042612180251
ENSG00000100034	PPM1F	1.06450770814663	0.0000206705752564415	0.000257029859323791
ENSG00000069849	ATP1B3	2.13637022020255	0.0000208414092914405	0.000258882030479452
ENSG00000196182	STK40	1.24432001759377	0.000020955300042753	0.000260160159974641
ENSG00000075415	SLC25A3	0.944667548384576	0.0000211155447080437	0.00026173762934858
ENSG00000132793	LPIN3	1.11625763051545	0.0000211815752309931	0.000262281326368912
ENSG00000109111	SUPT6H	0.795890167144169	0.0000213751185018394	0.00026453945037083
ENSG00000169857	AVEN	1.38665144612991	0.0000216218434162645	0.000267313312831278
ENSG00000148219	ASTN2	2.3061190722271	0.0000219916744577099	0.000271601770716487
ENSG00000163902	RPN1	0.789008514978987	0.0000223233290890802	0.000275410290007772
ENSG00000137106	GRHPR	0.805655031791257	0.0000223605512291471	0.000275582147778806
ENSG00000104783	KCNN4	4.96670650926535	0.000022430716572626	0.000276302991284773
ENSG00000076555	ACACB	3.01648202409154	0.0000228681764776258	0.000281252422032255
ENSG00000185088	RPS27L	1.92742286986624	0.0000229843278459882	0.000282534103802399
ENSG00000233954	UQCRHL	2.14060142079992	0.0000231098809480622	0.000283488394439603
ENSG00000131148	EMC8	1.07279113060237	0.0000231898713115228	0.00028402791141023
ENSG00000166860	ZBTB39	1.30956612579982	0.0000231693497811017	0.00028402791141023
ENSG00000070759	TESK2	1.35073474010397	0.0000232324450521527	0.000284402145509099
ENSG00000175193	PARL	0.900470424489403	0.0000234987777178113	0.000287068444572312
ENSG00000127081	ZNF484	1.26116132418957	0.000024167872544895	0.000294633883580552
ENSG00000128524	ATP6V1F	1.15973953398755	0.0000244521798645637	0.000297793068520418
ENSG00000151148	UBE3B	0.837689678851812	0.000024476878384363	0.000297940521198139
ENSG00000177406	RP11-218M22.1	2.01367516972651	0.0000245669601209286	0.000298729690309113
ENSG00000006625	GGCT	1.11924734433972	0.0000246907787993103	0.000299927052735154
ENSG00000214160	ALG3	1.12703573166742	0.0000250600315225738	0.000303944400778402
ENSG00000162337	LRP5	1.18356821489896	0.0000250478639030394	0.000303944400778402
ENSG00000102225	CDK16	0.796928458943963	0.000025394599099152	0.000307529374863477
ENSG00000173272	MZT2A	1.48990035481048	0.0000257728543332337	0.000311790926425004
ENSG00000136819	C9orf78	0.695234139276729	0.0000259683411416587	0.000313968793348349
ENSG00000085872	CHERP	0.809395917003966	0.0000260312334892169	0.00031427401941599
ENSG00000183665	TRMT12	0.837222783170831	0.0000260662723077406	0.000314536563803195
ENSG00000148498	PARD3	1.20950412855763	0.0000265696857591527	0.000319795765065529
ENSG00000155463	OXA1L	0.69040412229907	0.0000267062236280499	0.000321112484609016
ENSG00000176105	YES1	1.36499111925079	0.0000270280894651457	0.000324487915278408
ENSG00000104325	DECR1	0.946324710104913	0.0000271754197745626	0.000325925979789901
ENSG00000163596	ICA1L	2.41318188081096	0.0000274993705767042	0.000329644177282954
ENSG00000163364	LINC01116	1.72042685446892	0.0000275497253198737	0.000330080582402112
ENSG00000108578	BLMH	1.22456878256993	0.0000276455893320551	0.000330971174640502
ENSG00000198399	ITSN2	0.723144399199048	0.0000277644857639209	0.00033214915400994
ENSG00000198218	QRICH1	0.586472552986326	0.0000278303761572737	0.000332417839867336
ENSG00000164754	RAD21	1.32475912889093	0.0000278325364338741	0.000332417839867336
ENSG00000153574	RPIA	0.897420723681041	0.0000278988620045094	0.000332747364724146
ENSG00000166912	MTMR10	0.853800950637465	0.0000285548892387555	0.00034006244945969
ENSG00000121775	TMEM39B	1.15565470558957	0.0000287875492679077	0.000342655824107898
ENSG00000170004	CHD3	0.727928956600732	0.0000292095645072074	0.000347125256488878
ENSG00000136870	ZNF189	1.07311277140964	0.0000292217179109092	0.000347125256488878
ENSG00000068120	COASY	1.1488474303026	0.0000293042445045377	0.000347930927100288
ENSG00000128965	CHAC1	2.8322960685715	0.0000294467614532198	0.000349097553240251
ENSG00000196498	NCOR2	0.906276802982212	0.0000295975425986189	0.000350709389339569
ENSG00000010278	CD9	1.34466643098395	0.0000298220947090519	0.000352840113550147
ENSG00000140718	FTO	0.932854340928967	0.0000300875250585592	0.000355447381657856
ENSG00000174928	C3orf33	1.60547295085183	0.0000304160105579887	0.000358751402772373
ENSG00000157036	EXOG	2.0223785239013	0.0000307645001961132	0.000361999188533379
ENSG00000075142	SRI	1.25488408105182	0.0000311263150662064	0.00036534821101768
ENSG00000168439	STIP1	0.914585108323045	0.0000314235749661507	0.000368471781181379
ENSG00000126016	AMOT	2.01663702357565	0.0000316424955703271	0.000370671471624085
ENSG00000119523	ALG2	0.872486406675697	0.0000318305029706131	0.000372689357641573
ENSG00000106803	SEC61B	1.3161252531535	0.0000322284794132283	0.000376789776855347
ENSG00000128872	TMOD2	2.82663375697032	0.0000322997504583326	0.000377436540787914
ENSG00000140332	TLE3	1.06235353595118	0.0000324285685926847	0.000378567942086185
ENSG00000131475	VPS25	1.0375110818963	0.0000324488115206276	0.00037861746894113
ENSG00000267259	CTD-2008P7.9	2.84589537513525	0.0000328278585830858	0.00038247445477674
ENSG00000168502	MTCL1	2.64845734136157	0.0000329154386451423	0.000383117572385638
ENSG00000180758	GPR157	2.18935979910376	0.00003305798248987	0.000384587531788492
ENSG00000185950	IRS2	3.45907341224265	0.0000333108444095624	0.000387148581170666
ENSG00000253738	OTUD6B-AS1	1.74393061557723	0.0000333568073706689	0.000387492455970613
ENSG00000111775	COX6A1	1.59091421503081	0.0000336418753436653	0.000390038067739907
ENSG00000160410	SHKBP1	1.2522655591344	0.0000338792062730237	0.000392383380818842
ENSG00000223380		0.582521829593477	0.000033911252084635	0.000392392155539716
ENSG00000184719	RNLS	1.37073749275749	0.0000341256869133646	0.000394294985073704
ENSG00000151693	ASAP2	1.21350379859377	0.0000345006882046237	0.000398238919505372
ENSG00000117395	EBNA1BP2	1.20400449513317	0.0000346079222709767	0.000399281942807471
ENSG00000137331	IER3	2.62342980061969	0.0000350612160618801	0.000404314598280833
ENSG00000087008	ACOX3	1.16082114303602	0.0000351008884039938	0.000404574925622848
ENSG00000131495	NDUFA2	1.41987578598447	0.0000356345602549252	0.000410326325699414
ENSG00000139354	GAS2L3	1.79948262972317	0.0000357690887967328	0.00041127499912395
ENSG00000156467	UQCRB	1.59336831805681	0.0000361174632604037	0.000414525489562659
ENSG00000091164	TXNL1	1.0816819498106	0.0000370254428872524	0.000423866983570902
ENSG00000142168	SOD1	1.10206159017021	0.000037173925574896	0.000424950048733702
ENSG00000119041	GTF3C3	0.785182497676134	0.0000376228953890159	0.000429874733747119
ENSG00000145979	TBC1D7	0.759076254648229	0.0000377721010071965	0.000431371248133827
ENSG00000174165	ZDHHC24	1.07317670870861	0.0000395124806581893	0.000449511456641698
ENSG00000010803	SCMH1	1.11351632870418	0.0000398288104049627	0.00045224047054349
ENSG00000135736	CCDC102A	1.58047514098832	0.000039992406357945	0.000453662661384493
ENSG00000116221	MRPL37	0.822931463199099	0.0000400546845403106	0.00045371661095135
ENSG00000115425	PECR	1.15426020331124	0.000040039611951734	0.00045371661095135
ENSG00000181894	ZNF329	1.27483169964079	0.0000400997433706352	0.000454009678171933
ENSG00000143036	SLC44A3	1.41637833975992	0.0000401800747142563	0.0004547016298247
ENSG00000131467	PSME3	1.15160537456017	0.0000402466622028179	0.00045523746066218
ENSG00000104408	EIF3E	1.14432574817862	0.0000403806482453863	0.000456316752354621
ENSG00000128626	MRPS12	1.00982486599081	0.0000407985049601788	0.000460423867974516
ENSG00000070081	NUCB2	1.20538567462973	0.0000408024701492862	0.000460423867974516
ENSG00000156345	CDK20	1.26569647343665	0.0000409540291358252	0.00046125425580249
ENSG00000177058	SLC38A9	1.32030699890059	0.0000409210813374878	0.00046125425580249
ENSG00000268549		2.3128031829956	0.00004122692152634	0.0004638861835843
ENSG00000063244	U2AF2	0.637328950888564	0.0000412672703349842	0.000464119495217077
ENSG00000126216	TUBGCP3	0.750708836416585	0.0000415674813319685	0.000467273781832955
ENSG00000269990		0.980076499964019	0.0000415981911206775	0.000467396959396292
ENSG00000111666	CHPT1	1.39076932877482	0.0000416954670429874	0.000468267601631804
ENSG00000054598	FOXC1	2.71564202001325	0.0000417229489326389	0.000468353956638062
ENSG00000187792	ZNF70	1.10421817137629	0.0000419626447050668	0.000470375206847937
ENSG00000114491	UMPS	0.801193916987806	0.0000426639513714924	0.000477557748961034
ENSG00000121316	PLBD1	2.04390916518058	0.0000426940576896651	0.000477668788231936
ENSG00000089159	PXN	0.771060395030694	0.0000434108573171869	0.000485000527241074
ENSG00000158055	GRHL3	3.04390041726754	0.0000441991839983397	0.000491949807597701
ENSG00000163636	PSMD6	0.938206023043614	0.0000443063727459878	0.000492911000605693
ENSG00000119655	NPC2	1.85585066760377	0.0000445248365884138	0.000494885171287922
ENSG00000151208	DLG5	0.809224029528468	0.0000445736310016749	0.000495185835865086
ENSG00000167272	POP5	1.0062527089033	0.0000449566901646616	0.000498738940162395
ENSG00000163932	PRKCD	1.09824542166366	0.0000449784126988166	0.000498746101074085
ENSG00000187815	ZFP69	1.15990429725691	0.0000453019943549726	0.000501628962293738
ENSG00000162441	LZIC	0.862586820431744	0.0000453316777550988	0.000501722867501825
ENSG00000119772	DNMT3A	0.917952754605294	0.0000461555430335698	0.000509411667352315
ENSG00000100292	HMOX1	2.79701298619629	0.0000463638632216504	0.000510995852544906
ENSG00000247595	SPTY2D1-AS1	1.5826459021013	0.0000467725376547606	0.000515020269206421
ENSG00000159388	BTG2	2.05301667524184	0.0000468335243218404	0.000515451946989633
ENSG00000103495	MAZ	1.12588776509492	0.000047137343077407	0.000518313638122994
ENSG00000116205	TCEANC2	0.978135843830321	0.0000481960492198847	0.00052774785409076
ENSG00000132824	SERINC3	1.10926339493391	0.0000485389875684499	0.000531257198349783
ENSG00000180834	MAP6D1	1.78509116096601	0.0000487934343288512	0.000533691299295854
ENSG00000076248	UNG	1.38232481145863	0.0000492941844456959	0.000538277935643056
ENSG00000185436	IFNLR1	1.30879256543766	0.0000494850129042512	0.000540112481712775
ENSG00000183508	FAM46C	1.53654597980691	0.0000505460077973096	0.000550423461807518
ENSG00000185122	HSF1	0.753419667450506	0.0000506636859615433	0.000551451150371664
ENSG00000140995	DEF8	1.00936351175576	0.0000507650562465986	0.000552300471707247
ENSG00000179195	ZNF664	0.815113865896328	0.0000509081892216881	0.000553603162478311
ENSG00000188735	TMEM120B	1.08569491924496	0.0000518729980707398	0.000562901043268208
ENSG00000136720	HS6ST1	1.45619089193566	0.0000535641888140616	0.00057982131743236
ENSG00000130311	DDA1	0.901539870239287	0.0000539150716841812	0.000583086079187742
ENSG00000184384	MAML2	3.90261957179076	0.0000542518980172853	0.000586192996704576
ENSG00000101182	PSMA7	0.923324527032926	0.0000543738955093545	0.0005872430348872
ENSG00000180879	SSR4	1.29731552011573	0.0000550438790868362	0.000593395585800367
ENSG00000198843	SELT	0.78274090710136	0.0000555308590376228	0.000597828351868639
ENSG00000272374	RP3-329A5.8	2.28109379489266	0.0000557790738198066	0.000599954647180947
ENSG00000168958	MFF	0.555219028526648	0.0000558545175156456	0.000600493161277929
ENSG00000166925	TSC22D4	1.04941603799746	0.0000564329117446691	0.000605885658173369
ENSG00000087510	TFAP2C	1.46381241214149	0.0000573869054857257	0.000615011931389822
ENSG00000134369	NAV1	2.51818320031407	0.0000577344175060596	0.000617896662797779
ENSG00000161905	ALOX15	1.63441628558907	0.0000595379025090538	0.000636047578813427
ENSG00000204560	DHX16	0.79015847263177	0.0000601870553116129	0.000642112844832595
ENSG00000176087	SLC35A4	0.81607357835452	0.0000602387842978539	0.000642375102676934
ENSG00000132819	RBM38	1.34205524481164	0.0000606798955168557	0.000646205385965507
ENSG00000254389	RHPN1-AS1	1.15183743990577	0.0000607437481149718	0.000646594382206288
ENSG00000088367	EPB41L1	1.34275984240618	0.0000615693732318626	0.000654793743274411
ENSG00000197885	NKIRAS1	1.02031913817725	0.0000619656829496632	0.000658121165008025
ENSG00000168653	NDUFS5	1.68082692578366	0.0000624377040771241	0.000662836873744723
ENSG00000214708	AC090616.2	1.9233845450807	0.0000625365549520485	0.000663588564946334
ENSG00000124789	NUP153	0.747106872675133	0.0000627572715335411	0.000665333923072663
ENSG00000269051		1.21793835942327	0.00006379372761111	0.000675414307141698
ENSG00000029993	HMGB3	1.43766016003787	0.0000643544456810567	0.000681046175380521
ENSG00000168802	CHTF8	0.756959599815322	0.0000644064613360325	0.000681291951092774
ENSG00000087253	LPCAT2	2.22615107752213	0.0000647035514181799	0.000684128747635564
ENSG00000162384	C1orf123	0.962407935905399	0.0000648641027994265	0.000685519993096395
ENSG00000214226	C17orf67	1.36618105316525	0.0000659724719067916	0.000696300893278505
ENSG00000165121	RP11-213G2.3	1.62709576253048	0.0000666827916386546	0.000703017131513634
ENSG00000134046	MBD2	0.903612403763172	0.0000674327750930288	0.000708553178075639
ENSG00000159792	PSKH1	0.914468089430317	0.0000676238674326218	0.0007102457057515
ENSG00000163659	TIPARP	1.93763926808993	0.0000679031816940688	0.000712862905247005
ENSG00000124214	STAU1	0.710304071103082	0.0000683719839896274	0.000717148163628791
ENSG00000101138	CSTF1	0.704503542067098	0.0000684694938818964	0.000717534824502796
ENSG00000134248	LAMTOR5	0.930319136986456	0.0000687947490144724	0.000719986796076718
ENSG00000187147	RNF220	0.952262209004725	0.0000688706250989704	0.000720462246559212
ENSG00000112294	ALDH5A1	1.08662237507318	0.0000693959466785781	0.00072499615287205
ENSG00000031003	FAM13B	1.13916824882842	0.0000704951662107367	0.000734857761253155
ENSG00000110092	CCND1	1.5100159839152	0.0000706122127417286	0.000735753760505294
ENSG00000179943	FIZ1	0.724785791034026	0.0000711999261524377	0.000741550991437119
ENSG00000177426	TGIF1	1.48337125966527	0.000071473779843601	0.000744075693989939
ENSG00000102901	CENPT	0.855524097275907	0.0000723813641854743	0.000751471436302129
ENSG00000108582	CPD	0.841607272324185	0.0000724547051505128	0.000751642125373338
ENSG00000204954	C12orf73	1.03076928730544	0.000073532768037651	0.00076215763910422
ENSG00000078142	PIK3C3	0.941467190530276	0.0000742386970080654	0.000767538514369931
ENSG00000235978	AC018816.3	2.15028077871442	0.0000742465308453185	0.000767538514369931
ENSG00000248333	CDK11B	0.834412907920581	0.000074442175340629	0.000769224976019783
ENSG00000170561	IRX2	4.30754291957842	0.0000746162830947053	0.000770679388214701
ENSG00000151576	QTRT2	0.72648504735323	0.0000746832903783398	0.000770706803411538
ENSG00000171603	CLSTN1	0.972635669026119	0.0000747267140699659	0.000770818759824587
ENSG00000189077	TMEM120A	0.974793464806501	0.0000750297464180173	0.000773607359254703
ENSG00000108264		0.920716769790051	0.0000754261954285752	0.000777029048983839
ENSG00000085063	CD59	1.45208544489052	0.0000764773266796691	0.000786818687487396
ENSG00000111785	RIC8B	1.29149235659135	0.0000769436950872468	0.000790929042940713
ENSG00000128487	SPECC1	1.89150629428249	0.0000770074529268342	0.000791240711510065
ENSG00000143198	MGST3	1.26509428426285	0.000077433552482968	0.000794928482604977
ENSG00000023909	GCLM	1.44635459214259	0.000077528396136837	0.000795556998172582
ENSG00000220785	MTMR9LP	2.47925949739991	0.0000776341879224907	0.000796297264330255
ENSG00000136932	TRMO	1.06128656661028	0.000077745366433581	0.000797092116948798
ENSG00000240849	TMEM189	0.934572299389477	0.000078718584348768	0.000806371368590864
ENSG00000196776	CD47	0.851669787246208	0.000079190694068362	0.000810856509623388
ENSG00000106635	BCL7B	0.870370997589281	0.0000803599564232149	0.000822117444376365
ENSG00000223825	DAZAP2P1	1.54550951294436	0.0000806358513468213	0.000823871394827217
ENSG00000115128	SF3B6	1.53773425207398	0.0000819666793875074	0.000833868243485205
ENSG00000159403	C1R	1.67638889054901	0.0000826280882717452	0.000838793845034023
ENSG00000165029	ABCA1	2.3789448796989	0.0000826060217804606	0.000838793845034023
ENSG00000164171	ITGA2	2.09914336833987	0.000082840108560985	0.000840585544116032
ENSG00000163513	TGFBR2	3.28386251752825	0.0000828762033605864	0.000840591341672335
ENSG00000172765	TMCC1	0.662744647959795	0.000083688483239572	0.000847739973843318
ENSG00000013306	SLC25A39	1.09081114837445	0.000083978569286988	0.000850314456584509
ENSG00000088356	PDRG1	0.902264817433311	0.0000840999266331868	0.000851029004959584
ENSG00000095380	NANS	1.32272433712548	0.000084297528679365	0.000852449752623852
ENSG00000054118	THRAP3	0.516323373315178	0.0000849938608708919	0.00085802462874911
ENSG00000164647	STEAP1	2.86003956110364	0.0000850613467767674	0.000858339722293666
ENSG00000163170	BOLA3	1.06726612098701	0.0000852183531803045	0.000859557498425211
ENSG00000186010	NDUFA13	1.45554372388117	0.000085836765581454	0.000865057659264883
ENSG00000123240	OPTN	1.68045807023222	0.0000862637783931803	0.000868990969824532
ENSG00000070413	DGCR2	0.87911342332335	0.0000864054421759525	0.000870047650301942
ENSG00000159479	MED8	0.786602234625454	0.0000875797391264038	0.000881122179824869
ENSG00000176641	RNF152	2.03452470289802	0.0000877286079718456	0.000882244815315675
ENSG00000120306	CYSTM1	1.63443233611463	0.000087816850087633	0.000882757061862217
ENSG00000110871	COQ5	0.964523483901043	0.0000889299676135549	0.000892808580245885
ENSG00000149926	FAM57B	1.39465550446942	0.0000892495737221611	0.000894878247028601
ENSG00000022567	SLC45A4	1.02643104627273	0.000089656446298163	0.00089857708121704
ENSG00000163528	CHCHD4	0.942602535518169	0.0000902523605359479	0.000903784006501115
ENSG00000179918	SEPHS2	0.994118581716233	0.0000905504736445618	0.000905814560996211
ENSG00000134265	NAPG	0.997410557369193	0.0000905699721640128	0.000905814560996211
ENSG00000166831	RBPMS2	2.06022652028304	0.0000905061562510679	0.000905814560996211
ENSG00000149531	FRG1BP	0.855601753516602	0.0000908168741337208	0.000907900165875046
ENSG00000144218	AFF3	3.09548153616037	0.000092926302676623	0.000928595903816271
ENSG00000174748	RPL15	1.2578323666347	0.0000938175255684761	0.000936710593893185
ENSG00000109790	KLHL5	1.49224452983232	0.000094335199229983	0.000941085084055265
ENSG00000198722	UNC13B	1.17117317829275	0.0000946483810168235	0.000943102810663064
ENSG00000138434	SSFA2	1.68982994533334	0.0000957199064843671	0.000952489548839183
ENSG00000101193	GID8	0.707955507506111	0.0000957874861850716	0.000952761364269588
ENSG00000101363	MANBAL	0.783999402164162	0.000096389663346782	0.000957945654672366
ENSG00000130699	TAF4	0.534419474971868	0.0000982075724585927	0.000974784306664295
ENSG00000137198	GMPR	2.66597697134295	0.0000983400745276897	0.000975690223710156
ENSG00000154945	ANKRD40	0.608908112471141	0.0000992759438143262	0.000983738131691122
ENSG00000154518	ATP5G3	0.926507212173447	0.0000998352588561193	0.000988866358439662
ENSG00000142784	WDTC1	0.897844267951044	0.000100582590989373	0.000995019168303312
ENSG00000105701	FKBP8	1.20495694701851	0.000100895002405332	0.000996443423170858
ENSG00000101773	RBBP8	1.78387096074905	0.000101531322568981	0.00100147381656932
ENSG00000225972	MTND1P23	3.04438020590849	0.000102033989338689	0.00100457530935145
ENSG00000104177	MYEF2	0.82866532081672	0.000103370613354132	0.00101622718063931
ENSG00000088930	XRN2	0.468186237924457	0.000104345126015857	0.00102495588082741
ENSG00000015475	BID	1.59136755358215	0.00010510750218044	0.0010311603748324
ENSG00000198908	BHLHB9	1.44935220661844	0.00010545092661989	0.00103410081914897
ENSG00000136715	SAP130	0.604639475533894	0.000106280238668913	0.00104093927467818
ENSG00000077152	UBE2T	1.81212162162913	0.000107046347362084	0.00104714250418726
ENSG00000184428	TOP1MT	0.811365336885176	0.000107242896794675	0.00104863168051752
ENSG00000111802	TDP2	0.893300077159351	0.000107533036997507	0.00105016684047545
ENSG00000185442	FAM174B	1.14981310068756	0.000107679858100916	0.00105116686561137
ENSG00000106785	TRIM14	1.46016441263665	0.000108973060419496	0.00106247611401176
ENSG00000125107	CNOT1	0.778574304818732	0.000109495081798289	0.00106668675199379
ENSG00000169217	CD2BP2	0.79766699599639	0.000109641511726107	0.00106767370040118
ENSG00000136783	NIPSNAP3A	1.1070515468344	0.000110523763539579	0.00107405495549777
ENSG00000153487	ING1	1.35953157469579	0.000110745273971962	0.00107576577093536
ENSG00000187123	LYPD6	1.83221856320283	0.000111645952270598	0.00108185019188336
ENSG00000101421	CHMP4B	0.8258457854226	0.000112498081864218	0.00108832465705355
ENSG00000213839	TMX2P1	1.31488217636799	0.000112786330372	0.00109066732145184
ENSG00000148337	CIZ1	0.840300390749293	0.000116742067817289	0.00112661808758586
ENSG00000182768	NGRN	0.923015655587175	0.00012062764599362	0.00115891676295048
ENSG00000120314	WDR55	0.996206493477414	0.000121048502926844	0.00116201652119997
ENSG00000185404	SP140L	1.6036298820526	0.000122518186447338	0.00117421945966114
ENSG00000161057	PSMC2	0.783221630550669	0.000122743443926201	0.00117552568824248
ENSG00000100056	DGCR14	0.697513880094123	0.000125947374860394	0.00120224746181292
ENSG00000164751	PEX2	1.11038692816406	0.000126568763021628	0.00120736514605883
ENSG00000013588	GPRC5A	2.18809629427134	0.000126588890984743	0.00120736514605883
ENSG00000079277	MKNK1	0.808077455850235	0.000127414587638645	0.00121475076039212
ENSG00000128829	EIF2AK4	0.757771157356653	0.000127931798036914	0.00121869973307065
ENSG00000100014	SPECC1L	1.09572839473218	0.000128261204610523	0.00122134603005989
ENSG00000133731	IMPA1	1.31762024907214	0.000131297505279603	0.00124925326394501
ENSG00000114988	LMAN2L	1.02806899991038	0.000132105775029281	0.00125492531293372
ENSG00000162402	USP24	0.492725145799184	0.000132278275563151	0.00125605972498028
ENSG00000185338	SOCS1	2.92890301940272	0.000132379412048949	0.00125651585532061
ENSG00000255112	CHMP1B	1.33104374119819	0.000132718526815102	0.00125922955093254
ENSG00000233622	CYP2T1P	2.27002552638408	0.000133296497332709	0.00126420641939234
ENSG00000203880	PCMTD2	0.797841979849373	0.000133489998535285	0.00126553438915884
ENSG00000124177	CHD6	0.697801108969744	0.000133585416145431	0.00126585488899424
ENSG00000141564	RPTOR	0.829471444581912	0.00013421134774353	0.00127084558689682
ENSG00000117385	P3H1	1.07702220573006	0.000134743153965063	0.0012748609565275
ENSG00000156931	VPS8	0.821036364136343	0.00013582712348412	0.00128306475968253
ENSG00000176386	CDC26	1.49948759128489	0.000135793676454777	0.00128306475968253
ENSG00000142892	PIGK	0.912237565963795	0.000136076226349928	0.00128439239893034
ENSG00000179348	GATA2	1.30400981089386	0.000136057126214438	0.00128439239893034
ENSG00000157895	C12orf43	0.755509432761085	0.000136701289557486	0.00128926369661171
ENSG00000142599	RERE	0.725799723000363	0.000138266833038934	0.00130258755132457
ENSG00000141449	GREB1L	2.49371022804386	0.000138279167008719	0.00130258755132457
ENSG00000146083	RNF44	1.02883068834335	0.00013851008979167	0.00130424363499415
ENSG00000187676	B3GLCT	1.59045113996573	0.000139232429478698	0.00131020153476796
ENSG00000121073	SLC35B1	0.907060260619207	0.000139988716758671	0.00131554924728373
ENSG00000147586	MRPS28	1.4094390877328	0.000140353091545038	0.00131740388942096
ENSG00000112308	C6orf62	0.842556744088085	0.000140688157553152	0.00132002532600327
ENSG00000022840	RNF10	0.708683554681797	0.00014089675449677	0.00132103701208667
ENSG00000261971	MMP25-AS1	1.13406156005528	0.000141143006699554	0.00132219594914154
ENSG00000244038	DDOST	0.860936042388258	0.000141239632166757	0.00132257752907083
ENSG00000107438	PDLIM1	2.29229444900374	0.00014134356017884	0.00132302716159489
ENSG00000133740	E2F5	1.0577567545353	0.0001425158843815	0.00133294599688515
ENSG00000131374	TBC1D5	0.914148992583201	0.00014316891757165	0.00133779590313783
ENSG00000100031	GGT1	1.64887723011845	0.000143340144300549	0.00133853900338748
ENSG00000134330	IAH1	1.0059637242676	0.000143934957674904	0.00134356327552712
ENSG00000188807	TMEM201	1.16236430264754	0.000144072954292935	0.00134432110308901
ENSG00000115221	ITGB6	2.29512526330354	0.000145727220852591	0.00135780453811454
ENSG00000182923	CEP63	1.0231060651892	0.000146920126208191	0.00136819006157592
ENSG00000196396	PTPN1	1.34905551803619	0.000147358422234457	0.00137096595934679
ENSG00000181638	ZFP41	0.968458783213592	0.000147588732917278	0.00137124116266705
ENSG00000169855	ROBO1	3.04184111383533	0.00014825022560451	0.00137516467600138
ENSG00000108306	FBXL20	0.907759855793515	0.000148756378015383	0.00137896850064733
ENSG00000133216	EPHB2	2.3128807105408	0.000149314181305238	0.00138340699773917
ENSG00000183283	DAZAP2	0.721272384217318	0.0001496301965705	0.00138579230585039
ENSG00000118276	B4GALT6	2.70275047744863	0.000150412774830453	0.00139249510595188
ENSG00000179023	KLHDC7A	2.67952319531725	0.000151045389378314	0.00139780486854088
ENSG00000173821	RNF213	1.26638872341674	0.000151887290926846	0.00140449744634699
ENSG00000166452	AKIP1	0.813392426348628	0.000152442269478538	0.00140907868073072
ENSG00000110851	PRDM4	0.834482631525168	0.000153067430401468	0.00141430480499411
ENSG00000108424	KPNB1	0.691829809213864	0.000153521113620399	0.00141794305683041
ENSG00000111737	RAB35	0.801024951182118	0.000155083230517782	0.00142958102210451
ENSG00000119231	SENP5	0.589055045978471	0.000156078837806831	0.00143708194351351
ENSG00000130038	CRACR2A	2.44698656461447	0.000156079135985705	0.00143708194351351
ENSG00000170275	CRTAP	1.01191720390255	0.000157225885080126	0.0014453908774868
ENSG00000101849	TBL1X	1.06391810847649	0.000159194003781196	0.00145894953968801
ENSG00000125510	OPRL1	1.87431917190842	0.000159527340105687	0.00146143842389503
ENSG00000241015	TPM3P9	0.920428981355233	0.000160211032642355	0.00146656621486114
ENSG00000089639	GMIP	0.926858806968953	0.000160196465385981	0.00146656621486114
ENSG00000005007	UPF1	0.55354487140024	0.000160491336698208	0.0014679963279048
ENSG00000111321	LTBR	1.16006197793239	0.000160891387712276	0.00147108690395502
ENSG00000087263	OGFOD1	0.727913980167499	0.000162027344372877	0.00147804666534132
ENSG00000124151	NCOA3	1.00781895800064	0.00016324595342027	0.00148801579190441
ENSG00000120533	ENY2	1.44827337551451	0.00016479754067714	0.00150100238839229
ENSG00000176125	UFSP1	1.74983981728422	0.000165526982067291	0.0015070661703187
ENSG00000267040	RP11-35G9.3	1.62876218969262	0.000166179443648992	0.00151242468271773
ENSG00000006831	ADIPOR2	1.08805166041211	0.000168079965119889	0.00152678549506024
ENSG00000115109	EPB41L5	0.782393012699457	0.000168180993402166	0.00152711697884706
ENSG00000169057	MECP2	0.699207589861298	0.000168661060592283	0.00153016326234258
ENSG00000134153	EMC7	0.745238050451763	0.000168678275416087	0.00153016326234258
ENSG00000151692	RNF144A	1.91727420244943	0.000168710474219321	0.00153016326234258
ENSG00000241468	ATP5J2	1.56179443469058	0.000169629427681607	0.00153790848552868
ENSG00000140931	CMTM3	1.22722811703503	0.00016982927890742	0.0015391306881602
ENSG00000151116	UEVLD	0.679926689237192	0.000170451305985565	0.00154358563089798
ENSG00000169047	IRS1	1.9554529175095	0.000171284039816021	0.00155053337190762
ENSG00000179950	PUF60	0.741444573406233	0.000171687985624918	0.00155359571848659
ENSG00000075785	RAB7A	0.947870818558546	0.000172729657391616	0.00156182723838663
ENSG00000172057	ORMDL3	1.00708319823826	0.000175171338155724	0.00158088458229554
ENSG00000164933	SLC25A32	0.960195436513114	0.000175795380875313	0.00158591158888774
ENSG00000148154	UGCG	1.4884098904444	0.000179002397418164	0.0016118979236541
ENSG00000213694	S1PR3	1.74641360056796	0.000179292094616023	0.00161376524720386
ENSG00000095203	EPB41L4B	2.26990630528034	0.000179741576429241	0.00161719578823009
ENSG00000179922	ZNF784	0.959164399003027	0.000182345293812577	0.00163564696265618
ENSG00000140848	CPNE2	1.85853420805961	0.000184619727960137	0.00165416759663791
ENSG00000125534	PPDPF	1.1492314341445	0.000184882080417689	0.00165589124486138
ENSG00000161513	FDXR	1.12414209744433	0.000186511398853534	0.00166985214947831
ENSG00000008130	NADK	0.895028607880081	0.000187080494085988	0.00167431381677637
ENSG00000126107	HECTD3	0.87438811332994	0.000187544290423576	0.00167719597289988
ENSG00000010256	UQCRC1	0.540425220691265	0.000188477203961713	0.00168490218260144
ENSG00000130066	SAT1	2.25231259753587	0.000190563454564249	0.00170162378315238
ENSG00000107897	ACBD5	0.982009433839245	0.000190904847545307	0.00170338665439842
ENSG00000162688	AGL	0.951137861205636	0.000191446938540551	0.00170629337351603
ENSG00000246695	RASSF8-AS1	1.88976692991597	0.000192427868517017	0.00171439030599329
ENSG00000132780	NASP	1.24290369213286	0.000193582674496688	0.00172302391797245
ENSG00000091129	NRCAM	4.65724751412107	0.000194151646021072	0.00172714676684084
ENSG00000155984		0.95712446555808	0.000194705021606356	0.00173141861190199
ENSG00000117691	NENF	1.12085578773129	0.00019587981149872	0.00173990389620653
ENSG00000171960	PPIH	0.953325858487092	0.000196336783696995	0.00174265465589722
ENSG00000111300	NAA25	0.908553015677202	0.000196526106257199	0.00174368100951035
ENSG00000151461	UPF2	0.953248582762575	0.000197220715986944	0.00174918808185871
ENSG00000186566	GPATCH8	0.686232646681676	0.000197389598838063	0.00174960612354441
ENSG00000108666	C17orf75	1.0366372500289	0.000198348988915959	0.00175590427411834
ENSG00000087086	FTL	2.17554629432487	0.00019897124833326	0.00176009594366727
ENSG00000102054	RBBP7	0.85523652153355	0.000199846448374532	0.00176651718636031
ENSG00000131370	SH3BP5	1.84531121153501	0.000199780938191918	0.00176651718636031
ENSG00000134684	YARS	0.906528712451153	0.000203485396215334	0.00179332399651525
ENSG00000164830	OXR1	0.850316270806301	0.000203974488412474	0.00179696512260029
ENSG00000101126	ADNP	0.650025778646852	0.000206320143810193	0.00181458516930818
ENSG00000180423	HARBI1	0.947576490643748	0.000206170884177968	0.00181458516930818
ENSG00000074696	HACD3	0.983242745952019	0.000206272509329972	0.00181458516930818
ENSG00000124562	SNRPC	0.756274287070789	0.0002071438398618	0.00182081897572429
ENSG00000162437	RAVER2	1.1048963444817	0.00020779173552002	0.00182583581047539
ENSG00000114626	ABTB1	1.22240408669217	0.000208068955442844	0.00182759305591834
ENSG00000166123	GPT2	1.47648810479839	0.000208444477042553	0.00183021211883411
ENSG00000066135	KDM4A	0.883748659465722	0.000208524959890078	0.00183023966093431
ENSG00000127948	POR	1.08492395212459	0.000208697692763937	0.00183039788875947
ENSG00000065882	TBC1D1	2.20136215690347	0.000209075924824931	0.00183303579441732
ENSG00000154743	TSEN2	0.84019354414836	0.000214620952775898	0.00187747711849763
ENSG00000108100	CCNY	0.961730548595563	0.00021631639284181	0.00189019253006155
ENSG00000100504	PYGL	2.504731266438	0.000216596014824974	0.001891258855647
ENSG00000135924	DNAJB2	0.703985704584039	0.000216748094307675	0.00189188865938861
ENSG00000123992	DNPEP	0.989789507966761	0.000217070927042014	0.00189400787116341
ENSG00000198690	FAN1	0.706065499673618	0.000219463817472439	0.0019127706493003
ENSG00000171793	CTPS1	1.75180372867749	0.000219668648481985	0.00191385096797836
ENSG00000147654	EBAG9	0.978892711867383	0.000220103701001065	0.0019169355453766
ENSG00000137801	THBS1	2.64591126315455	0.000221618901971344	0.0019280029696132
ENSG00000083290	ULK2	0.895552376090695	0.000222573371794336	0.00193488379749058
ENSG00000196821	C6orf106	0.591849103426089	0.000223479131751154	0.00194127551604771
ENSG00000105939	ZC3HAV1	1.091628141746	0.000223863423050715	0.00194324291256386
ENSG00000072195	SPEG	1.18315035523591	0.000227464748820702	0.00196944689035648
ENSG00000183475	ASB7	0.804776518336655	0.00022773061970216	0.00197102767154799
ENSG00000109519	GRPEL1	0.938852630961015	0.000232251144934089	0.00200721652395009
ENSG00000150995	ITPR1	1.70559533388019	0.000232683253700432	0.00201021680624802
ENSG00000182952	HMGN4	0.955542471800385	0.000233069622893033	0.00201214893264315
ENSG00000183495	EP400	0.52604226549893	0.000234513515018223	0.00202381229244209
ENSG00000113108	APBB3	0.888703040368291	0.000236683320647954	0.00203892922667836
ENSG00000273033	RP11-67L2.2	1.33620206283363	0.000239013297215035	0.00205739237977423
ENSG00000182149	IST1	0.683459206944715	0.000239390593718609	0.00205914199169882
ENSG00000119574	ZBTB45	0.758278597667266	0.000239583537323193	0.00205957866698163
ENSG00000108819	PPP1R9B	0.78515137002422	0.000239615436343677	0.00205957866698163
ENSG00000122705	CLTA	0.579705879802213	0.000241489286176993	0.00207493136485337
ENSG00000136193	SCRN1	0.909012477943006	0.00024249585806624	0.00208131283620654
ENSG00000262001	DLGAP1-AS2	2.59647750737388	0.00024274278034765	0.00208267672638377
ENSG00000114439	BBX	0.946151230359823	0.000248367528286581	0.00212477253139746
ENSG00000185608	MRPL40	0.828142365968464	0.000249266975112953	0.00213015689133182
ENSG00000064652	SNX24	1.2832184254183	0.000249206544624718	0.00213015689133182
ENSG00000111605	CPSF6	0.553995505561255	0.00025030216901056	0.00213668839296425
ENSG00000014164	ZC3H3	0.747445775514577	0.000250490437858613	0.00213752442518873
ENSG00000130312	MRPL34	0.945307693797098	0.000251764928728932	0.00214762563392672
ENSG00000058262	SEC61A1	0.756759994564978	0.000252368928215149	0.00215200214355138
ENSG00000165102	HGSNAT	0.656668006872808	0.000254270317148205	0.00216198293736183
ENSG00000104412	EMC2	1.10439699537354	0.000254457642252521	0.00216202197077968
ENSG00000118855	MFSD1	1.17160286431965	0.000255924863716533	0.0021729278974253
ENSG00000260285	RP11-600F24.7	1.69829140585149	0.000256487801576986	0.00217692641632576
ENSG00000107863	ARHGAP21	1.26413323380585	0.000260221886325422	0.00220387634077253
ENSG00000135972	MRPS9	0.613246642275596	0.000260988167207015	0.00220780547037176
ENSG00000134461	ANKRD16	0.904648305373383	0.000260996143133383	0.00220780547037176
ENSG00000103485	QPRT	1.26444258326074	0.000260884928543587	0.00220780547037176
ENSG00000163870	TPRA1	0.707440238787268	0.00026197639437519	0.00221398122146433
ENSG00000105656	ELL	0.760227870001401	0.00026449401806455	0.0022328654832185
ENSG00000185818	NAT8L	2.42980369723096	0.000264985840883791	0.00223542244307777
ENSG00000101347	SAMHD1	2.17202105574691	0.000266992730079035	0.00225074776339872
ENSG00000178718	RPP25	1.83982862863975	0.000267215300197953	0.00225181402957076
ENSG00000105677	TMEM147	0.933207701215465	0.000269356016731869	0.00226582702592471
ENSG00000125944	HNRNPR	0.587658400655228	0.000269926699859459	0.00226901438677598
ENSG00000136986	DERL1	0.752038325392713	0.000271428399281462	0.00228003158208875
ENSG00000119326	CTNNAL1	1.91849008846174	0.000271430037051262	0.00228003158208875
ENSG00000129282		1.32743635583388	0.000271602514423755	0.00228067079446746
ENSG00000236438	FAM157A	1.22879634205722	0.000273093433243908	0.00229237669771217
ENSG00000113282	CLINT1	0.539324219063201	0.000274577525825711	0.00230320028132357
ENSG00000187866	FAM122A	0.734987303605902	0.000277342830789079	0.00232228004421868
ENSG00000125166	GOT2	0.981456537388663	0.00028209837589616	0.00235626327879662
ENSG00000116793	PHTF1	0.936341666138329	0.000285388422667504	0.00238038288529473
ENSG00000213186	TRIM59	1.01900948324379	0.000287989955183043	0.00239954447517477
ENSG00000124702	KLHDC3	0.755569287185091	0.000289043771303721	0.00240663010568612
ENSG00000144645	OSBPL10	0.857038451894018	0.000291688117748898	0.0024236100127716
ENSG00000102898	NUTF2	0.796962737672176	0.00029469750466828	0.00244595827883742
ENSG00000173517	PEAK1	1.53214918959549	0.000295467281455067	0.00245148747583143
ENSG00000187109	NAP1L1	1.1505379816074	0.00029616567319856	0.00245632181421222
ENSG00000147041	SYTL5	3.18461219099597	0.000296257552202243	0.00245632181421222
ENSG00000120129	DUSP1	2.28219109794974	0.000296380757640323	0.00245648261577687
ENSG00000116497	S100PBP	0.810203698689815	0.000301360985751549	0.00249426547948195
ENSG00000164823	OSGIN2	1.03784763030266	0.000306246510098873	0.00253116003090103
ENSG00000138385	SSB	1.1104117092829	0.000308771850153305	0.00255114116277153
ENSG00000146701	MDH2	0.755942419675673	0.00031019510215739	0.00256111189893591
ENSG00000166016	ABTB2	1.85474498996715	0.000312672758688729	0.00257797055360676
ENSG00000084733	RAB10	0.76354588978162	0.000313795200822854	0.00258632387219478
ENSG00000149346	SLX4IP	0.877345984726232	0.000314659971229351	0.00259254836323124
ENSG00000177200	CHD9	0.861080240194699	0.000315065234786829	0.00259498386730273
ENSG00000131067	GGT7	1.42507669293474	0.000315701066597893	0.00259846040156084
ENSG00000104853	CLPTM1	0.63796909278631	0.000316300009057346	0.00260196586055465
ENSG00000159592	GPBP1L1	0.584863036162936	0.000319909857916425	0.00262939320845512
ENSG00000197321	SVIL	1.46197434096451	0.000324978281860782	0.00266269537298608
ENSG00000102081	FMR1	0.987664989443364	0.000326856977742713	0.00267534301775366
ENSG00000073614	KDM5A	0.575433058461158	0.00032800893953707	0.00268291584385264
ENSG00000178537	SLC25A20	1.36567534207452	0.000328460115367879	0.00268567785416383
ENSG00000120756	PLS1	1.33538550747482	0.000330877222801523	0.00270357310882336
ENSG00000242259	C22orf39	0.757718072254802	0.000331434849831824	0.00270719463292042
ENSG00000117643	MAN1C1	1.1835142530278	0.00033443101405624	0.0027297830581624
ENSG00000164347	GFM2	0.749969820398869	0.000335213587777844	0.00273522728537487
ENSG00000035499	DEPDC1B	1.78481222980558	0.000340133580131758	0.00276868968237282
ENSG00000127125	PPCS	0.640474315044246	0.000341448322303692	0.00277748080119363
ENSG00000135905	DOCK10	2.36305109578134	0.000342456046392291	0.00278472076487312
ENSG00000167491	GATAD2A	0.754679968807824	0.000344141856281701	0.00279696387234914
ENSG00000108344	PSMD3	0.863008387523751	0.000345789391036447	0.00280860613060728
ENSG00000101353	MROH8	1.67604259806866	0.000345868159767975	0.00280860613060728
ENSG00000213281	NRAS	0.792378131109523	0.000348863745930534	0.00282904825906587
ENSG00000162604	TM2D1	0.927673198928787	0.000351049611353648	0.00284579888779081
ENSG00000072840	EVC	1.40776818869154	0.000354414402426052	0.00287012594271309
ENSG00000174028	FAM3C2	2.29296976359978	0.000354887917043191	0.00287297734553303
ENSG00000170382	LRRN2	1.85329971558368	0.000355144209195744	0.00287406888584093
ENSG00000267414	RP11-456K23.1	1.79666339573477	0.000356017594940067	0.00287821772525054
ENSG00000163013	FBXO41	0.909220441756763	0.000357321885193243	0.00288774172449717
ENSG00000102900	NUP93	0.884570791713845	0.000359351207485601	0.00290116943798423
ENSG00000157734	SNX22	1.3442913458005	0.000361845239114397	0.0029183176186653
ENSG00000184277	TM2D3	0.583695395768731	0.000362292503366191	0.00291993443704161
ENSG00000135048	TMEM2	2.35647178137873	0.000363061484660776	0.00292414020133695
ENSG00000014216	CAPN1	0.861164655268648	0.000364518013399397	0.00293468599613926
ENSG00000151090	THRB	0.917562461657027	0.000364618891461329	0.00293468599613926
ENSG00000156709	AIFM1	0.99313810806892	0.000365591744123856	0.00294051578558899
ENSG00000166226	CCT2	1.09483111630286	0.000366237071964202	0.00294470534620758
ENSG00000084463	WBP11	0.751562337432841	0.000366865791135585	0.00294875856509557
ENSG00000150054	MPP7	0.826157424431588	0.000368100921744139	0.00295768153182736
ENSG00000164405	UQCRQ	1.52414652173318	0.000369383995424816	0.00296497065255679
ENSG00000185838	GNB1L	0.816892343431709	0.000377242797693424	0.00301883541488654
ENSG00000170745	KCNS3	1.83720819274364	0.000378276958984278	0.00302608778919709
ENSG00000139613	SMARCC2	0.558015507241078	0.000378952063877546	0.00303046390251246
ENSG00000101150	TPD52L2	0.746412931289107	0.000380352336551122	0.00303858114105645
ENSG00000236540	AC006547.13	1.44595813175543	0.000380984176430884	0.00304157509004184
ENSG00000135749	PCNX2	1.57035358319666	0.000381121331207052	0.00304164386521163
ENSG00000069509	FUNDC1	1.13227086664423	0.000382288017393507	0.00304992628306897
ENSG00000126749	EMG1	0.687590235328351	0.000383743496166242	0.00306050635314519
ENSG00000215012	C22orf29	0.800830925563448	0.00038442570535013	0.00306388193523076
ENSG00000206560	ANKRD28	0.654942851605683	0.000385511626152283	0.00307046839772517
ENSG00000078618	NRDC	0.54146663480421	0.000385787390447089	0.00307163089507048
ENSG00000108175	ZMIZ1	0.854645393511937	0.000386124767614281	0.00307328300573721
ENSG00000184060	ADAP2	1.90773212805139	0.000386512563213918	0.00307533516588129
ENSG00000164346	NSA2	1.06322464565093	0.000387477892228644	0.00308094400665538
ENSG00000043514	TRIT1	0.907838753751283	0.000388029164102095	0.00308325524182266
ENSG00000138061	CYP1B1	2.90333342757672	0.0003912441375586	0.00310775764587081
ENSG00000125870	SNRPB2	0.996209963982754	0.000398466080721524	0.00315453424828151
ENSG00000184867	ARMCX2	1.4353989672373	0.000398338598579686	0.00315453424828151
ENSG00000100225	FBXO7	0.498618684973874	0.000398606973212688	0.00315459424987687
ENSG00000204519	ZNF551	1.21951222688908	0.00039954064084566	0.00315986971401433
ENSG00000107937	GTPBP4	0.839885025575828	0.000400325806633576	0.00316502157112272
ENSG00000203497	PDCD4-AS1	1.91233136149167	0.00040204902888703	0.0031754626737496
ENSG00000174151	CYB561D1	0.910099867152559	0.000402927238586801	0.00318133708597914
ENSG00000005238	FAM214B	1.16149004988488	0.000408041530468038	0.00321635134425889
ENSG00000130520	LSM4	0.808010616467427	0.000410178263504665	0.00322889163317062
ENSG00000155366	RHOC	0.960343471805092	0.000413701638542135	0.00325148543336895
ENSG00000119986	AVPI1	1.20221608187223	0.000414440457585296	0.00325486377293092
ENSG00000215440	NPEPL1	0.849361670733385	0.000414787347882635	0.00325650730356563
ENSG00000232677	LINC00665	1.08462339507786	0.000416134252622194	0.00326491539118003
ENSG00000101596	SMCHD1	0.853101115997083	0.000420422969767706	0.00329637797667768
ENSG00000156639	ZFAND3	0.482305921239781	0.000420627132243621	0.00329669493355076
ENSG00000134709	HOOK1	1.18785597762451	0.000420742031835494	0.00329669493355076
ENSG00000127603	MACF1	1.17538801537852	0.000421580339199547	0.00330216999883445
ENSG00000137177	KIF13A	0.675970263102069	0.000425145025297373	0.00332898965374313
ENSG00000087258	GNAO1	2.27274169579023	0.000428064310685747	0.00334852422603532
ENSG00000131174	COX7B	1.11824427901854	0.000429652891342302	0.00335762099333979
ENSG00000104490	NCALD	1.94337702390445	0.000430640387409199	0.00336422696839349
ENSG00000153234	NR4A2	2.06091428814423	0.000432251936640376	0.00337458844497565
ENSG00000088387	DOCK9	0.72633013004715	0.000434370185974658	0.00338746259861802
ENSG00000198431	TXNRD1	1.18364222170578	0.000436172113218161	0.00339846582650028
ENSG00000106305	AIMP2	0.959314792022618	0.000441558607195099	0.00343478018476582
ENSG00000101337	TM9SF4	0.576733263912911	0.000443355129249028	0.00344648896958599
ENSG00000185973	TMLHE	0.834797244090965	0.000451672848255629	0.00350079744784571
ENSG00000116209	TMEM59	0.966026747590515	0.000453225365067365	0.00350847427811949
ENSG00000101474	APMAP	0.770848414678421	0.000455493026621917	0.00352002987882247
ENSG00000103489	XYLT1	2.06679959788084	0.000459424561542948	0.00354809510437036
ENSG00000082641	NFE2L1	0.904768587386793	0.000467737706861214	0.00360523692425307
ENSG00000145743	FBXL17	0.788796981904768	0.000469544714125306	0.00361680877940987
ENSG00000184924	PTRHD1	1.44008529661911	0.000473841891681577	0.00364753437959049
ENSG00000204220	PFDN6	1.44273732675354	0.000474592760419436	0.00364975251537378
ENSG00000008405	CRY1	1.10670946463027	0.000477613216489102	0.0036717873754976
ENSG00000204568	MRPS18B	0.956917198447325	0.000480229495617843	0.00368950342688475
ENSG00000112167	SAYSD1	0.865312658964988	0.000482128703314004	0.00370049027133288
ENSG00000173473	SMARCC1	0.455762255451439	0.000483436400228757	0.00370812173050667
ENSG00000159023	EPB41	1.04851910792746	0.000484466611361843	0.00371481964506004
ENSG00000094880	CDC23	0.59012048472601	0.000486979595724957	0.00372925507237529
ENSG00000160200	CBS	2.03021409475935	0.000487198746234444	0.00372972628021535
ENSG00000105063	PPP6R1	0.750487849597921	0.000491184701960677	0.00375538080856074
ENSG00000142687	KIAA0319L	0.77397296243515	0.00049436809291417	0.00377605945210717
ENSG00000110768	GTF2H1	0.539666710378994	0.000498250269686647	0.00380080468458902
ENSG00000175066	GK5	0.971667716463077	0.000499090034997234	0.00380598372482744
ENSG00000082781	ITGB5	1.08574874350707	0.000500385494271754	0.00381343335716017
ENSG00000155008	APOOL	0.912069462224896	0.000502374346629885	0.00382732909346522
ENSG00000224470	ATXN1L	0.704787564475831	0.000507108163248705	0.00385831087899198
ENSG00000130724	CHMP2A	0.740230336388469	0.00050700755595938	0.00385831087899198
ENSG00000112242	E2F3	0.917785840463458	0.000507080710656173	0.00385831087899198
ENSG00000180667	YOD1	1.72524188926564	0.000509376459216468	0.00386750912518563
ENSG00000142945	KIF2C	1.32760039043743	0.000510750731244551	0.003874926115242
ENSG00000215105	TTC3P1	1.94884555458064	0.000512489193753399	0.00388562377179964
ENSG00000198700	IPO9	0.699247994431012	0.000516513781259942	0.00391237695453073
ENSG00000116698	SMG7	0.660753720541359	0.000516928581812029	0.00391301376564876
ENSG00000127220	ABHD8	1.07627774940884	0.00051849182494798	0.00392108406958902
ENSG00000141579	ZNF750	1.55140712389903	0.00052037150647491	0.00393278535858058
ENSG00000228265	RALY-AS1	1.48282857023371	0.000522953912954347	0.00394977926659391
ENSG00000005194	CIAPIN1	0.880679125124483	0.000524350609857998	0.0039555797234158
ENSG00000165795	NDRG2	1.78557425454266	0.000524114534726168	0.0039555797234158
ENSG00000131238	PPT1	1.32844861544912	0.000525312887109148	0.00396099654820861
ENSG00000146476	ARMT1	1.15200477939459	0.000528552436446723	0.00397683189304891
ENSG00000163877	SNIP1	0.772265681443247	0.000529523878689394	0.00398081582152334
ENSG00000166965	RCCD1	0.912121938763385	0.000530666732118904	0.00398640218480305
ENSG00000140319	SRP14	1.0857097428314	0.000532248618991036	0.00399701652528876
ENSG00000162430	SEPN1	1.0754992887243	0.000534825208402397	0.00401298197956731
ENSG00000157600	TMEM164	1.36437705792177	0.000535578927589044	0.00401692683471935
ENSG00000229453	SPINK8	3.70653712559628	0.000536156761977172	0.0040199865204898
ENSG00000130590	SAMD10	0.839257914285083	0.000541156016858134	0.00404849030253368
ENSG00000124228	DDX27	0.749233071893209	0.000542293261213282	0.00405413692605854
ENSG00000106853	PTGR1	0.978407858194027	0.000544900899351008	0.0040713577459245
ENSG00000185090	MANEAL	1.39931190171851	0.000551814166984691	0.00411391891410169
ENSG00000196290	NIF3L1	0.620988817066642	0.000552263673587526	0.00411597332538634
ENSG00000182446	NPLOC4	0.62781483966202	0.000560044485588819	0.00416609011709784
ENSG00000183145	RIPPLY3	2.27091294621376	0.000560347380930357	0.0041670333359381
ENSG00000186806	VSIG10L	2.54220187413705	0.000561165670911729	0.00417180749946096
ENSG00000138119	MYOF	0.875047694193313	0.000562745869352384	0.004180449998154
ENSG00000084731	KIF3C	2.08999727630423	0.000566086760433476	0.00419389825051263
ENSG00000124181	PLCG1	0.838924828831393	0.000567306292721574	0.00420161777923963
ENSG00000174080	CTSF	1.1896139473828	0.000568397090576052	0.00420706298226497
ENSG00000114554	PLXNA1	0.791695156506858	0.000571475763038189	0.00422456450508362
ENSG00000130725	UBE2M	0.982724069278927	0.000572496440581136	0.0042307880304408
ENSG00000115170	ACVR1	0.78707479921077	0.00057769181382196	0.00426518608126959
ENSG00000078808	SDF4	0.808068764637691	0.000578239399091065	0.00426656654215525
ENSG00000148057	IDNK	1.11715686737062	0.000579173231252309	0.004272124741622
ENSG00000105290	APLP1	2.29149968914007	0.000591048169891795	0.00435293272460304
ENSG00000213465	ARL2	1.43971494002475	0.000591741931792695	0.00435668616428455
ENSG00000096092	TMEM14A	0.952021085265568	0.000592479607457728	0.00435845512922947
ENSG00000129158	SERGEF	1.4818008205332	0.00059253476527622	0.00435845512922947
ENSG00000168872	DDX19A	0.595730417189546	0.000594888770299362	0.00437305155998565
ENSG00000224877	C17orf89	1.2913937095042	0.000600018861661114	0.00440392255691282
ENSG00000089177	KIF16B	0.842110258277904	0.000601037700556945	0.00440866556363267
ENSG00000112855	HARS2	0.503850373134605	0.000604715857461047	0.00443152410501726
ENSG00000198373	WWP2	0.916093477890458	0.000605609633877675	0.0044366999276927
ENSG00000136827	TOR1A	0.653017746797261	0.000607789014410273	0.0044485343173493
ENSG00000164466	SFXN1	0.902788756713361	0.000621431364028215	0.00453436027351207
ENSG00000166348	USP54	1.12245611789872	0.000622705938328321	0.00454085997493468
ENSG00000197063	MAFG	1.05195897475434	0.000625320085645406	0.0045557109564739
ENSG00000151552	QDPR	1.97872844799566	0.000626425105677472	0.00456095300789108
ENSG00000203280	CTA-221G9.12	1.21076249618469	0.000627701253838992	0.00456743381598772
ENSG00000000419	DPM1	0.97356565609426	0.000631275123302032	0.00459202681915032
ENSG00000242779	ZNF702P	1.68659037729199	0.000634614444544151	0.00461489907844138
ENSG00000113558	SKP1	0.954621505349012	0.000640343063915171	0.0046522683209778
ENSG00000135250	SRPK2	0.647469671239435	0.000640590522720913	0.00465263767315683
ENSG00000082805	ERC1	0.775506557070176	0.00064143064089826	0.00465588136674096
ENSG00000158169	FANCC	1.09410241235984	0.000642604213682432	0.00466296949045304
ENSG00000221983	UBA52	1.13350573145473	0.000645406569318631	0.00467613461414169
ENSG00000272198		2.26595108868371	0.000649464950367062	0.00469834580267068
ENSG00000197858	GPAA1	0.960281543194546	0.000651282699840591	0.00471005578433004
ENSG00000204946	ZNF783	0.93937988770204	0.000653799036447769	0.00472536548548062
ENSG00000162377	COA7	1.08041396544692	0.000657045192679556	0.00474592808131146
ENSG00000163466	ARPC2	0.77469711636922	0.000664026509285415	0.00478904580591916
ENSG00000119042	SATB2	2.23796786724237	0.000665127689198377	0.00479552605408324
ENSG00000171606	ZNF274	0.75058522348139	0.000667127688969988	0.00480848081148243
ENSG00000151304	SRFBP1	0.910596282113018	0.000668201062999814	0.00481457781477416
ENSG00000164904	ALDH7A1	1.48444541352168	0.000668380514792423	0.00481457781477416
ENSG00000101558	VAPA	0.960072554082517	0.000668920988402433	0.00481700467089677
ENSG00000109618	SEPSECS	1.03004432784612	0.000669700028454433	0.00481968119626437
ENSG00000151012	SLC7A11	2.64362308689683	0.000681032376472953	0.00489676971269508
ENSG00000178974	FBXO34	0.849332706150973	0.00068480535607177	0.00492090772569885
ENSG00000158526	TSR2	0.67852195172427	0.000686924183214412	0.00493014466102597
ENSG00000177868	SVBP	1.41316264282698	0.000690209778012078	0.00495072263628366
ENSG00000115129	TP53I3	1.93943378889299	0.000695242925032656	0.00497927764377958
ENSG00000132313	MRPL35	0.640147114803401	0.000698992358400031	0.00500400852495704
ENSG00000129636	ITFG1	0.956626703116035	0.000699622915826218	0.00500458798585121
ENSG00000141682	PMAIP1	2.55697341260844	0.000703937356430516	0.00503088784814717
ENSG00000198841	KTI12	0.930628130090207	0.000708773429504561	0.00505933805802909
ENSG00000173950	XXYLT1	1.24858382303471	0.000711169876942407	0.00507234788992152
ENSG00000064601	CTSA	1.20258860184453	0.000719687242596951	0.00512950578963001
ENSG00000135049	AGTPBP1	1.60191141559872	0.000720405339004595	0.0051330778491014
ENSG00000116161	CACYBP	0.716781464040379	0.000723008980172832	0.00514543202942247
ENSG00000091157	WDR7	0.867228908868822	0.000724758371699081	0.00515323237665725
ENSG00000246705	H2AFJ	1.29568680300671	0.00072752604805086	0.00517135742716356
ENSG00000180574	EIF2S3L	1.70718928401508	0.000729435370940383	0.00518026085911233
ENSG00000087586	AURKA	1.31508025199424	0.000733819637904336	0.00520827057340441
ENSG00000243317	C7orf73	0.997246720511123	0.000735101875630549	0.0052153581724506
ENSG00000114209	PDCD10	1.11103078380457	0.000737503254949129	0.00522657667620882
ENSG00000114251	WNT5A	2.62752381111149	0.000742031026848244	0.00525551636884465
ENSG00000167220	HDHD2	0.66001859558676	0.000749960510100459	0.00530215582626447
ENSG00000230873	STMND1	1.97076168631769	0.000750650413756759	0.00530544824991822
ENSG00000173064	HECTD4	0.779996031773959	0.000758326423575444	0.00535170836894295
ENSG00000112578	BYSL	1.00353006955753	0.000759495341925636	0.00535835965294762
ENSG00000104140	RHOV	2.07348042259853	0.000760817502712635	0.00536289084500717
ENSG00000196227	FAM217B	0.818412097465074	0.000766035043701339	0.00539619035774744
ENSG00000144566	RAB5A	0.702265605517682	0.0007672731635834	0.00540035243006365
ENSG00000159314	ARHGAP27	0.977815308821945	0.000774116862459972	0.00544528160415883
ENSG00000152465	NMT2	1.132088783313	0.000777756517687561	0.00546438612768431
ENSG00000164258	NDUFS4	0.846441910629932	0.000778634934478109	0.00546893394317468
ENSG00000124006	OBSL1	1.29077358910429	0.00078142580253902	0.00548527996602813
ENSG00000099917	MED15	0.449241035404067	0.000782504632087846	0.00549122393508147
ENSG00000126217	MCF2L	1.07134981344658	0.000783070699010246	0.00549356713628208
ENSG00000163875	MEAF6	0.844557660418172	0.000791242984621209	0.00554268287302891
ENSG00000162413	KLHL21	1.41293656115064	0.000793311374387647	0.00555552739039209
ENSG00000105519	CAPS	1.54585320755245	0.000794703993137997	0.00556363331053977
ENSG00000114767	RRP9	1.15163960017376	0.000795464408763129	0.00556730976177519
ENSG00000007923	DNAJC11	0.849866455247215	0.000796973170752802	0.00557622002942743
ENSG00000120656	TAF12	0.715313613205246	0.000800342587880629	0.00559483209956258
ENSG00000172534	HCFC1	0.721382991369954	0.000823377610409323	0.00573721566405059
ENSG00000064393	HIPK2	1.28594341685522	0.000824395167264754	0.0057426149081501
ENSG00000138073	PREB	0.874435453486029	0.00082525700640591	0.00574692658698736
ENSG00000131171	SH3BGRL	1.99143322911811	0.000825920911374688	0.00574985775988798
ENSG00000070785	EIF2B3	0.713527222866259	0.000826184835871221	0.00575000346212374
ENSG00000143179	UCK2	0.938738942741385	0.000830332929850911	0.00577547563758439
ENSG00000005075	POLR2J	1.3122621753989	0.000831541569690472	0.00578048418436711
ENSG00000110888	CAPRIN2	0.719619151761632	0.00083329998439695	0.00579003075452785
ENSG00000068796	KIF2A	0.833937796507916	0.000835915818348438	0.00580273203615704
ENSG00000072756	TRNT1	0.84728010162945	0.000835968115254167	0.00580273203615704
ENSG00000153317	ASAP1	0.918049221546621	0.000837534969132507	0.00581190321835264
ENSG00000124249	KCNK15	2.10717828229613	0.00084281161665334	0.00584337863605859
ENSG00000141298	SSH2	0.585827900071777	0.000847171094310583	0.00586672800839079
ENSG00000186073	C15orf41	1.40992963661867	0.000850365245917612	0.00588540298746664
ENSG00000135124	P2RX4	0.924325797032554	0.00085532104169896	0.00591624139424802
ENSG00000171121	KCNMB3	1.28296767138516	0.000857091467432152	0.00592675493683431
ENSG00000163161	ERCC3	0.481442307356079	0.000857846958402831	0.00592851418711629
ENSG00000131778	CHD1L	0.743443166786147	0.000857770350560097	0.00592851418711629
ENSG00000104375	STK3	0.856110452519679	0.000858574721734875	0.0059300798716907
ENSG00000137075	RNF38	0.937845959041822	0.000860203047235791	0.00593612852340056
ENSG00000105612	DNASE2	0.833943396144287	0.000863762580882818	0.00595721770662493
ENSG00000157869	RAB28	0.609023916110162	0.000870009935390666	0.00599680894295058
ENSG00000076382	SPAG5	1.13889510919182	0.000872430714118623	0.00601174373564036
ENSG00000173801	JUP	0.658153264699536	0.00087347892755754	0.00601546328952097
ENSG00000074657	ZNF532	1.36341808810597	0.000878464967757202	0.00604157479400961
ENSG00000115306	SPTBN1	0.67899967293261	0.000884633045146348	0.0060728377566864
ENSG00000173402	DAG1	0.817073950091842	0.000884590799953669	0.0060728377566864
ENSG00000168234	TTC39C	1.04460916212421	0.000885034948814072	0.00607383468497314
ENSG00000162396	PARS2	1.29349346756111	0.00088828463871607	0.00608907282906674
ENSG00000170921	TANC2	0.772464542117519	0.000888944204354289	0.00609182933901985
ENSG00000189339	SLC35E2B	0.799788354549426	0.000890509141550556	0.00609902107569054
ENSG00000130449	ZSWIM6	1.19616760331155	0.000891139702823829	0.00610157372335656
ENSG00000047849	MAP4	0.786465680877997	0.000895170497036079	0.00612385645312655
ENSG00000067113	PLPP1	1.23595318407717	0.000895436474049846	0.00612390557382702
ENSG00000174405	LIG4	1.02191140191747	0.000897506370111245	0.00613628813520439
ENSG00000148300	REXO4	0.703212141037839	0.000899256142639612	0.00614292670418047
ENSG00000112787	FBRSL1	0.771009659856576	0.000905168844056481	0.00617796664462316
ENSG00000188738	FSIP2	2.27047357211348	0.000905075053404202	0.00617796664462316
ENSG00000115271	GCA	1.09509041601731	0.000910708984820398	0.00620504080270806
ENSG00000147889	CDKN2A	3.31776932627931	0.000911597208207252	0.00620930476045141
ENSG00000182810	DDX28	1.01216353710615	0.000914609776021248	0.00622624025603877
ENSG00000182500		1.23306047048677	0.000920039432173578	0.00625600375963315
ENSG00000124207	CSE1L	0.834155627424315	0.000925726995627209	0.00628925578453248
ENSG00000159199	ATP5G1	1.09030939617512	0.000928596503734763	0.00630298825419825
ENSG00000198912	C1orf174	0.622096865646582	0.00092964030599964	0.00630678857823093
ENSG00000010017	RANBP9	0.664960573107735	0.000933831893723126	0.00632796795566161
ENSG00000122140	MRPS2	0.778788680186389	0.000940599184384498	0.0063665327517421
ENSG00000133706	LARS	0.677996957454912	0.000948622540966999	0.00641533443466765
ENSG00000008513	ST3GAL1	1.23748579643906	0.000950166508761653	0.00642210514048186
ENSG00000108828	VAT1	1.42013586752896	0.000952551957568517	0.00642721327971024
ENSG00000176788	BASP1	2.77487562495609	0.000958657631588394	0.006462881919167
ENSG00000204634	TBC1D8	0.985621624852983	0.000965096654629625	0.00650073502376909
ENSG00000189143	CLDN4	1.23917128106523	0.000966716329224322	0.006509791832224
ENSG00000101439	CST3	1.42077388343105	0.000972010073930536	0.00653968642846302
ENSG00000138759	FRAS1	2.51059032067008	0.00097149247314151	0.00653968642846302
ENSG00000086061	DNAJA1	1.14337735042262	0.000978645862780448	0.00657328897274304
ENSG00000111679	PTPN6	0.766000448525962	0.000980921755684607	0.00658483730631627
ENSG00000101928	MOSPD1	1.01027830673232	0.000982429423117941	0.00659026764416197
ENSG00000121966	CXCR4	2.5818649683782	0.000982566210903243	0.00659026764416197
ENSG00000169783	LINGO1	2.93747680339865	0.000983860281367613	0.00659707731312038
ENSG00000179761	PIPOX	1.74604959329151	0.000987662722519125	0.00661882271395357
ENSG00000140943	MBTPS1	0.764310788662369	0.00099572036722501	0.00666904360306974
ENSG00000070010	UFD1L	0.711885431996887	0.000998619239968589	0.00668467526884773
ENSG00000131389	SLC6A6	1.92440777764116	0.00100559732163555	0.00672377774000054
ENSG00000168528	SERINC2	0.932368417591731	0.0010326970880094	0.0068797047279185
ENSG00000108294		0.970057448459942	0.00103873490627838	0.00691722621446429
ENSG00000167536	DHRS13	1.29477859590234	0.00104028929845045	0.00692294151144192
ENSG00000126351	THRA	1.35248661927222	0.00104060751079592	0.00692294151144192
ENSG00000175792	RUVBL1	0.98915234640511	0.00104303309367844	0.00693684432144829
ENSG00000088038	CNOT3	0.489144001457942	0.00105038743644144	0.00697987023547145
ENSG00000137409	MTCH1	0.539224478345916	0.00105032597670302	0.00697987023547145
ENSG00000141458	NPC1	1.00411824945976	0.00105118523293861	0.00698321060275867
ENSG00000251136	RP11-37B2.1	0.875765193030796	0.00105310573151266	0.00699400531147464
ENSG00000165675	ENOX2	0.872068800966656	0.00105980396195255	0.00703651547465858
ENSG00000104472	CHRAC1	1.05468093782815	0.00106592059076621	0.00707315730210346
ENSG00000174437	ATP2A2	0.913566132466664	0.00107628375043265	0.00713392223711143
ENSG00000104517	UBR5	0.56697717187619	0.00107793799049331	0.00714088652548804
ENSG00000186230	ZNF749	0.616515033462594	0.00107991956486896	0.00714409778838017
ENSG00000132749	TESMIN	0.803040552328871	0.00108009442357293	0.00714409778838017
ENSG00000055163	CYFIP2	2.58961328928493	0.00107955249380022	0.00714409778838017
ENSG00000064313	TAF2	0.719091835232125	0.00108741142995336	0.00718553942110764
ENSG00000163026	WDCP	1.12704226192109	0.00108893999066355	0.00719363121135446
ENSG00000072954	TMEM38A	1.33616494234891	0.00109103178635087	0.00720543822506858
ENSG00000022277	RTFDC1	0.656968775441486	0.00109574003922978	0.00722846293512523
ENSG00000253846	PCDHGA10	1.80430066661324	0.00109885490682257	0.007243742100433
ENSG00000130935	NOL11	0.675394287566962	0.00110004865022242	0.00724842902090902
ENSG00000089127	OAS1	2.19206561459767	0.00110029823112476	0.00724842902090902
ENSG00000136153	LMO7	1.52938249457077	0.00110269445358553	0.00726203988503756
ENSG00000183444	OR7E38P	1.27300716669584	0.00111376375657485	0.00732693682842111
ENSG00000198933	TBKBP1	1.58795962069371	0.00112907762529935	0.00742148995762735
ENSG00000135540	NHSL1	0.990034416255011	0.00113793612470401	0.00746520169638785
ENSG00000156261	CCT8	0.523828808048919	0.00114461643972644	0.00750278637486061
ENSG00000089693	MLF2	0.768929941031107	0.00114518021058481	0.00750440302494281
ENSG00000106789	CORO2A	1.29693420906355	0.00116726625176827	0.00764066979684439
ENSG00000107242	PIP5K1B	2.19751445882266	0.00117164335153117	0.00766212391328458
ENSG00000171475	WIPF2	0.76690689644496	0.00117730033493021	0.00768933420520388
ENSG00000132581	SDF2	0.580941029737077	0.00118511400809195	0.00773183147876474
ENSG00000006042	TMEM98	1.90231710177388	0.00118647865587381	0.00773860100163779
ENSG00000178741	COX5A	0.845219137376066	0.00118741338752647	0.00774256351309969
ENSG00000066697	MSANTD3	0.979043013617235	0.00118881101724061	0.0077452739815431
ENSG00000186493	C5orf38	3.33052217937257	0.00118861244855946	0.0077452739815431
ENSG00000160828		0.945547011546507	0.00119449726266825	0.00777803762424845
ENSG00000151746	BICD1	1.36375645696329	0.00119511030210934	0.00777988860490051
ENSG00000204959	ARHGEF34P	1.01512123739116	0.00119934028532862	0.00780527754998106
ENSG00000169180	XPO6	0.727845078107829	0.001201397409235	0.00781436693093122
ENSG00000052126	PLEKHA5	0.492317819974276	0.00120198363467304	0.0078160315326376
ENSG00000101276	SLC52A3	0.925402201213673	0.00120315287354519	0.0078214852875549
ENSG00000225190	PLEKHM1	0.9468599956136	0.00120470636897385	0.00782728358292922
ENSG00000020256	ZFP64	0.629936912289699	0.00120757929070596	0.00783979727972519
ENSG00000179051	RCC2	0.671169146278033	0.00121330960079139	0.0078702152093001
ENSG00000102580	DNAJC3	0.87772865427669	0.00121441969876342	0.00787525714766751
ENSG00000164985	PSIP1	0.973897904785119	0.00121484499833051	0.007875856765889
ENSG00000086189	DIMT1	0.805438651860172	0.0012167862060403	0.0078840930358533
ENSG00000168040	FADD	0.931791356563565	0.00121768959551181	0.00788565651302571
ENSG00000215256	DHRS4-AS1	1.15310625712743	0.00123380832300767	0.00797476272803345
ENSG00000273472	RP11-102N12.3	1.37531492029842	0.00123360949362525	0.00797476272803345
ENSG00000166225	FRS2	1.63398965515682	0.00123429639728014	0.0079757388445767
ENSG00000101181	MTG2	0.567199624515056	0.00125318371085084	0.00808233473694832
ENSG00000162999	DUSP19	1.92891587587154	0.00125285073390176	0.00808233473694832
ENSG00000197296	FITM2	0.855078622790576	0.00127004658476057	0.00817549301827785
ENSG00000088899	LZTS3	1.19425820733893	0.00127990958083559	0.00822779147278252
ENSG00000095539	SEMA4G	1.14507510163412	0.00128080007534874	0.00822904485011603
ENSG00000172954	LCLAT1	0.723695147686097	0.00128485118715154	0.00824020150582093
ENSG00000130304	SLC27A1	0.836179972942204	0.00128469402871884	0.00824020150582093
ENSG00000183723	CMTM4	0.93105763370934	0.00128497416035495	0.00824020150582093
ENSG00000058804	NDC1	0.91887491730623	0.00128767920821453	0.00825531105499336
ENSG00000204237	OXLD1	1.07424889278578	0.00128843695765734	0.00825793167092241
ENSG00000168938	PPIC	0.875114257623837	0.00128911875331273	0.00825960653699251
ENSG00000163933	RFT1	0.840799840565862	0.00129290682212565	0.00827089865692326
ENSG00000217555	CKLF	0.972413061723841	0.00131761562188022	0.00841304329750448
ENSG00000136718	IMP4	0.626734504806539	0.00134427614585345	0.00855787098179449
ENSG00000221995	TIAF1	1.24560857535083	0.00134417242769827	0.00855787098179449
ENSG00000150672	DLG2	1.56951128098477	0.0013440053618622	0.00855787098179449
ENSG00000164902	PHAX	0.586187203755848	0.00135872070601278	0.00863356822405487
ENSG00000100023	PPIL2	0.509795538440221	0.00135970794680381	0.00863752191817945
ENSG00000111639	MRPL51	0.947668631352738	0.00136198916910254	0.00864969127978354
ENSG00000169641	LUZP1	0.569264394703711	0.00136350107537854	0.00865696966640259
ENSG00000151883	PARP8	1.60754801278125	0.00136708657909814	0.00867507903491536
ENSG00000162408	NOL9	0.698369444659438	0.00136856550968093	0.00867980853808088
ENSG00000261220	RP11-629O1.2	2.3114865192796	0.00137508677493357	0.0087141613163506
ENSG00000213699	SLC35F6	1.0656088827077	0.00137678520758087	0.00871558811315839
ENSG00000213047	DENND1B	2.82727693698998	0.00139591489420091	0.00881781477348537
ENSG00000136463	TACO1	0.707906181353919	0.00139783227701003	0.00882757010165156
ENSG00000093167	LRRFIP2	0.698973762149877	0.00139955547489794	0.00882902724673685
ENSG00000074590	NUAK1	1.25192068236562	0.00141096697522225	0.00889799785338789
ENSG00000185798	WDR53	0.946002950747439	0.00141496285401174	0.00891196859581575
ENSG00000153179	RASSF3	0.820080419110847	0.00141546350460119	0.0089127495767371
ENSG00000170633	RNF34	0.545161891625687	0.00142226507652829	0.00894484921317893
ENSG00000105671	DDX49	0.688241215222532	0.00142723997387772	0.00896543124551861
ENSG00000152990	ADGRA3	1.05158149863921	0.00143937383603623	0.00901532638489288
ENSG00000128045	RASL11B	2.29713349253007	0.00143925013893983	0.00901532638489288
ENSG00000164949	GEM	2.34519216617144	0.00144751125905211	0.00905670516207035
ENSG00000110435	PDHX	0.464207696409446	0.00148527464130907	0.0092733651285743
ENSG00000272779	LL22NC03-80A10.6	1.43377802726849	0.00148515341489034	0.0092733651285743
ENSG00000038274	MAT2B	0.963919919796797	0.00149375933023413	0.0093165068611835
ENSG00000136379	ABHD17C	1.19804975108473	0.00149983482789675	0.00934947089897808
ENSG00000188483	IER5L	2.14905545180758	0.00150056825080342	0.00935157927805147
ENSG00000131871	VIMP	0.866837962289851	0.00150188046111124	0.00935729261486977
ENSG00000169955	ZNF747	0.661499071449768	0.00150442397377026	0.00936820644508572
ENSG00000125868	DSTN	1.08489737164296	0.0015120780774971	0.00940844163760554
ENSG00000168242		1.81483948482884	0.0015251692029903	0.00947439398354558
ENSG00000102189	EEA1	1.13461940919113	0.00152812768019711	0.00948834565639052
ENSG00000178691	SUZ12	0.654267423864311	0.00153276727665951	0.00950717485389097
ENSG00000034713	GABARAPL2	0.831200918080705	0.00153255364052473	0.00950717485389097
ENSG00000196756	SNHG17	0.882680073367499	0.00153196448042721	0.00950717485389097
ENSG00000072501	SMC1A	0.546065345050784	0.00153742220799307	0.00952855466415402
ENSG00000204160	ZDHHC18	0.685335323316195	0.00154043171654193	0.00954424889455916
ENSG00000247626	MARS2	1.11001409577916	0.0015411911856363	0.00954441429618211
ENSG00000171552	BCL2L1	0.735036942760827	0.00154546467882618	0.00956837537809104
ENSG00000172831	CES2	0.621247115700227	0.0015463806895371	0.00957154231140895
ENSG00000076513	ANKRD13A	0.718923068332575	0.00155021724982955	0.00958776549469854
ENSG00000175536	LIPT2	1.13091128953804	0.00155647091808114	0.0096163893823901
ENSG00000172349	IL16	1.93476728011584	0.00155644860174311	0.0096163893823901
ENSG00000255571	MIR9-3HG	1.22741335814934	0.00157459047474194	0.00972072382045879
ENSG00000006453	BAIAP2L1	1.01689558867406	0.00158246488662686	0.00975915210118617
ENSG00000109084	TMEM97	1.17481437616139	0.00158335058077335	0.00976207003461171
ENSG00000136770	DNAJC1	1.06117352043226	0.00159034849353135	0.00980266121449139
ENSG00000172171	TEFM	0.899886129545567	0.00159579498860062	0.00982599448744636
ENSG00000121903	ZSCAN20	0.829187206749976	0.00159795487413399	0.00983673417966508
ENSG00000123091	RNF11	0.798044753335945	0.00160013464185085	0.00984759064502383
ENSG00000168291	PDHB	0.779523710806634	0.00162090007836662	0.00995386007024917
ENSG00000128266	GNAZ	1.32988288414942	0.00162118821412079	0.00995386007024917
ENSG00000099942	CRKL	0.788939694559905	0.00162778716203275	0.00998660295960098
ENSG00000182307	C8orf33	0.772071744609321	0.00164259004012073	0.0100591635919712
ENSG00000114573	ATP6V1A	0.828643292793512	0.00164894773072077	0.0100928738106688
ENSG00000181610	MRPS23	0.982082533740821	0.00165020735041639	0.0100979716919842
ENSG00000151292	CSNK1G3	0.936228501340432	0.00165085870036871	0.0100993457670178
ENSG00000197846		1.5091704204969	0.00167344390456083	0.0102163836722453
ENSG00000100075	SLC25A1	1.08957629649137	0.00168521265499872	0.0102829260070229
ENSG00000164091	WDR82	0.675580584943072	0.00168685226678696	0.0102902771820005
ENSG00000187954	CYHR1	0.540864516427974	0.00169374015994074	0.0103269707303988
ENSG00000131873	CHSY1	0.838803482089729	0.00169564109774136	0.010335897809339
ENSG00000148019	CEP78	1.00694204267734	0.00169842583159335	0.010350206142929
ENSG00000087077	TRIP6	0.989331001627183	0.00170005669668075	0.0103574772434492
ENSG00000184992	BRI3BP	0.999456547151004	0.00170692910778177	0.0103951681802384
ENSG00000179958	DCTPP1	1.046541988015	0.00171471395252798	0.0104228482362436
ENSG00000234636	MED14OS	1.47689197161675	0.00171475080013931	0.0104228482362436
ENSG00000117318	ID3	2.73314860475478	0.00171635041402463	0.0104272143381424
ENSG00000115806	GORASP2	0.602416704338641	0.00171775436979222	0.0104325050090484
ENSG00000136504	KAT7	0.6448443264996	0.00171810303090316	0.0104325050090484
ENSG00000184220	CMSS1	0.961135929882303	0.00171947454483291	0.0104381544777787
ENSG00000134697	GNL2	0.714675977294598	0.00172560435571732	0.0104726791149882
ENSG00000243147	MRPL33	1.46802032596325	0.00174133200423262	0.0105545950861057
ENSG00000178252	WDR6	0.528702236798895	0.0017553585828312	0.0106232864822339
ENSG00000213246	SUPT4H1	0.741139701878408	0.00176278481668029	0.010661385258648
ENSG00000139343	SNRPF	1.51284302275199	0.00176300555792122	0.010661385258648
ENSG00000185359	HGS	0.536339127542541	0.00177165312534151	0.0107082811791345
ENSG00000101152	DNAJC5	0.829603326125143	0.00177451032434206	0.0107227369266869
ENSG00000103257	SLC7A5	1.95722718970205	0.0017778318032271	0.0107373236242376
ENSG00000133104	SPG20	2.03799681326241	0.00178581036628701	0.0107827585346898
ENSG00000179933	C14orf119	0.505973551542732	0.00179016600315282	0.0108063005440319
ENSG00000264364	DYNLL2	0.855322147732839	0.00179683522323884	0.0108410280182306
ENSG00000168672	FAM84B	0.950345569854301	0.00183088529084353	0.0110295923210872
ENSG00000134590	FAM127A	0.868358417667287	0.00183374916004849	0.0110440331825471
ENSG00000011105	TSPAN9	0.78586524859975	0.00183592959859897	0.0110487289144576
ENSG00000205269	TMEM170B	1.54309474630434	0.0018377093854692	0.0110566278129564
ENSG00000010270	STARD3NL	0.835676749858392	0.00184705693913912	0.0110987578341414
ENSG00000135951	TSGA10	1.21561897785697	0.00184684399815662	0.0110987578341414
ENSG00000116198	CEP104	0.534260512015569	0.00184794177438331	0.0111012557012522
ENSG00000054793	ATP9A	0.724968236263451	0.00186040481630053	0.0111704539883581
ENSG00000115163	CENPA	1.74062511803273	0.00186465581240605	0.0111931381250544
ENSG00000173334	TRIB1	1.65398830579201	0.00186924782147222	0.0112150129816169
ENSG00000185344	ATP6V0A2	1.01868292017461	0.00187088470624117	0.0112219885434182
ENSG00000068305	MEF2A	0.635441968228838	0.00187837445819744	0.011258352280731
ENSG00000185112	FAM43A	1.52797751800729	0.00188943306265446	0.0113188998890107
ENSG00000109062	SLC9A3R1	1.07620287010901	0.00188994030828476	0.0113190730232706
ENSG00000111261	MANSC1	0.895373225928856	0.00189146051804699	0.0113253112951786
ENSG00000108270		0.849174134909124	0.00189425408997924	0.0113363010953917
ENSG00000157593	SLC35B2	0.72911792921854	0.00190898760347636	0.0114158134094165
ENSG00000241685	ARPC1A	0.622301198863798	0.00193121405733442	0.0115341540228936
ENSG00000090447	TFAP4	1.05598341143553	0.00195986077785849	0.0116728380534773
ENSG00000213625	LEPROT	0.538906303547237	0.00196788278325421	0.011711773214322
ENSG00000112139	MDGA1	1.8094214856299	0.00197417114345674	0.0117403397254629
ENSG00000087111	PIGS	0.857691806130432	0.00198509342433228	0.0117964002260107
ENSG00000178966	RMI1	0.88703405353598	0.00200176981625594	0.0118778388315565
ENSG00000115750	TAF1B	0.895651924202485	0.00200180962938966	0.0118778388315565
ENSG00000144597	EAF1	0.625973581041485	0.00200531676905767	0.0118926843875217
ENSG00000081154	PCNP	0.942694428536174	0.00201306931427544	0.0119326801562374
ENSG00000186815	TPCN1	0.990301026037406	0.00201620752950487	0.0119482891987663
ENSG00000147099	HDAC8	0.73332598528061	0.00202801792283227	0.0120092562832783
ENSG00000066827	ZFAT	0.554129929478439	0.00203796797633736	0.0120561090560177
ENSG00000140396	NCOA2	0.60398326324263	0.00203848123568315	0.0120561313371583
ENSG00000053372	MRTO4	0.71588912632772	0.00204358487413998	0.012080277011435
ENSG00000171298	GAA	1.1930609218832	0.00204505603493495	0.0120859542843821
ENSG00000150967	ABCB9	1.03624115831551	0.00206299497947914	0.0121828425753469
ENSG00000144840	RABL3	1.25349309457074	0.00206374679674949	0.0121842416296116
ENSG00000143106	PSMA5	0.765342269418182	0.00207258321327761	0.0122272591811987
ENSG00000165312	OTUD1	1.32666712239439	0.00207611045145424	0.0122450153571191
ENSG00000166598	HSP90B1	1.15524795512262	0.00207786908561322	0.0122492815577642
ENSG00000112592	TBP	0.552736995393323	0.00208024362558987	0.0122571725379316
ENSG00000111907	TPD52L1	1.32330042603101	0.00209047144813047	0.0123143703950986
ENSG00000130222	GADD45G	2.291188258277	0.00209160831744857	0.0123180008998969
ENSG00000143013	LMO4	1.3353321766296	0.00210296208986101	0.0123756259468742
ENSG00000078319	PMS2P1	1.01747252044568	0.00210409679303857	0.0123792248666513
ENSG00000177733	HNRNPA0	1.10077189005059	0.00210689191265471	0.012392588448707
ENSG00000078369	GNB1	0.590465400153875	0.00215324810978931	0.0126119579262239
ENSG00000136603	SKIL	1.005641003246	0.00216223119300465	0.0126583069569691
ENSG00000141141		0.771650309302025	0.00216586589619863	0.0126764493449785
ENSG00000134690	CDCA8	1.14568159035329	0.00217277129644144	0.0127105777967105
ENSG00000101639	CEP192	0.806738968969557	0.00218029068877103	0.0127490585631182
ENSG00000106052	TAX1BP1	0.817441542745381	0.0021804268269002	0.0127490585631182
ENSG00000140199	SLC12A6	1.93378842881019	0.00218170012619583	0.0127502025404228
ENSG00000198324	FAM109A	0.781706148097978	0.00219478997754071	0.0128172051427803
ENSG00000026508	CD44	1.71106794402715	0.00219616862984433	0.0128220918549239
ENSG00000112902	SEMA5A	2.46849435725095	0.00219889063381087	0.0128348172343035
ENSG00000163795	ZNF513	0.865086628125507	0.00220087913001814	0.0128369245387279
ENSG00000076944	STXBP2	0.627385922425759	0.00220672217452187	0.0128627610945365
ENSG00000122512	PMS2	0.640566579338737	0.00220662362678609	0.0128627610945365
ENSG00000108774	RAB5C	1.28610689499002	0.00221150775176227	0.0128809871924432
ENSG00000157916	RER1	0.371784742660207	0.00221733856705782	0.0129042996832979
ENSG00000104447	TRPS1	1.00136214101893	0.00221806997999297	0.012905382330114
ENSG00000023892	DEF6	1.08803897612467	0.00222292980754771	0.0129304788682403
ENSG00000157954	WIPI2	0.550513847762489	0.00222383334528127	0.0129325555294644
ENSG00000177728	TMEM94	0.733935144914051	0.00223948608253529	0.0130012166759158
ENSG00000136522	MRPL47	0.829954697044936	0.00224007367432206	0.0130014381543986
ENSG00000139644	TMBIM6	0.553281026059496	0.00224839514376005	0.0130335740075013
ENSG00000116857	TMEM9	0.931113987026803	0.00224941545752124	0.0130335740075013
ENSG00000119777	TMEM214	0.695242462509289	0.002261816390375	0.0130795115458073
ENSG00000166268	MYRFL	2.0952366455285	0.00226853588584044	0.0131151636126661
ENSG00000264198		2.99161666633206	0.00229340045884577	0.0132427367149018
ENSG00000058272	PPP1R12A	1.16121123948751	0.0022956287880072	0.0132523698488935
ENSG00000241553	ARPC4	0.808433112225838	0.00229851678729309	0.0132658055457845
ENSG00000115457	IGFBP2	1.55071772749939	0.00230731192222048	0.0133100736264025
ENSG00000272269	RP11-500C11.3	1.08774075038021	0.00231391263452644	0.0133417038944115
ENSG00000150687	PRSS23	2.26480801765616	0.00231392269715018	0.0133417038944115
ENSG00000176293	ZNF135	0.897335819069792	0.00231923765132024	0.013369091484334
ENSG00000167977	KCTD5	0.813986708257439	0.00231987324636957	0.01336949844833
ENSG00000123607	TTC21B	1.0388410389566	0.00232820255662787	0.0134077043313422
ENSG00000177788	RP5-1061H20.4	1.29032143879925	0.00234320664539381	0.0134842652845218
ENSG00000185201	IFITM2	1.76243502448516	0.0023467189764656	0.0134979122849066
ENSG00000162290		0.722972528261493	0.00235855152500235	0.0135560856779525
ENSG00000005882	PDK2	0.940408447690238	0.00236760504269644	0.0135949134009527
ENSG00000157259	GATAD1	0.686984696630228	0.00238210261575347	0.0136615836637359
ENSG00000114956	DGUOK	0.70143600170891	0.0023844028345281	0.013671462145248
ENSG00000001630	CYP51A1	0.996750318723099	0.00238587131010578	0.0136715258193966
ENSG00000225526	MKRN2OS	1.47088019434421	0.00238614721861589	0.0136715258193966
ENSG00000115020	PIKFYVE	0.530637762808531	0.00238905882249824	0.0136782721792344
ENSG00000080824	HSP90AA1	1.05801167710117	0.00239128166605592	0.0136843767990039
ENSG00000160211	G6PD	1.15860078426294	0.00239200761861037	0.0136852215375187
ENSG00000060491	OGFR	0.955067001473225	0.00239365696606994	0.013691347543658
ENSG00000108468	CBX1	0.913486805867381	0.00239464202320771	0.0136936718693001
ENSG00000167264	DUS2	0.961890223353242	0.00239708232535827	0.0137010046050611
ENSG00000116273	PHF13	0.622671496899221	0.00240626462720932	0.0137402123247235
ENSG00000142669	SH3BGRL3	1.03616504875714	0.00241985365052142	0.0138044833491534
ENSG00000184117	NIPSNAP1	0.68921186271787	0.00242365439592928	0.0138163973604869
ENSG00000101811	CSTF2	0.64587333052379	0.00243920253924274	0.0138936970242357
ENSG00000183978	COA3	0.706003669756135	0.00244012982742231	0.0138936970242357
ENSG00000151846	PABPC3	1.89406735470268	0.00245643907799332	0.0139794896350543
ENSG00000174306	ZHX3	0.720686265558546	0.0024838123773457	0.0141172086526136
ENSG00000067601	PMS2P4	1.07565173697932	0.00248421826604755	0.0141172086526136
ENSG00000149089	APIP	0.819133737701914	0.00250257401447732	0.0141976525784169
ENSG00000105221	AKT2	0.45164810120827	0.00250864063612278	0.0142267562654894
ENSG00000126746	ZNF384	0.527380446542551	0.00250890647406868	0.0142267562654894
ENSG00000260855	RP11-439E19.10	1.52067817211736	0.00251658928012774	0.0142634855414761
ENSG00000113648	H2AFY	0.682322969093708	0.00252583586493432	0.0143021904934053
ENSG00000198276	UCKL1	0.46408082072898	0.00253080417509625	0.0143268945443308
ENSG00000101290	CDS2	0.582510470117253	0.00253472063925194	0.0143422033683928
ENSG00000162385	MAGOH	1.19926569551879	0.00253916978687993	0.0143639432624767
ENSG00000005889	ZFX	0.982500463216016	0.00256053749921975	0.014477896975875
ENSG00000164920	OSR2	1.48207270381655	0.00256193278338873	0.0144823257174696
ENSG00000198780	FAM169A	1.93858897578289	0.00256858801486758	0.014509548387637
ENSG00000090971	NAT14	0.982947884578931	0.00258464648146943	0.0145828540035792
ENSG00000223496	EXOSC6	0.78904064865473	0.00258556082642154	0.0145845353600984
ENSG00000179965	ZNF771	0.799943527714491	0.00258762197730265	0.0145921333518732
ENSG00000161203	AP2M1	0.490825201151298	0.00260231466906314	0.0146615647652479
ENSG00000060971	ACAA1	0.599011135001089	0.00261174100149165	0.0146960688339166
ENSG00000101104	PABPC1L	1.20645134395948	0.00261598202413049	0.0147140438880437
ENSG00000154889	MPPE1	0.792672148212548	0.00261789429902842	0.0147213005698454
ENSG00000106367	AP1S1	0.852733594507411	0.00263506718478406	0.0148037974343649
ENSG00000167258	CDK12	0.387022734329463	0.00264075882597279	0.014832251625681
ENSG00000054965	FAM168A	0.478874417356004	0.00265366348388706	0.0148941269020919
ENSG00000230055		1.00194366335586	0.00265479490549404	0.0148969437630319
ENSG00000085415	SEH1L	0.900457523910525	0.0026571999110752	0.0149069041004676
ENSG00000248971	KRT8P46	1.05706984232036	0.0026666450067438	0.014952801136156
ENSG00000123064	DDX54	0.798396777739873	0.00269025082628505	0.0150744506991199
ENSG00000118640	VAMP8	0.753214243423324	0.00269434712672044	0.015093829559561
ENSG00000128463	EMC4	0.522620621893327	0.00270362630972634	0.015136665724997
ENSG00000118600	TMEM5	0.523789318982689	0.00270391269152526	0.015136665724997
ENSG00000069424	KCNAB2	1.86560070319313	0.00271587073711634	0.0151928248823603
ENSG00000240682	ISY1	0.606046089138507	0.0027229860060687	0.0152205587486421
ENSG00000179178	TMEM125	0.929435475065368	0.00273339254781099	0.0152691850469432
ENSG00000072518	MARK2	0.477564230162424	0.00273835576579904	0.0152933000911265
ENSG00000137804	NUSAP1	1.22571264557605	0.00275444186155903	0.0153795086762792
ENSG00000120885	CLU	1.86331164628128	0.00275971565646198	0.015398055076364
ENSG00000001461	NIPAL3	1.05694456284609	0.00277922023658898	0.0154740443431541
ENSG00000144815	NXPE3	1.05097140280795	0.00279534199742936	0.0155528280473009
ENSG00000087266	SH3BP2	0.876623177865525	0.00279919166585637	0.0155669265309423
ENSG00000089048	ESF1	1.0357333743975	0.00280480564821439	0.0155871573634798
ENSG00000184575	XPOT	0.820604364947733	0.00281326282779825	0.0156228969299855
ENSG00000198406	BZW1P2	1.79905143829176	0.00281387764508297	0.0156228969299855
ENSG00000230513	THAP7-AS1	1.51734303621599	0.00281581630500679	0.0156299932501468
ENSG00000100461	RBM23	0.369598614518069	0.00281749596514004	0.0156319828893573
ENSG00000158985	CDC42SE2	0.87567446025683	0.00281697045952608	0.0156319828893573
ENSG00000055130	CUL1	0.601119811066024	0.00283649759515639	0.0157167083670279
ENSG00000166188	ZNF319	1.01330131959612	0.00283524988376694	0.0157167083670279
ENSG00000158406	HIST1H4H	1.27320155697156	0.00283585697377717	0.0157167083670279
ENSG00000145833	DDX46	0.738607307719951	0.00283875983547735	0.0157204713285515
ENSG00000196312	MFSD14C	0.875630956941169	0.0028470900829683	0.0157481749960913
ENSG00000171700	RGS19	1.01571378614512	0.00284705660391214	0.0157481749960913
ENSG00000231113	RP3-475N16.1	1.11089334364728	0.00284675018308698	0.0157481749960913
ENSG00000162434	JAK1	0.754156849407002	0.00284946852580598	0.0157502858505366
ENSG00000163349	HIPK1	0.343818857659394	0.00285506311789593	0.0157738404293186
ENSG00000145050	MANF	1.00937989448553	0.00285852155957297	0.015789261359518
ENSG00000125814	NAPB	0.931154418312527	0.00286161633213447	0.0158026668068373
ENSG00000115234	SNX17	0.661805469609883	0.00287240200671545	0.0158474349929839
ENSG00000240429	LRRFIP1P1	1.29461075228908	0.00287359296396473	0.015850310094708
ENSG00000158158	CNNM4	0.633770989746769	0.00289628935380596	0.0159643361237155
ENSG00000232973	CYP1B1-AS1	2.4881517937297	0.00289839057686949	0.0159721975362047
ENSG00000076351	SLC46A1	0.921550584160174	0.0029001318421512	0.0159780721259194
ENSG00000138442	WDR12	0.648739073699213	0.00290931676105386	0.016013761925289
ENSG00000164683	HEY1	2.63026217970737	0.00291154278708278	0.0160222876676139
ENSG00000198618	PPIAP22	0.957421518116412	0.00291553870548647	0.0160405469397643
ENSG00000100038	TOP3B	0.63851430604937	0.00291898837434754	0.0160557930967424
ENSG00000134375	TIMM17A	0.87845440069274	0.00292363936081717	0.0160776377708668
ENSG00000184669	OR7E14P	1.80885796599168	0.00292431868173142	0.0160776377708668
ENSG00000198157	HMGN5	2.17162840798822	0.00293488439770542	0.0161244879273052
ENSG00000131127	ZNF141	1.18322613969645	0.00295202617180736	0.0162036175605376
ENSG00000130396	AFDN	0.668957844389339	0.00295572621871456	0.0162103760629295
ENSG00000155363	MOV10	0.600132329267421	0.00295936752292086	0.016221337432216
ENSG00000254470	AP5B1	1.10262525844422	0.00296133457198577	0.016228360346665
ENSG00000124593	PRICKLE4	0.826210366039291	0.00296625593583112	0.0162482704436666
ENSG00000150540	HNMT	0.997397585708856	0.0029663410521337	0.0162482704436666
ENSG00000170906	NDUFA3	1.11226419248278	0.00297642473001495	0.0162997311701791
ENSG00000167323	STIM1	0.821277548226946	0.00298023062204156	0.0163167971331257
ENSG00000101544	ADNP2	0.647431145685054	0.00298733564268798	0.0163405740436721
ENSG00000125812	GZF1	1.25257431879034	0.00299765285662591	0.0163894315033131
ENSG00000148411	NACC2	0.931049588207694	0.0029994835529238	0.0163918658921099
ENSG00000134864	GGACT	1.13244839634589	0.00300922231893097	0.0164374948598485
ENSG00000169062	UPF3A	0.778517023059116	0.00301642754516024	0.0164654498272495
ENSG00000101574	METTL4	1.02927550577792	0.00302750092945429	0.0165144662272192
ENSG00000130517	PGPEP1	0.827744900419506	0.00305748478936669	0.0166588216833488
ENSG00000147649	MTDH	0.43493290536849	0.00307316855839507	0.0167327168884727
ENSG00000091317	CMTM6	0.770449872759519	0.00308082777628432	0.0167705607706961
ENSG00000166228	PCBD1	0.751910631208981	0.00308199057951168	0.016773031987807
ENSG00000103343	ZNF174	0.668895716607315	0.00308440953322227	0.0167784788010664
ENSG00000253953	PCDHGB4	1.62620681038227	0.00312505177151234	0.0169450275135877
ENSG00000181026	AEN	1.80430994057328	0.00313036538493253	0.0169621790940367
ENSG00000145911	N4BP3	1.18714714331768	0.00314189313084067	0.0170164356763309
ENSG00000130701	RBBP8NL	1.37858993888574	0.0031626724844963	0.0171059014858596
ENSG00000124172	ATP5E	1.27474678714396	0.00317002278913414	0.0171361519243818
ENSG00000122378	FAM213A	0.767102319082052	0.0031767825690109	0.0171626040937226
ENSG00000204842	ATXN2	0.569877732130243	0.00317891191766876	0.0171701877899557
ENSG00000166913	YWHAB	0.912942043644704	0.00321286243779333	0.0173140432396956
ENSG00000089123	TASP1	0.695131811798113	0.00321780070409347	0.0173367072087804
ENSG00000127129	EDN2	3.37375507444974	0.00322217500424139	0.0173516700597557
ENSG00000154719	MRPL39	0.80647597067848	0.0032286154952378	0.017379146602323
ENSG00000118518	RNF146	0.650805282239379	0.00323107561888843	0.0173884335614639
ENSG00000106701	FSD1L	1.25207513712432	0.00323319887953531	0.0173959038395734
ENSG00000161509	GRIN2C	1.30086404153121	0.00325099189177756	0.017483686621621
ENSG00000171421	MRPL36	0.949461178102074	0.00327084019201907	0.0175824378609149
ENSG00000167543	TP53I13	0.934759646165156	0.00327166798177042	0.0175828933574003
ENSG00000196684	HSH2D	1.6441171555169	0.00327845200782977	0.0176153519212706
ENSG00000124508	BTN2A2	1.37783850328743	0.00328140599339636	0.017620220944995
ENSG00000089157	RPLP0	0.958272623162421	0.00328530544670797	0.0176281593617802
ENSG00000168274		1.37564222900742	0.00328458076594001	0.0176281593617802
ENSG00000180628	PCGF5	1.42345057287094	0.00328429208251578	0.0176281593617802
ENSG00000152102	FAM168B	0.476261911986476	0.00330024419016418	0.0176922696583269
ENSG00000234420	ZNF37BP	1.01501996378395	0.00330644107124946	0.0177214756668122
ENSG00000188766	SPRED3	1.25005498592322	0.00332760211783806	0.0178066596369068
ENSG00000145916	RMND5B	0.775068333402068	0.00334590240154959	0.0178964937902052
ENSG00000165775	FUNDC2	0.608660856505664	0.00334889569229815	0.0179084562184974
ENSG00000047188	YTHDC2	0.758433332315886	0.00335636173070533	0.0179401142769625
ENSG00000152082	MZT2B	0.996579816648712	0.00335709022602333	0.0179401142769625
ENSG00000163629	PTPN13	0.974235980848125	0.00335955175170239	0.0179492149696396
ENSG00000145220	LYAR	1.03919770580038	0.00336123340241521	0.0179541458242328
ENSG00000147140	NONO	0.378575766094508	0.00336722409376965	0.0179780288201424
ENSG00000124198	ARFGEF2	0.621572649300326	0.00336688260068297	0.0179780288201424
ENSG00000102882	MAPK3	0.745585184603231	0.00338744100799145	0.0180689027540881
ENSG00000138463	DIRC2	0.614230199481763	0.00339147530343355	0.0180830284148599
ENSG00000215039	CD27-AS1	0.92131598761688	0.00341006352521569	0.0181494226714303
ENSG00000139146	FAM60A	1.12891213436938	0.00342075780593181	0.0181940642755146
ENSG00000135213		0.550313649719586	0.00342454315803575	0.0181942464788102
ENSG00000105698	USF2	0.718412046641848	0.00342437388635767	0.0181942464788102
ENSG00000116106	EPHA4	2.04906952698634	0.00342463651340154	0.0181942464788102
ENSG00000162949	CAPN13	1.14833888219948	0.00343838651385076	0.0182550011391632
ENSG00000088002	SULT2B1	0.883443434648886	0.00344897314631698	0.0182871349921769
ENSG00000002919	SNX11	0.754077853924751	0.00349029843458804	0.0184601993423462
ENSG00000140479	PCSK6	1.80528916931053	0.00349027664199796	0.0184601993423462
ENSG00000114805	PLCH1	2.83215506962523	0.00349455496581565	0.0184785819343231
ENSG00000176182	MYPOP	0.706629942936086	0.0035101676491438	0.0185445628670886
ENSG00000125457	MIF4GD	0.938696177398027	0.00351344494598492	0.018556166312419
ENSG00000260924	LINC01311	1.19014747035564	0.0035153900471762	0.0185597221522379
ENSG00000175063	UBE2C	1.3690676032294	0.00353668106360326	0.0186574923022497
ENSG00000168421	RHOH	1.92831077147001	0.00353793040868956	0.0186579111345712
ENSG00000204564	C6orf136	1.20341126792489	0.00354323340692593	0.0186817139278271
ENSG00000184634	MED12	0.531631176520042	0.00355106868903004	0.0187105184565838
ENSG00000163935	SFMBT1	0.629924624559356	0.00355322582110318	0.0187124455327055
ENSG00000169105	CHST14	1.05855244527526	0.00356011384614492	0.0187331496422787
ENSG00000184162	NR2C2AP	0.74087557690502	0.00357214672470941	0.0187881102348964
ENSG00000122696	SLC25A51	0.683976872508673	0.0035825429696084	0.0188386031755208
ENSG00000184436	THAP7	0.791279402954178	0.00359270450973445	0.0188710692150602
ENSG00000204248	COL11A2	1.90631804547565	0.0035909292966363	0.0188710692150602
ENSG00000157216	SSBP3	0.920222698551982	0.00360017443622048	0.0188977213141715
ENSG00000127399	LRRC61	1.18718683735155	0.00360514064538981	0.0189104030311558
ENSG00000171791	BCL2	1.9303548851571	0.00360628608019318	0.0189104030311558
ENSG00000135052	GOLM1	1.27068417053581	0.0036155235581624	0.0189446709381747
ENSG00000235162	C12orf75	1.58380352869493	0.0036274307939649	0.0189902422295556
ENSG00000151062	CACNA2D4	1.32627707536813	0.00364237376987035	0.0190558236826093
ENSG00000125999	BPIFB1	3.84573951936239	0.00365515853032279	0.0191100345344737
ENSG00000177283	FZD8	1.67016722626844	0.00366584227251031	0.0191447419321146
ENSG00000130758	MAP3K10	0.688453519942225	0.00366853723325821	0.0191545888240488
ENSG00000115233	PSMD14	0.857648719974229	0.00367118822178317	0.0191642018292643
ENSG00000197989	SNHG12	1.0293203317596	0.00371790968303299	0.019355377320199
ENSG00000268364	SMC5-AS1	1.10948454750299	0.00371844420815724	0.019355377320199
ENSG00000109103	UNC119	0.856372414682873	0.00373072336234313	0.0194022213017858
ENSG00000072133	RPS6KA6	2.06195715923979	0.00374191406561765	0.0194518700647431
ENSG00000187990		1.22390013289411	0.0037526838141555	0.0194950070459631
ENSG00000197308	GATA3-AS1	1.04657928374287	0.00377088370881041	0.0195766610797676
ENSG00000117054	ACADM	0.748531411048558	0.00377760730959162	0.0196072651385976
ENSG00000004487	KDM1A	0.411763752144635	0.00377962722719081	0.0196108958216574
ENSG00000004142	POLDIP2	0.641229367740925	0.00378773812933154	0.0196469196305068
ENSG00000124216	SNAI1	2.21678191418795	0.003789418863033	0.019651329948707
ENSG00000254231	CTD-2284J15.1	1.53209209568047	0.00379025921964399	0.0196513812257747
ENSG00000165704	HPRT1	1.17663484026111	0.00379664423168072	0.0196758634372012
ENSG00000049239	H6PD	0.884340269244709	0.00380095457863235	0.0196899109473945
ENSG00000111110	PPM1H	3.42762779946186	0.00380101902580814	0.0196899109473945
ENSG00000152767	FARP1	0.745079479824668	0.00380629324334028	0.0197086032860308
ENSG00000115756	HPCAL1	0.799911885442573	0.00381384014355157	0.0197433601655788
ENSG00000139437	TCHP	0.898009030524347	0.00381557174956688	0.0197480040048121
ENSG00000250539	KRT8P33	1.16502981881464	0.00383476705534944	0.0198343372307615
ENSG00000146828	SLC12A9	0.909350545514536	0.00383913193252474	0.0198525740645396
ENSG00000184014	DENND5A	0.613582335582652	0.0038549532767364	0.0199178062788245
ENSG00000122873	CISD1	1.58023663469468	0.00385728714318417	0.019920337335043
ENSG00000174738	NR1D2	0.665417036588998	0.00385922005321744	0.0199216239352715
ENSG00000092201	SUPT16H	0.476933638616302	0.00386116922506813	0.0199273385763985
ENSG00000111843	TMEM14C	0.527712615666067	0.00386239117710688	0.0199292983916005
ENSG00000138433	CIR1	0.662292174609189	0.0038637850480393	0.0199321442319063
ENSG00000081870	HSPB11	1.02245281251318	0.00386858741009356	0.019943874484759
ENSG00000263470		1.49289003135672	0.00387030748644445	0.0199440518405346
ENSG00000158528	PPP1R9A	0.995382402476613	0.00387688851920669	0.0199649212252422
ENSG00000103150	MLYCD	0.781647063640203	0.00390109021804772	0.0200851822954011
ENSG00000117519	CNN3	1.49709704309968	0.00391188587663929	0.0201276267664526
ENSG00000103196	CRISPLD2	1.93468460250595	0.00393513054850303	0.0202340274161728
ENSG00000166562	SEC11C	1.13827534509902	0.00394062977256368	0.0202579018701226
ENSG00000111229	ARPC3	0.955336348565356	0.003995660040652	0.0204962721747124
ENSG00000174173	TRMT10C	0.850204588951629	0.00399923853195908	0.0205101823540849
ENSG00000186814	ZSCAN30	0.741077793144062	0.00400072525000762	0.0205133611247953
ENSG00000122965	RBM19	0.55093968921293	0.00401191951296016	0.0205573952869589
ENSG00000172939	OXSR1	0.731836852810808	0.00401470839958188	0.0205627802725771
ENSG00000118960	HS1BP3	0.803588840129855	0.00401648641632689	0.0205674352022383
ENSG00000224870	RP4-758J18.2	0.5883666435797	0.00402446699594084	0.0205997930299176
ENSG00000110693	SOX6	1.60078386356196	0.00403024072652715	0.0206244780086099
ENSG00000175701	LINC00116	1.35687763289905	0.00404504770171921	0.0206778923667707
ENSG00000149657	LSM14B	0.396519885882829	0.00406364554531779	0.0207460721766677
ENSG00000129625	REEP5	0.77436060289783	0.00407849493706967	0.0208127094060293
ENSG00000183309	ZNF623	0.599928625873768	0.00410689347555569	0.0209172234851645
ENSG00000198648	STK39	0.82002179968569	0.00412848299308716	0.021008254937806
ENSG00000163798	SLC4A1AP	0.547563635388877	0.00414774395088597	0.0210792710024896
ENSG00000111665	CDCA3	1.32586381323882	0.00414714234959254	0.0210792710024896
ENSG00000147601	TERF1	0.579238484203642	0.00415727296650933	0.0211102039069765
ENSG00000105258	POLR2I	1.03810598154812	0.00415671563965293	0.0211102039069765
ENSG00000225808	DNAJC19P5	1.79430102086744	0.00415899370921293	0.0211144106717669
ENSG00000113141	IK	0.743861712571823	0.00417027936452003	0.0211671644364302
ENSG00000243554	AC004967.7	1.06482991025183	0.00419011683899696	0.0212465126523487
ENSG00000116035	VAX2	1.25558108780001	0.00418895668483497	0.0212465126523487
ENSG00000117862	TXNDC12	0.772346124133813	0.0041968443834606	0.0212518571893491
ENSG00000049449	RCN1	0.983081083137067	0.00421667351671486	0.0213431327114489
ENSG00000166689	PLEKHA7	0.682586793524715	0.00423758766341228	0.0214306554561498
ENSG00000160948	VPS28	0.694750395176002	0.00423926507353711	0.0214345575716044
ENSG00000112984	KIF20A	1.36137593390971	0.00426335043152874	0.0215195523168226
ENSG00000259758		0.73347487008297	0.00427364655645383	0.0215623237666028
ENSG00000169247	SH3TC2	2.45081997049099	0.00430359114615633	0.021685663818462
ENSG00000184292	TACSTD2	0.997455823497129	0.00431988446008091	0.0217492395699776
ENSG00000197191	CYSRT1	1.15006832032788	0.00435279864702597	0.0218777133357212
ENSG00000183935	HTR7P1	2.09573018048577	0.00437098874329347	0.0219504895230377
[truncated: 393 more rows]
